# Supplementary material for: Modeling of Anticancer Sulfonamide Derivatives Lipophilicity by Chemometric and Quantitative Structure-Retention Relationships Approaches
Source: MDPI journal article supplement (doi:10.3390/molecules27133965), 2022-06-21
Supplement: s1 [file s1]

## Supplementary materials

### Modeling of anticancer sulfonamide derivatives lipophilicity by chemometric and quantitative structure-retention relationships approaches

Monika Pastewska<sup>1</sup>, Beata Żołnowska<sup>2</sup>, Strahinja Kovačević<sup>3</sup>, Hanna Kapica<sup>1</sup>, Maciej Gromelski<sup>4</sup>, Filip Stoliński<sup>4,5</sup>,  
Jarosław Sławiński<sup>2</sup>, Wiesław Sawicki<sup>1</sup>, Krzesimir Ciura<sup>1,4\*</sup>

<sup>1</sup> Department of Physical Chemistry, Medical University of Gdańsk, Al. Gen. Hallera 107, 80-416 Gdańsk, Poland

<sup>2</sup> Department of Organic Chemistry, Medical University of Gdańsk, Al. Gen. Hallera 107, 80-416 Gdańsk, Poland

<sup>3</sup> University of Novi Sad, Faculty of Technology Novi Sad, Department of Applied and Engineering Chemistry, Bulevar cara Lazara 1, 21000 Novi Sad, Serbia

<sup>4</sup> QSAR Lab Ltd., Trzy Lipy 3 St. Gdańsk, 80-172, Poland

<sup>5</sup> University of Gdansk, Faculty of Chemistry, Laboratory of Environmental Chemoinformatics, Wita Stwosza 63, 80-308 Gdansk, Poland

\* Correspondence: k.ciura@qsarlab.pl

**Table S1.** The SMILES of the studied sulfonamide derivatives together with their chemical class of substituents and maximum of absorbance.

| No | Substituent's chemical class     | Smiles                                                                                                           | max abs. |
|----|----------------------------------|------------------------------------------------------------------------------------------------------------------|----------|
| 1  | pyrrole                          | <chem>O=S(NC1=NC=CC(C)=N1)(C2=CC=C(N3C=CC=C3)C=C2)=O</chem>                                                      | 244      |
| 2  | pyrrole                          | <chem>O=S(C1=CC=C(N2C=CC=C2)C=C1)(NC3=C4C(C=CC=N4)=CC=C3C)=O</chem>                                              | 237      |
| 3  | pyrrole                          | <chem>O=S(C1=CC=C(N2C=CC=C2)C=C1)(NC3=C4C(C=CC=N4)=CC=C3C)=O</chem>                                              | 280      |
| 4  | pyrrole                          | <chem>O=S(C1=CC=C(N2C=CC=C2)C=C1)(NC3=C4C(C=CC(C)=N4)=CC=C3C)=O</chem>                                           | 239      |
| 5  | pyrrole                          | <chem>O=S(NC1=CC=CC2=NSN=C21)(C3=CC=C(N4C=CC=C4)C=C3)=O</chem>                                                   | 248      |
| 6  | pyrrole                          | <chem>ClC1=CC=C(NS(C2=CC=C(N3C=CC=C3)C=C2)(=O)=O)C=C1</chem>                                                     | 278      |
| 7  | pyrrole                          | <chem>O=S(NC1=NC(C)=CC(C)=N1)(C2=CC=C(N3C=CC=C3)C=C2)=O</chem>                                                   | 244      |
| 8  | 5-oxo-4.5-dihydro-1.2.4-triazine | <chem>ClC1=C(C)C=C(S(NC2=NN=C(C3=CC=CC=C3)C(N2)=O)(=O)=O)C(SCC4=CC=C(C(F)(F)F)C=C4)=C1</chem>                    | 224      |
| 9  | 5-oxo-4.5-dihydro-1.2.4-triazine | <chem>ClC1=C(C)C=C(S(NC2=NN=C(C)C(N2)=O)(=O)=O)C(SCC3=CC=CC4=C3C=CC=C4)=C1</chem>                                | 221      |
| 10 | 5-oxo-4.5-dihydro-1.2.4-triazine | <chem>ClC1=C(C)C=C(S(NC2=NN=C(C3=CC=CC=C3)C(N2)=O)(=O)=O)C(SCC4=CC=CC5=C4C=CC=C5)=C1</chem>                      | 222      |
| 11 | 5-oxo-4.5-dihydro-1.2.4-triazine | <chem>ClC1=C(C)C=C(S(NC2=NN=C(C3=CC=CC=C3)C(N2)=O)(=O)=O)C(SCC4=C(Cl)C=C(OCO5)C5=C4)=C1</chem>                   | 194      |
| 12 | 5-oxo-4.5-dihydro-1.2.4-triazine | <chem>ClC1=C(C)C=C(S(NC2=NN=C(C3=CC=C([N+])([O-])=O)C=CC=C3)C(N2)=O)(=O)=O)C(SCC4=C(Cl)C=C(OCO5)C5=C4)=C1</chem> | 230      |
| 13 | 1.2.4-triazine                   | <chem>ClC1=C(C)C=C(S(NC2=NN=CC(C3=CC=CC(F)=C3)=N2)(=O)=O)C(SCC4=CC=CC=C4)=C1</chem>                              | 194      |
| 14 | 1.2.4-triazine                   | <chem>ClC1=C(C(NC2=CC=CC=C2)=O)C=C(S(NC3=NN=CC(C4=CC=C(OC)C=C4)=N3)(=O)=O)C(SCC5=CC=CC=C5)=C1</chem>             | 194      |
| 15 | 1.2.4-triazine                   | <chem>ClC1=C(C(NC2=CC=C(Cl)C=C2)=O)C=C(S(NC3=NN=CC(C4=CC=C(C(F)(F)F)C=C4)=N3)(=O)=O)C(SCC5=CC=CC=C5)=C1</chem>   | 195      |
| 16 | 1.2.4-triazine                   | <chem>ClC1=C(C(NC2=CC=C(Cl)C=C2)=O)C=C(S(NC3=NN=CC(C4=CC=C(OC)C=C4)=N3)(=O)=O)C(SCC5=CC=CC=C5)=C1</chem>         | 193      |
| 17 | 1.2.4-triazine                   | <chem>ClC1=C(C(NC2=CC=C(C)C=C2)=O)C=C(S(NC3=NN=CC(C4=CC=C(C(F)(F)F)C=C4)=N3)(=O)=O)C(SCC5=CC=CC=C5)=C1</chem>    | 268      |
| 18 | 1.2.4-triazine                   | <chem>ClC1=C(C(NC2=CC=C(C)C=C2)=O)C=C(S(NC3=NN=CC(C4=CC=C(OC)C=C4)=N3)(=O)=O)C(SCC5=CC=CC=C5)=C1</chem>          | 194      |
| 19 | 1.2.4-triazine                   | <chem>ClC1=C(C(NC2=CC=C(C)C=C2)=O)C=C(S(NC3=NN=CC(C4=CC(OC)=C(OC)C(OC)=C4)=N3)(=O)=O)C(SCC5=CC=CC=C5)=C</chem>   | 194      |
| 20 | 1.2.4-triazine                   | <chem>ClC1=C(C(NC2=CC=C(OC)C=C2)=O)C=C(S(NC3=NN=CC(C4=CC=C(OC)C=C4)=N3)(=O)=O)C(SCC5=CC=CC=C5)=C1</chem>         | 238      |
| 21 | 1.2.4-triazine                   | <chem>ClC1=C(C)C=C(S(NC2=NN=CC(C3=CC=C(C(F)(F)F)C=C3)=N2)(=O)=O)C(SCC4=CC=C(C(F)(F)F)C=C4)=C1</chem>             | 193      |
| 22 | 1.2.4-triazine                   | <chem>ClC1=C(C)C=C(S(NC2=NN=CC(C3=CC(F)=CC=C3)=N2)(=O)=O)C(SCC4=CC=CC5=C4C=CC=C5)=C1</chem>                      | 222      |
| 23 | 1.2.4-triazine                   | <chem>ClC1=C(C)C=C(S(NC2=NN=CC(C3=CC=C(OC)C=C3)=N2)(=O)=O)C(SCC4=CC=CC5=C4C=CC=C5)=C1</chem>                     | 222      |
| 24 | 1.2.4-triazine                   | <chem>ClC1=C(C)C=C(S(NC2=NN=CC(C3=CC(F)=CC=C3)=N2)(=O)=O)C(SCC4=CC=C(C(F)(F)F)C=C4)=C1</chem>                    | 194      |
| 25 | 1.2.4-triazine                   | <chem>ClC1=C(C)C=C(S(NC2=NN=CC(C3=CC=C(OC)C=C3)=N2)(=O)=O)C(SCC4=CC=C(C(F)(F)F)C=C4)=C1</chem>                   | 221      |
| 26 | N-acyl                           | <chem>ClC1=C(C)C=C(S(NC(C)=O)(=O)=O)C(SCC2=CC=CC3=C2C=CC=C3)=C1</chem>                                           | 222      |
| 27 | N-acyl                           | <chem>ClC1=C(C)C=C(S(NC(C)=O)(=O)=O)C(SCC3=CC=CC4=C3C=CC=C4)=C1</chem>                                           | 223      |



**Table S2.** The obtained retention times together with  $CHI_{IAM}$  for the target sulfonamides derivatives in IAM chromatography

| <b>No</b> | <b>tr<sub>1</sub></b> | <b>tr<sub>2</sub></b> | <b>tr<sub>3</sub></b> | <b>t<sub>m</sub></b> | <b>CHI</b> | <b>SD</b> |
|-----------|-----------------------|-----------------------|-----------------------|----------------------|------------|-----------|
| <b>1</b>  | 2.823                 | 2.801                 | 2.809                 | 2.811                | 19.2       | 0.01      |
| <b>2</b>  | 4.467                 | 4.463                 | 4.559                 | 4.496                | 45.0       | 0.05      |
| <b>3</b>  | 4.292                 | 4.308                 | 4.315                 | 4.305                | 42.0       | 0.01      |
| <b>4</b>  | 4.539                 | 4.569                 | 4.571                 | 4.560                | 45.9       | 0.02      |
| <b>5</b>  | 3.599                 | 3.610                 | 3.612                 | 3.607                | 31.4       | 0.01      |
| <b>6</b>  | 4.520                 | 4.530                 | 4.526                 | 4.525                | 45.4       | 0.01      |
| <b>7</b>  | 3.146                 | 3.148                 | 3.147                 | 3.147                | 24.3       | 0.01      |
| <b>8</b>  | 3.952                 | 3.952                 | 3.963                 | 3.956                | 36.7       | 0.01      |
| <b>9</b>  | 3.606                 | 3.613                 | 3.612                 | 3.610                | 31.4       | 0.01      |
| <b>10</b> | 4.115                 | 4.118                 | 4.103                 | 4.112                | 39.1       | 0.01      |
| <b>11</b> | 3.88                  | 3.878                 | 3.882                 | 3.880                | 35.5       | 0.01      |
| <b>12</b> | 3.856                 | 3.856                 | 3.856                 | 3.856                | 35.2       | 0.01      |
| <b>13</b> | 3.973                 | 3.981                 | 3.983                 | 3.979                | 37.1       | 0.01      |
| <b>14</b> | 3.891                 | 3.888                 | 3.907                 | 3.895                | 35.8       | 0.01      |
| <b>15</b> | 4.388                 | 4.399                 | 4.397                 | 4.395                | 43.4       | 0.01      |
| <b>16</b> | 4.163                 | 4.159                 | 4.158                 | 4.160                | 39.8       | 0.01      |
| <b>17</b> | 4.270                 | 4.258                 | 4.266                 | 4.265                | 41.4       | 0.01      |
| <b>18</b> | 4.015                 | 4.005                 | 4.005                 | 4.008                | 37.5       | 0.01      |
| <b>19</b> | 3.753                 | 3.748                 | 3.755                 | 3.752                | 33.6       | 0.01      |
| <b>20</b> | 3.842                 | 3.836                 | 3.830                 | 3.836                | 34.9       | 0.01      |
| <b>21</b> | 4.261                 | 4.249                 | 4.257                 | 4.256                | 41.3       | 0.01      |
| <b>22</b> | 4.315                 | 4.310                 | 4.317                 | 4.314                | 42.2       | 0.01      |
| <b>23</b> | 4.235                 | 4.248                 | 4.252                 | 4.245                | 41.1       | 0.01      |
| <b>24</b> | 4.062                 | 4.056                 | 4.060                 | 4.059                | 38.3       | 0.01      |
| <b>25</b> | 3.977                 | 4.004                 | 3.986                 | 3.989                | 37.2       | 0.01      |
| <b>26</b> | 3.555                 | 3.560                 | 3.558                 | 3.558                | 30.6       | 0.01      |
| <b>27</b> | 4.146                 | 4.149                 | 4.144                 | 4.146                | 39.6       | 0.01      |

**Table S3.** The obtained retention times together with  $CHI_{C18}$  for the target sulfonamides derivatives in  $C_{18}$  chromatography

| No | tr <sub>1</sub> | tr <sub>2</sub> | tr <sub>3</sub> | t <sub>m</sub> | CHI   | SD   |
|----|-----------------|-----------------|-----------------|----------------|-------|------|
| 1  | 10.645          | 10.610          | 10.610          | 10.622         | 56.7  | 0.02 |
| 2  | 18.690          | 18.746          | 18.762          | 18.733         | 97.5  | 0.04 |
| 3  | 18.247          | 18.185          | 18.176          | 18.203         | 94.8  | 0.04 |
| 4  | 20.098          | 20.274          | 20.225          | 20.199         | 104.8 | 0.09 |
| 5  | 15.857          | 15.830          | 15.818          | 15.835         | 82.9  | 0.02 |
| 6  | 18.208          | 18.178          | 18.147          | 18.178         | 94.7  | 0.03 |
| 7  | 12.020          | 12.014          | 12.041          | 12.025         | 63.8  | 0.01 |
| 8  | 15.826          | 15.806          | 15.778          | 15.803         | 82.8  | 0.02 |
| 9  | 13.738          | 13.722          | 13.677          | 13.712         | 72.3  | 0.03 |
| 10 | 16.152          | 16.129          | 16.073          | 16.118         | 84.3  | 0.04 |
| 11 | 15.361          | 15.338          | 15.259          | 15.319         | 80.3  | 0.05 |
| 12 | 15.154          | 15.105          | 15.070          | 15.110         | 79.3  | 0.04 |
| 13 | 14.888          | 14.856          | 14.768          | 14.837         | 77.9  | 0.06 |
| 14 | 15.090          | 15.040          | 14.951          | 15.027         | 78.9  | 0.07 |
| 15 | 17.836          | 17.774          | 17.643          | 17.751         | 92.5  | 0.10 |
| 16 | 16.502          | 16.453          | 16.309          | 16.421         | 85.9  | 0.10 |
| 17 | 17.307          | 17.259          | 17.087          | 17.218         | 89.9  | 0.12 |
| 18 | 15.837          | 15.791          | 15.787          | 15.805         | 82.8  | 0.03 |
| 19 | 15.203          | 15.176          | 15.175          | 15.185         | 79.7  | 0.02 |
| 20 | 14.730          | 14.690          | 14.658          | 14.693         | 77.2  | 0.04 |
| 21 | 17.585          | 17.546          | 17.531          | 17.554         | 91.6  | 0.03 |
| 22 | 16.065          | 16.221          | 16.230          | 16.172         | 84.6  | 0.09 |
| 23 | 16.482          | 16.450          | 16.469          | 16.467         | 86.1  | 0.02 |
| 24 | 16.797          | 16.650          | 16.773          | 16.740         | 87.5  | 0.08 |
| 25 | 16.134          | 16.127          | 16.144          | 16.135         | 84.4  | 0.01 |
| 26 | 16.168          | 16.144          | 15.895          | 16.069         | 84.1  | 0.15 |
| 27 | 13.870          | 13.864          | 13.936          | 13.890         | 73.1  | 0.04 |

**Table S4.** The obtained retention times together with log<sub>kw</sub> for the target sulfonamides derivatives in C<sub>8</sub> chromatography

| No | t <sub>1</sub><br>short<br>grad. | t <sub>2</sub><br>short<br>grad. | t <sub>3</sub><br>short<br>grad. | SD   | t <sub>m</sub><br>short<br>grad. | t <sub>1</sub><br>long<br>grad. | t <sub>2</sub><br>long<br>grad. | t <sub>3</sub><br>long<br>grad. | SD   | t <sub>m</sub><br>long<br>grad. | log <sub>kw</sub> |
|----|----------------------------------|----------------------------------|----------------------------------|------|----------------------------------|---------------------------------|---------------------------------|---------------------------------|------|---------------------------------|-------------------|
| 1  | 4.411                            | 4.106                            | 4.117                            | 0.17 | 4.211                            | 4.260                           | 4.136                           | 4.142                           | 0.07 | 4.179                           | 2.980             |
| 2  | 10.053                           | 10.081                           | 10.092                           | 0.02 | 10.075                           | 13.819                          | 13.814                          | 13.924                          | 0.06 | 13.852                          | 4.682             |
| 3  | 9.789                            | 9.808                            | 9.823                            | 0.02 | 9.807                            | 13.302                          | 13.317                          | 13.358                          | 0.03 | 13.326                          | 4.593             |
| 4  | 10.721                           | 10.779                           | 10.800                           | 0.04 | 10.767                           | 15.131                          | 15.120                          | 15.163                          | 0.02 | 15.138                          | 4.898             |
| 5  | 8.106                            | 8.144                            | 8.144                            | 0.02 | 8.131                            | 10.096                          | 10.102                          | 10.157                          | 0.03 | 10.118                          | 4.055             |
| 6  | 9.804                            | 9.811                            | 9.829                            | 0.01 | 9.815                            | 13.400                          | 13.403                          | 13.452                          | 0.03 | 13.418                          | 4.609             |
| 7  | 5.411                            | 5.414                            | 5.418                            | 0.00 | 5.414                            | 5.768                           | 5.795                           | 5.830                           | 0.03 | 5.798                           | 3.300             |
| 8  | 8.327                            | 8.315                            | 8.293                            | 0.02 | 8.312                            | 11.004                          | 11.035                          | 11.027                          | 0.02 | 11.022                          | 4.206             |
| 9  | 6.656                            | 6.628                            | 6.628                            | 0.02 | 6.637                            | 7.948                           | 7.944                           | 7.986                           | 0.02 | 7.959                           | 3.692             |
| 10 | 8.335                            | 8.336                            | 8.325                            | 0.01 | 8.332                            | 11.012                          | 11.078                          | 11.067                          | 0.04 | 11.052                          | 4.211             |
| 11 | 7.901                            | 7.854                            | 7.865                            | 0.02 | 7.873                            | 10.219                          | 10.200                          | 10.280                          | 0.04 | 10.233                          | 4.074             |
| 12 | 7.886                            | 7.850                            | 7.839                            | 0.02 | 7.858                            | 10.208                          | 10.195                          | 10.234                          | 0.02 | 10.212                          | 4.070             |
| 13 | 7.577                            | 7.548                            | 7.538                            | 0.02 | 7.554                            | 9.630                           | 9.630                           | 9.630                           | 0.00 | 9.630                           | 4.030             |
| 14 | 7.738                            | 7.710                            | 7.702                            | 0.02 | 7.717                            | 9.955                           | 9.952                           | 9.964                           | 0.01 | 9.957                           | 4.130             |
| 15 | 9.489                            | 9.464                            | 9.456                            | 0.02 | 9.470                            | 13.327                          | 13.294                          | 13.305                          | 0.02 | 13.309                          | 4.530             |
| 16 | 8.545                            | 8.521                            | 8.513                            | 0.02 | 8.526                            | 11.518                          | 11.510                          | 11.521                          | 0.01 | 11.516                          | 4.380             |
| 17 | 9.163                            | 9.134                            | 9.113                            | 0.03 | 9.137                            | 12.717                          | 12.704                          | 12.711                          | 0.01 | 12.711                          | 4.490             |
| 18 | 8.170                            | 8.150                            | 8.144                            | 0.01 | 8.155                            | 10.803                          | 10.796                          | 10.814                          | 0.01 | 10.804                          | 4.280             |
| 19 | 7.837                            | 7.822                            | 7.824                            | 0.01 | 7.828                            | 10.189                          | 10.204                          | 10.194                          | 0.01 | 10.196                          | 4.068             |
| 20 | 7.547                            | 7.536                            | 7.515                            | 0.02 | 7.533                            | 9.582                           | 9.595                           | 9.586                           | 0.01 | 9.588                           | 4.020             |
| 21 | 9.364                            | 9.350                            | 9.329                            | 0.02 | 9.348                            | 13.057                          | 13.048                          | 13.057                          | 0.01 | 13.054                          | 4.440             |
| 22 | 8.519                            | 8.506                            | 8.488                            | 0.02 | 8.504                            | 11.436                          | 11.440                          | 11.441                          | 0.00 | 11.439                          | 4.276             |
| 23 | 8.577                            | 8.556                            | 8.560                            | 0.01 | 8.564                            | 11.493                          | 11.498                          | 11.509                          | 0.01 | 11.500                          | 4.120             |
| 24 | 8.439                            | 8.420                            | 8.408                            | 0.02 | 8.422                            | 11.319                          | 11.308                          | 11.320                          | 0.01 | 11.316                          | 4.256             |
| 25 | 8.385                            | 8.365                            | 8.358                            | 0.01 | 8.369                            | 11.182                          | 11.184                          | 11.197                          | 0.01 | 11.188                          | 4.260             |
| 26 | 6.558                            | 6.559                            | 6.543                            | 0.01 | 6.553                            | 7.732                           | 7.745                           | 7.744                           | 0.01 | 7.740                           | 3.655             |
| 27 | 8.545                            | 8.537                            | 8.539                            | 0.00 | 8.540                            | 11.444                          | 11.457                          | 11.460                          | 0.01 | 11.454                          | 4.279             |

**Table S5.** The obtained retention times together with log<sub>kw</sub> for the target sulfonamides derivatives in Cyanopropyl chromatography

| <b>No.</b> | <b>t<sub>1</sub><br/>short<br/>grad.</b> | <b>t<sub>2</sub><br/>short<br/>grad.</b> | <b>t<sub>3</sub><br/>short.<br/>grad.</b> | <b>SD</b> | <b>t<sub>m</sub><br/>short<br/>grad.</b> | <b>t<sub>1</sub><br/>long<br/>grad.</b> | <b>t<sub>2</sub><br/>long<br/>grad.</b> | <b>t<sub>3</sub><br/>long<br/>grad.</b> | <b>SD</b> | <b>t<sub>m</sub><br/>long<br/>grad.</b> | <b>log<sub>kw</sub></b> |
|------------|------------------------------------------|------------------------------------------|-------------------------------------------|-----------|------------------------------------------|-----------------------------------------|-----------------------------------------|-----------------------------------------|-----------|-----------------------------------------|-------------------------|
| <b>1</b>   | 2.481                                    | 2.494                                    | 2.473                                     | 0.01      | 2.483                                    | 3.625                                   | 3.842                                   | 3.866                                   | 0.13      | 3.778                                   | 1.580                   |
| <b>2</b>   | 8.571                                    | 9.049                                    | 9.219                                     | 0.34      | 8.946                                    | 17.815                                  | 17.875                                  | 17.920                                  | 0.05      | 17.870                                  | 4.040                   |
| <b>3</b>   | 6.840                                    | 6.889                                    | 6.906                                     | 0.03      | 6.878                                    | 13.381                                  | 13.346                                  | 13.317                                  | 0.03      | 13.348                                  | 2.966                   |
| <b>4</b>   | 8.675                                    | 8.749                                    | 8.781                                     | 0.05      | 8.735                                    | 17.187                                  | 17.238                                  | 17.224                                  | 0.03      | 17.216                                  | 3.628                   |
| <b>5</b>   | 5.011                                    | 5.000                                    | 4.983                                     | 0.01      | 4.998                                    | 9.524                                   | 9.473                                   | 9.365                                   | 0.08      | 9.454                                   | 2.300                   |
| <b>6</b>   | 6.698                                    | 6.692                                    | 6.665                                     | 0.02      | 6.685                                    | 12.972                                  | 12.925                                  | 12.847                                  | 0.06      | 12.915                                  | 2.892                   |
| <b>7</b>   | 3.046                                    | 3.101                                    | 3.111                                     | 0.04      | 3.086                                    | 5.438                                   | 5.420                                   | 5.369                                   | 0.04      | 5.409                                   | 1.780                   |
| <b>8</b>   | 3.962                                    | 3.935                                    | 3.924                                     | 0.02      | 3.940                                    | 8.839                                   | 8.766                                   | 8.726                                   | 0.06      | 8.777                                   | 2.010                   |
| <b>9</b>   | 3.004                                    | 2.980                                    | 2.968                                     | 0.02      | 2.984                                    | 6.559                                   | 6.659                                   | 6.452                                   | 0.10      | 6.557                                   | 1.850                   |
| <b>10</b>  | 4.170                                    | 4.129                                    | 4.118                                     | 0.03      | 4.139                                    | 9.231                                   | 9.158                                   | 9.113                                   | 0.06      | 9.167                                   | 2.251                   |
| <b>11</b>  | 3.822                                    | 3.773                                    | 3.762                                     | 0.03      | 3.786                                    | 8.523                                   | 8.451                                   | 8.408                                   | 0.06      | 8.461                                   | 2.130                   |
| <b>12</b>  | 3.906                                    | 3.841                                    | 3.841                                     | 0.04      | 3.863                                    | 8.708                                   | 8.653                                   | 8.594                                   | 0.06      | 8.652                                   | 2.162                   |
| <b>13</b>  | 3.581                                    | 3.545                                    | 3.535                                     | 0.02      | 3.554                                    | 7.986                                   | 7.905                                   | 7.859                                   | 0.06      | 7.917                                   | 2.037                   |
| <b>14</b>  | 4.075                                    | 4.050                                    | 4.038                                     | 0.02      | 4.054                                    | 9.032                                   | 9.001                                   | 8.986                                   | 0.02      | 9.006                                   | 2.020                   |
| <b>15</b>  | 5.301                                    | 5.232                                    | 5.219                                     | 0.04      | 5.251                                    | 11.505                                  | 11.455                                  | 11.399                                  | 0.05      | 11.453                                  | 2.642                   |
| <b>16</b>  | 4.830                                    | 4.775                                    | 4.758                                     | 0.04      | 4.788                                    | 10.515                                  | 10.454                                  | 10.399                                  | 0.06      | 10.456                                  | 2.471                   |
| <b>17</b>  | 4.976                                    | 4.937                                    | 4.921                                     | 0.03      | 4.945                                    | 10.929                                  | 10.879                                  | 10.830                                  | 0.05      | 10.879                                  | 2.544                   |
| <b>18</b>  | 4.475                                    | 4.440                                    | 4.424                                     | 0.03      | 4.446                                    | 9.858                                   | 9.802                                   | 9.728                                   | 0.07      | 9.796                                   | 2.358                   |
| <b>19</b>  | 4.011                                    | 3.975                                    | 3.969                                     | 0.02      | 3.985                                    | 9.012                                   | 8.962                                   | 8.912                                   | 0.05      | 8.962                                   | 2.216                   |
| <b>20</b>  | 4.015                                    | 3.990                                    | 3.976                                     | 0.02      | 3.994                                    | 8.983                                   | 8.930                                   | 8.891                                   | 0.05      | 8.935                                   | 2.211                   |
| <b>21</b>  | 4.863                                    | 4.825                                    | 4.813                                     | 0.03      | 4.834                                    | 10.694                                  | 10.643                                  | 10.594                                  | 0.05      | 10.644                                  | 2.110                   |
| <b>22</b>  | 4.451                                    | 4.423                                    | 4.417                                     | 0.02      | 4.430                                    | 9.844                                   | 9.772                                   | 9.724                                   | 0.06      | 9.780                                   | 2.356                   |
| <b>23</b>  | 4.898                                    | 4.869                                    | 4.871                                     | 0.02      | 4.879                                    | 10.570                                  | 10.488                                  | 10.430                                  | 0.07      | 10.496                                  | 2.478                   |
| <b>24</b>  | 4.224                                    | 4.195                                    | 4.180                                     | 0.02      | 4.200                                    | 9.370                                   | 9.329                                   | 9.262                                   | 0.05      | 9.320                                   | 2.277                   |
| <b>25</b>  | 4.434                                    | 4.411                                    | 4.397                                     | 0.02      | 4.414                                    | 9.676                                   | 9.647                                   | 9.560                                   | 0.06      | 9.628                                   | 2.330                   |
| <b>26</b>  | 3.027                                    | 3.013                                    | 3.012                                     | 0.01      | 3.017                                    | 6.362                                   | 6.336                                   | 6.252                                   | 0.06      | 6.317                                   | 1.763                   |
| <b>27</b>  | 4.359                                    | 4.333                                    | 4.309                                     | 0.03      | 4.334                                    | 9.601                                   | 9.543                                   | 9.453                                   | 0.07      | 9.532                                   | 2.313                   |

**Table S6.** The obtained retention times together with log<sub>kw</sub> for the target sulfonamides derivatives in Phenyl chromatography

| No | t <sub>1</sub><br>short<br>grad. | t <sub>2</sub><br>short<br>grad. | t <sub>3</sub><br>short<br>grad. | SD   | t <sub>m</sub> | t <sub>1</sub><br>long<br>grad. | t <sub>2</sub><br>long<br>grad. | t <sub>3</sub><br>long<br>grad. | SD   | t <sub>m</sub> | logkw |
|----|----------------------------------|----------------------------------|----------------------------------|------|----------------|---------------------------------|---------------------------------|---------------------------------|------|----------------|-------|
| 1  | 3.830                            | 3.777                            | 3.774                            | 0.03 | 3.794          | 3.670                           | 3.692                           | 3.675                           | 0.01 | 3.679          | 2.620 |
| 2  | 11.023                           | 11.390                           | 11.544                           | 0.27 | 11.319         | 13.971                          | 14.045                          | 13.878                          | 0.08 | 13.965         | 6.221 |
| 3  | 10.568                           | 10.453                           | 10.455                           | 0.07 | 10.492         | 12.130                          | 12.058                          | 12.031                          | 0.05 | 12.073         | 5.556 |
| 4  | 12.356                           | 13.281                           | 13.453                           | 0.59 | 13.030         | 17.414                          | 17.332                          | 17.118                          | 0.15 | 17.288         | 7.389 |
| 5  | 7.813                            | 7.748                            | 7.731                            | 0.04 | 7.764          | 7.908                           | 7.860                           | 7.842                           | 0.03 | 7.870          | 4.079 |
| 6  | 10.203                           | 10.129                           | 10.125                           | 0.04 | 10.152         | 11.635                          | 11.605                          | 11.572                          | 0.03 | 11.604         | 5.391 |
| 7  | 4.654                            | 4.614                            | 4.612                            | 0.02 | 4.627          | 4.560                           | 4.545                           | 4.523                           | 0.02 | 4.543          | 2.810 |
| 8  | 7.541                            | 7.472                            | 7.445                            | 0.05 | 7.486          | 7.845                           | 7.802                           | 7.754                           | 0.05 | 7.800          | 4.490 |
| 9  | 5.010                            | 4.961                            | 4.945                            | 0.03 | 4.972          | 4.944                           | 4.921                           | 4.886                           | 0.03 | 4.917          | 2.880 |
| 10 | 7.833                            | 7.772                            | 7.750                            | 0.04 | 7.785          | 8.240                           | 8.193                           | 8.150                           | 0.05 | 8.194          | 4.193 |
| 11 | 7.042                            | 6.986                            | 6.967                            | 0.04 | 6.998          | 7.181                           | 7.150                           | 7.104                           | 0.04 | 7.145          | 3.824 |
| 12 | 7.201                            | 7.139                            | 7.126                            | 0.04 | 7.155          | 7.385                           | 7.357                           | 7.310                           | 0.04 | 7.351          | 3.897 |
| 13 | 6.359                            | 6.301                            | 6.283                            | 0.04 | 6.314          | 6.347                           | 6.309                           | 6.286                           | 0.03 | 6.314          | 3.532 |
| 14 | 7.232                            | 7.182                            | 7.168                            | 0.03 | 7.194          | 7.425                           | 7.390                           | 7.340                           | 0.04 | 7.385          | 4.310 |
| 15 | 9.338                            | 9.273                            | 9.252                            | 0.04 | 9.288          | 10.744                          | 10.706                          | 10.657                          | 0.04 | 10.702         | 5.074 |
| 16 | 8.352                            | 8.301                            | 8.293                            | 0.03 | 8.315          | 9.042                           | 9.003                           | 8.957                           | 0.04 | 9.001          | 4.476 |
| 17 | 8.970                            | 8.931                            | 8.916                            | 0.03 | 8.939          | 10.135                          | 10.093                          | 10.046                          | 0.04 | 10.091         | 4.540 |
| 18 | 7.894                            | 7.841                            | 7.824                            | 0.04 | 7.853          | 8.329                           | 8.295                           | 8.254                           | 0.04 | 8.293          | 4.228 |
| 19 | 7.345                            | 7.296                            | 7.274                            | 0.04 | 7.305          | 7.595                           | 7.562                           | 7.498                           | 0.05 | 7.552          | 3.967 |
| 20 | 6.959                            | 6.920                            | 6.896                            | 0.03 | 6.925          | 7.085                           | 7.043                           | 7.005                           | 0.04 | 7.044          | 3.789 |
| 21 | 8.654                            | 8.617                            | 8.588                            | 0.03 | 8.620          | 9.590                           | 9.552                           | 9.512                           | 0.04 | 9.551          | 4.480 |
| 22 | 7.915                            | 7.881                            | 7.853                            | 0.03 | 7.883          | 8.401                           | 8.375                           | 8.329                           | 0.04 | 8.368          | 4.254 |
| 23 | 8.230                            | 8.199                            | 8.185                            | 0.02 | 8.205          | 8.773                           | 8.732                           | 8.852                           | 0.06 | 8.786          | 4.401 |
| 24 | 7.563                            | 7.540                            | 7.517                            | 0.02 | 7.540          | 7.932                           | 7.882                           | 7.877                           | 0.03 | 7.897          | 4.088 |
| 25 | 7.633                            | 7.609                            | 7.581                            | 0.03 | 7.608          | 6.065                           | 7.926                           | 7.972                           | 1.09 | 7.321          | 3.886 |
| 26 | 4.959                            | 4.933                            | 4.911                            | 0.02 | 4.934          | 4.854                           | 4.844                           | 4.848                           | 0.01 | 4.849          | 2.870 |
| 27 | 8.210                            | 8.166                            | 8.140                            | 0.04 | 8.172          | 8.758                           | 8.709                           | 8.827                           | 0.06 | 8.765          | 4.460 |

**Table S7.** List of molecular descriptors used to build QSRR and QSAR models.

| <b>Descriptor</b> | <b>Full name</b>                                                              | <b>Block</b>                |
|-------------------|-------------------------------------------------------------------------------|-----------------------------|
| JGI6              | mean topological charge index of order 6                                      | 2D autocorrelations         |
| SIC1              | Structural Information Content index (neighborhood symmetry of 1-order)       | Information indices         |
| VE2sign_X         | average coefficient of the last eigenvector from chi matrix                   | 2D matrix-based descriptors |
| SHED_LL           | SHED Lipophilic-Lipophilic                                                    | Pharmacophore descriptors   |
| Mor32p            | signal 32 / weighted by polarizability                                        | 3D-MoRSE descriptors        |
| Mor14i            | signal 14 / weighted by ionization potential                                  | 3D-MoRSE descriptors        |
| VE2sign_X         | average coefficient of the last eigenvector from chi matrix                   | 2D matrix-based descriptors |
| VE1sign_D/Dt      | coefficient sum of the last eigenvector from distance/detour matrix           | 2D matrix-based descriptors |
| L3s               | 3rd component size directional WHIM index / weighted by I-state               | WHIM descriptors            |
| SIC1              | Structural Information Content index (neighborhood symmetry of 1-order)       | Information indices         |
| Mor19m            | signal 19 / weighted by mass                                                  | 3D-MoRSE descriptors        |
| SpMin2_Bh(p)      | smallest eigenvalue n. 2 of Burden matrix weighted by polarizability          | Burden eigenvalues          |
| R6p+              | R maximal autocorrelation of lag 6 / weighted by polarizability               | GETAWAY descriptors         |
| MATS4e            | Moran autocorrelation of lag 4 weighted by Sanderson electronegativity        | 2D autocorrelations         |
| SpMin2_Bh(m)      | smallest eigenvalue n. 2 of Burden matrix weighted by mass                    | Burden eigenvalues          |
| B02[N-N]          | Presence/absence of N – N at topological distance 2                           | 2D Atom Pairs               |
| RTs+              | R maximal index / weighted by I-state                                         | GETAWAY descriptors         |
| HOMT              | HOMA total                                                                    | Geometrical descriptors     |
| Gu                | total symmetry index / unweighted                                             | WHIM descriptors            |
| H-049             | H attached to C3(sp3)/C2(sp2)/C3(sp2)/C3(sp)                                  | Atom-centred fragments      |
| Mor08u            | signal 08 / unweighted                                                        | 3D-MoRSE descriptors        |
| R3u               | R autocorrelation of lag 3 / unweighted                                       | GETAWAY descriptors         |
| R5p+              | R maximal autocorrelation of lag 5 / weighted by polarizability               | GETAWAY descriptors         |
| Mor25u            | signal 25 / unweighted                                                        | 3D-MoRSE descriptors        |
| G2p               | 2nd component symmetry directional WHIM index / weighted by polarizability    | WHIM descriptors            |
| WHALES00_IR       | WHALES Isolation-Remoteness ratio (IR)                                        | WHALES descriptors          |
| TDB05r            | 3D Topological distance based descriptors – lag 5 weighted by covalent radius | 3D autocorrelations         |
| RPCG              | relative positive charge                                                      | Charge descriptors          |

**Table S8.** The values of alvaDesc Molecular Descriptors for target compound

| No. | JGI6  | SIC1  | VE2sign_X | SHED_LL | Mor32p | Mor14i | VE2sign_X | VE1sign_D/Dt | L3s   | SIC1  | Mor19m | SpMin2_Bh(p) | R6p+  | MATS4e | SpMin2_Bh(m) | B02[N-N] | RTs+  | HOMT   | Gu    | H-049 | Mor08u | R3u   | R5p+  | Mor25u |
|-----|-------|-------|-----------|---------|--------|--------|-----------|--------------|-------|-------|--------|--------------|-------|--------|--------------|----------|-------|--------|-------|-------|--------|-------|-------|--------|
| 1   | 0.020 | 0.658 | 0.018     | 7.823   | -0.492 | -0.402 | 0.018     | 0.081        | 1.288 | 0.658 | -0.174 | 1.958        | 0.017 | 0.068  | 1.902        | 1.000    | 3.344 | 15.838 | 0.178 | 1.000 | 0.543  | 1.609 | 0.023 | 1.374  |
| 2   | 0.021 | 0.543 | 0.009     | 11.877  | -0.524 | -0.452 | 0.009     | 0.253        | 1.667 | 0.543 | 0.127  | 2.031        | 0.018 | -0.198 | 1.996        | 0.000    | 2.974 | 20.364 | 0.193 | 1.000 | -0.478 | 1.772 | 0.022 | 1.788  |
| 3   | 0.022 | 0.605 | 0.004     | 11.635  | -0.498 | 0.020  | 0.004     | 0.255        | 1.848 | 0.605 | -0.057 | 2.032        | 0.020 | -0.186 | 1.996        | 0.000    | 2.087 | 20.311 | 0.176 | 1.000 | 0.055  | 1.752 | 0.022 | 1.761  |
| 4   | 0.023 | 0.585 | 0.003     | 12.176  | -0.508 | -0.541 | 0.003     | 0.256        | 1.899 | 0.585 | 0.248  | 2.033        | 0.024 | -0.168 | 1.996        | 0.000    | 2.351 | 20.224 | 0.190 | 0.000 | -1.115 | 1.754 | 0.020 | 2.118  |
| 5   | 0.021 | 0.589 | 0.012     | 10.127  | -0.354 | -0.448 | 0.012     | 0.214        | 1.544 | 0.589 | -0.102 | 1.976        | 0.017 | -0.218 | 1.970        | 1.000    | 3.171 | 17.334 | 0.177 | 0.000 | -0.196 | 1.675 | 0.045 | 1.356  |
| 6   | 0.024 | 0.542 | 0.005     | 10.873  | -0.468 | -0.219 | 0.005     | 0.105        | 1.353 | 0.542 | 0.244  | 1.951        | 0.036 | -0.234 | 1.957        | 0.000    | 3.091 | 15.835 | 0.187 | 0.000 | 0.390  | 1.750 | 0.026 | 1.394  |
| 7   | 0.021 | 0.643 | 0.023     | 7.584   | -0.510 | -0.774 | 0.023     | 0.077        | 1.343 | 0.643 | -0.115 | 1.976        | 0.018 | 0.119  | 1.938        | 1.000    | 3.068 | 15.829 | 0.190 | 0.000 | 0.042  | 1.590 | 0.022 | 1.361  |
| 8   | 0.020 | 0.675 | 0.002     | 15.237  | -0.525 | -0.989 | 0.002     | 0.041        | 3.375 | 0.675 | 0.305  | 2.009        | 0.009 | -0.059 | 2.020        | 1.000    | 2.787 | 18.154 | 0.175 | 0.000 | 0.176  | 1.677 | 0.020 | 1.645  |
| 9   | 0.019 | 0.678 | 0.005     | 11.969  | -0.391 | -0.799 | 0.005     | 0.072        | 3.448 | 0.678 | -0.077 | 2.023        | 0.019 | 0.072  | 1.954        | 1.000    | 1.953 | 19.771 | 0.174 | 0.000 | 1.093  | 1.647 | 0.024 | 1.404  |
| 10  | 0.018 | 0.623 | 0.006     | 16.200  | -0.368 | -0.518 | 0.006     | 0.160        | 3.593 | 0.623 | 0.161  | 2.043        | 0.012 | 0.168  | 2.024        | 1.000    | 1.622 | 22.431 | 0.167 | 0.000 | -0.152 | 1.820 | 0.022 | 1.773  |
| 11  | 0.018 | 0.623 | 0.006     | 16.200  | -0.427 | -0.141 | 0.006     | 0.160        | 2.907 | 0.623 | -0.058 | 2.043        | 0.012 | 0.168  | 2.024        | 1.000    | 1.738 | 22.446 | 0.166 | 0.000 | -0.343 | 1.817 | 0.022 | 1.613  |
| 12  | 0.019 | 0.726 | 0.002     | 15.455  | -0.440 | -0.193 | 0.002     | 0.156        | 2.677 | 0.726 | -0.112 | 2.020        | 0.013 | -0.069 | 1.960        | 1.000    | 2.623 | 19.666 | 0.172 | 0.000 | 1.546  | 1.610 | 0.020 | 1.748  |
| 13  | 0.018 | 0.659 | 0.003     | 14.266  | -0.542 | -0.099 | 0.003     | 0.125        | 2.836 | 0.659 | -0.175 | 1.998        | 0.016 | 0.053  | 2.007        | 1.000    | 2.035 | 20.458 | 0.177 | 1.000 | -0.051 | 1.682 | 0.023 | 1.297  |
| 14  | 0.016 | 0.616 | 0.007     | 14.630  | -0.551 | 0.409  | 0.007     | 0.147        | 2.976 | 0.616 | 0.555  | 2.017        | 0.014 | 0.126  | 2.015        | 1.000    | 1.622 | 23.483 | 0.170 | 1.000 | -0.388 | 1.755 | 0.016 | 1.424  |
| 15  | 0.019 | 0.634 | 0.002     | 15.693  | -0.656 | -0.588 | 0.002     | 0.172        | 2.057 | 0.634 | 0.232  | 2.018        | 0.017 | -0.060 | 2.024        | 1.000    | 2.701 | 23.363 | 0.163 | 1.000 | 0.139  | 1.750 | 0.017 | 1.617  |
| 16  | 0.017 | 0.633 | 0.005     | 15.251  | -0.552 | 0.252  | 0.005     | 0.177        | 2.116 | 0.633 | 0.440  | 2.013        | 0.017 | 0.076  | 2.013        | 1.000    | 1.716 | 23.368 | 0.174 | 1.000 | 0.203  | 1.687 | 0.017 | 1.748  |
| 17  | 0.019 | 0.633 | 0.002     | 15.772  | -0.393 | -0.562 | 0.002     | 0.172        | 2.954 | 0.633 | 0.267  | 2.028        | 0.016 | -0.008 | 2.028        | 1.000    | 2.256 | 23.531 | 0.164 | 1.000 | 0.329  | 1.819 | 0.019 | 1.715  |
| 18  | 0.017 | 0.628 | 0.005     | 15.339  | -0.485 | -0.145 | 0.005     | 0.177        | 3.261 | 0.628 | 0.201  | 2.024        | 0.015 | 0.142  | 2.028        | 1.000    | 2.119 | 23.545 | 0.162 | 1.000 | 0.652  | 1.747 | 0.019 | 1.603  |
| 19  | 0.017 | 0.629 | 0.004     | 14.669  | -0.403 | -0.116 | 0.004     | 0.175        | 2.887 | 0.629 | -0.172 | 2.027        | 0.014 | 0.131  | 2.028        | 1.000    | 1.856 | 22.960 | 0.176 | 1.000 | -0.551 | 1.593 | 0.016 | 1.836  |
| 20  | 0.017 | 0.626 | 0.006     | 14.211  | -0.582 | 0.481  | 0.006     | 0.205        | 2.102 | 0.626 | -0.395 | 2.019        | 0.013 | 0.076  | 2.013        | 1.000    | 1.529 | 23.577 | 0.171 | 1.000 | 1.234  | 1.664 | 0.016 | 2.136  |
| 21  | 0.021 | 0.662 | 0.003     | 14.245  | -0.677 | -1.836 | 0.003     | 0.093        | 2.953 | 0.662 | -0.290 | 2.013        | 0.013 | -0.157 | 2.020        | 1.000    | 2.528 | 20.375 | 0.177 | 1.000 | 0.307  | 1.608 | 0.021 | 1.431  |
| 22  | 0.018 | 0.636 | 0.002     | 15.107  | -0.697 | -0.086 | 0.002     | 0.107        | 2.506 | 0.636 | -0.053 | 2.052        | 0.012 | 0.064  | 2.007        | 1.000    | 0.924 | 24.734 | 0.178 | 1.000 | 0.521  | 1.696 | 0.017 | 1.846  |
| 23  | 0.018 | 0.631 | 0.004     | 14.591  | -0.739 | 0.045  | 0.004     | 0.168        | 2.464 | 0.631 | 0.276  | 2.053        | 0.014 | 0.080  | 2.013        | 1.000    | 1.302 | 24.549 | 0.166 | 1.000 | 0.877  | 1.596 | 0.015 | 2.122  |
| 24  | 0.019 | 0.690 | 0.002     | 14.266  | -0.654 | -1.500 | 0.002     | 0.008        | 2.773 | 0.690 | -0.285 | 2.010        | 0.014 | -0.101 | 2.007        | 1.000    | 2.588 | 20.399 | 0.176 | 1.000 | 0.190  | 1.639 | 0.023 | 1.378  |
| 25  | 0.019 | 0.680 | 0.001     | 13.743  | -0.646 | -1.086 | 0.001     | 0.038        | 2.955 | 0.680 | -0.282 | 2.010        | 0.013 | -0.090 | 2.013        | 1.000    | 2.523 | 20.354 | 0.185 | 1.000 | 0.665  | 1.538 | 0.020 | 1.651  |
| 26  | 0.020 | 0.640 | 0.010     | 10.589  | -0.415 | 0.235  | 0.010     | 0.324        | 2.284 | 0.640 | 0.534  | 2.010        | 0.014 | 0.147  | 1.954        | 0.000    | 1.452 | 15.544 | 0.161 | 0.000 | 0.663  | 1.548 | 0.020 | 1.653  |
| 27  | 0.018 | 0.579 | 0.005     | 15.251  | -0.250 | 1.362  | 0.005     | 0.238        | 4.250 | 0.579 | 0.199  | 2.021        | 0.013 | 0.151  | 2.039        | 0.000    | 1.113 | 18.757 | 0.174 | 0.000 | 0.154  | 1.814 | 0.022 | 1.778  |

Figure S1. William's plots and y-randomization tests ( $Q^2$  vs.  $R^2$ ) generated for each model. The numbers correspond to the next stationary phases A) IAM. B) C<sub>18</sub>. C) C<sub>8</sub>. D) CN . E) Ph and F) pIC<sub>50</sub>

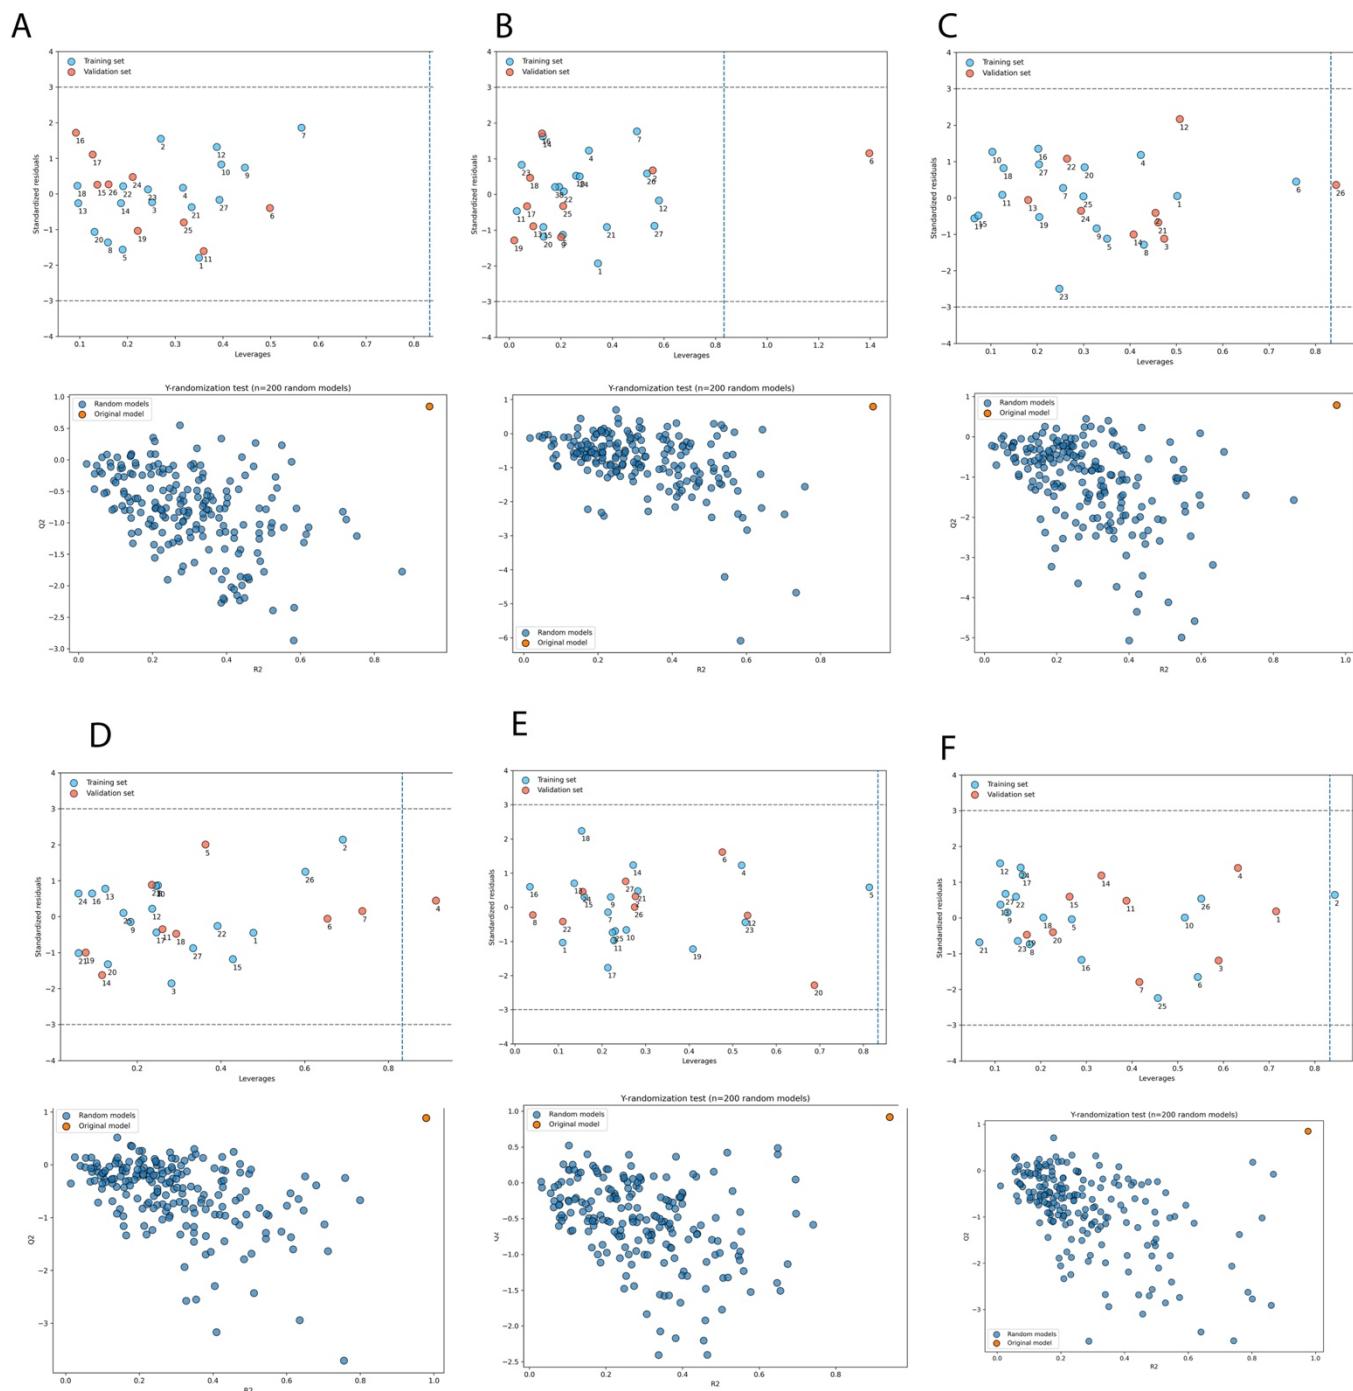



**Spectrum S1**  $^1\text{H}$  NMR of compound **1** (500 MHz. DMSO- $\text{d}_6$ ).  
**Spectrum S2**  $^{13}\text{C}$  NMR of compound **1** (125 MHz. DMSO- $\text{d}_6$ ).  
**Spectrum S3**  $^1\text{H}$  NMR of compound **2** (500 MHz. DMSO- $\text{d}_6$ ).  
**Spectrum S4**  $^{13}\text{C}$  NMR of compound **2** (125 MHz. DMSO- $\text{d}_6$ ).  
**Spectrum S5**  $^1\text{H}$  NMR of compound **3** (500 MHz. DMSO- $\text{d}_6$ ).  
**Spectrum S6**  $^{13}\text{C}$  NMR of compound **3** (125 MHz. DMSO- $\text{d}_6$ ).  
**Spectrum S7**  $^1\text{H}$  NMR of compound **4** (500 MHz. DMSO- $\text{d}_6$ ).  
**Spectrum S8**  $^1\text{H}$  NMR of compound **5** (200 MHz. DMSO- $\text{d}_6$ ).  
**Spectrum S9**  $^{13}\text{C}$  NMR of compound **5** (50 MHz. DMSO- $\text{d}_6$ ).  
**Spectrum S10**  $^1\text{H}$  NMR of compound **6** (500 MHz. DMSO- $\text{d}_6$ ).  
**Spectrum S11**  $^{13}\text{C}$  NMR of compound **6** (125 MHz. DMSO- $\text{d}_6$ ).  
**Spectrum S12**  $^1\text{H}$  NMR of compound **7** (500 MHz. DMSO- $\text{d}_6$ ).  
**Spectrum S13**  $^{13}\text{C}$  NMR of compound **7** (125 MHz. DMSO- $\text{d}_6$ ).  
**Spectrum S14**  $^1\text{H}$  NMR of compound **8** (500 MHz. DMSO- $\text{d}_6$ ).  
**Spectrum S15**  $^{13}\text{C}$  NMR of compound **8** (125 MHz. DMSO- $\text{d}_6$ ).  
**Spectrum S16**  $^1\text{H}$  NMR of compound **9** (500 MHz. DMSO- $\text{d}_6$ ).  
**Spectrum S17**  $^{13}\text{C}$  NMR of compound **9** (125 MHz. DMSO- $\text{d}_6$ ).  
**Spectrum S18**  $^1\text{H}$  NMR of compound **10** (500 MHz. DMSO- $\text{d}_6$ ).  
**Spectrum S19**  $^{13}\text{C}$  NMR of compound **10** (125 MHz. DMSO- $\text{d}_6$ ).  
**Spectrum S20**  $^1\text{H}$  NMR of compound **11** (200 MHz. DMSO- $\text{d}_6$ ).  
**Spectrum S21**  $^1\text{H}$  NMR of compound **12** (200 MHz. DMSO- $\text{d}_6$ ).  
**Spectrum S22**  $^1\text{H}$  NMR of compound **13** (200 MHz. DMSO- $\text{d}_6$ ).  
**Spectrum S23**  $^{13}\text{C}$  NMR of compound **13** (50 MHz. DMSO- $\text{d}_6$ ).  
**Spectrum S24**  $^1\text{H}$  NMR of compound **14** (200 MHz. DMSO- $\text{d}_6$ ).  
**Spectrum S25**  $^1\text{H}$  NMR of compound **15** (200 MHz. DMSO- $\text{d}_6$ ).  
**Spectrum S26**  $^{13}\text{C}$  NMR of compound **15** (50 MHz. DMSO- $\text{d}_6$ ).  
**Spectrum S27**  $^1\text{H}$  NMR of compound **16** (200 MHz. DMSO- $\text{d}_6$ ).  
**Spectrum S28**  $^1\text{H}$  NMR of compound **17** (200 MHz. DMSO- $\text{d}_6$ ).  
**Spectrum S29**  $^{13}\text{C}$  NMR of compound **17** (50 MHz. DMSO- $\text{d}_6$ ).  
**Spectrum S30**  $^1\text{H}$  NMR of compound **18** (200 MHz. DMSO- $\text{d}_6$ ).  
**Spectrum S31**  $^{13}\text{C}$  NMR of compound **18** (50 MHz. DMSO- $\text{d}_6$ ).  
**Spectrum S32**  $^1\text{H}$  NMR of compound **19** (200 MHz. DMSO- $\text{d}_6$ ).  
**Spectrum S33**  $^{13}\text{C}$  NMR of compound **19** (50 MHz. DMSO- $\text{d}_6$ ).  
**Spectrum S34**  $^1\text{H}$  NMR of compound **20** (200 MHz. DMSO- $\text{d}_6$ ).  
**Spectrum S35**  $^{13}\text{C}$  NMR of compound **20** (50 MHz. DMSO- $\text{d}_6$ ).  
**Spectrum S36**  $^1\text{H}$  NMR of compound **21** (500 MHz. DMSO- $\text{d}_6$ ).  
**Spectrum S37**  $^1\text{H}$  NMR of compound **22** (500 MHz. DMSO- $\text{d}_6$ ).  
**Spectrum S38**  $^1\text{H}$  NMR of compound **23** (500 MHz. DMSO- $\text{d}_6$ ).  
**Spectrum S39**  $^{13}\text{C}$  NMR of compound **23** (125 MHz. DMSO- $\text{d}_6$ ).  
**Spectrum S40**  $^1\text{H}$  NMR of compound **24** (500 MHz. DMSO- $\text{d}_6$ ).  
**Spectrum S41**  $^1\text{H}$  NMR of compound **25** (500 MHz. DMSO- $\text{d}_6$ ).  
**Spectrum S42**  $^{13}\text{C}$  NMR of compound **25** (125 MHz. DMSO- $\text{d}_6$ ).  
**Spectrum S43**  $^1\text{H}$  NMR of compound **26** (200 MHz. DMSO- $\text{d}_6$ ).  
**Spectrum S44**  $^1\text{H}$  NMR of compound **27** (200 MHz. DMSO- $\text{d}_6$ ).  
**Spectrum S45**  $^{13}\text{C}$  NMR of compound **27** (50 MHz. DMSO- $\text{d}_6$ ).

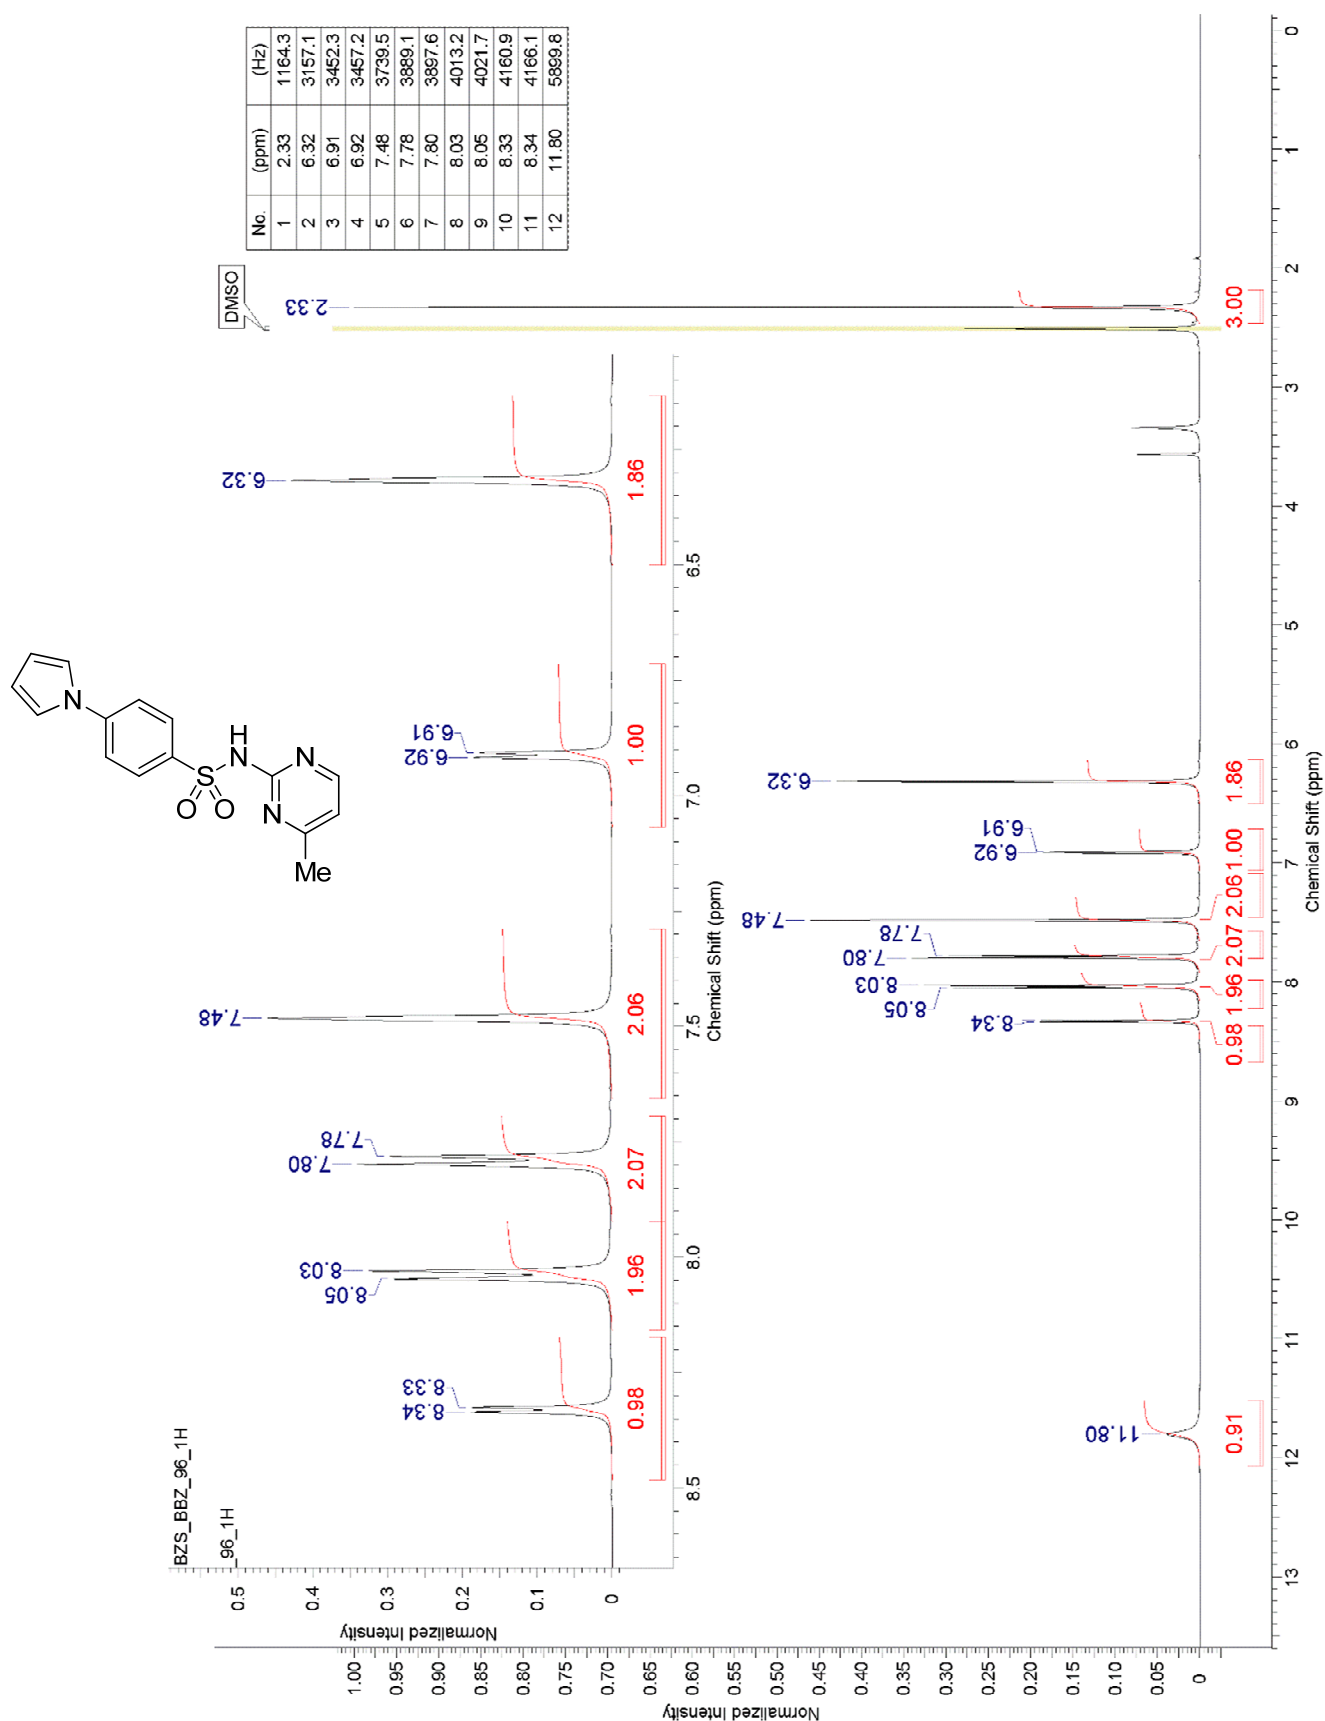

**Spectrum S1. <sup>1</sup>H NMR of compd 1 (500 MHz, DMSO-*d*<sub>6</sub>).**

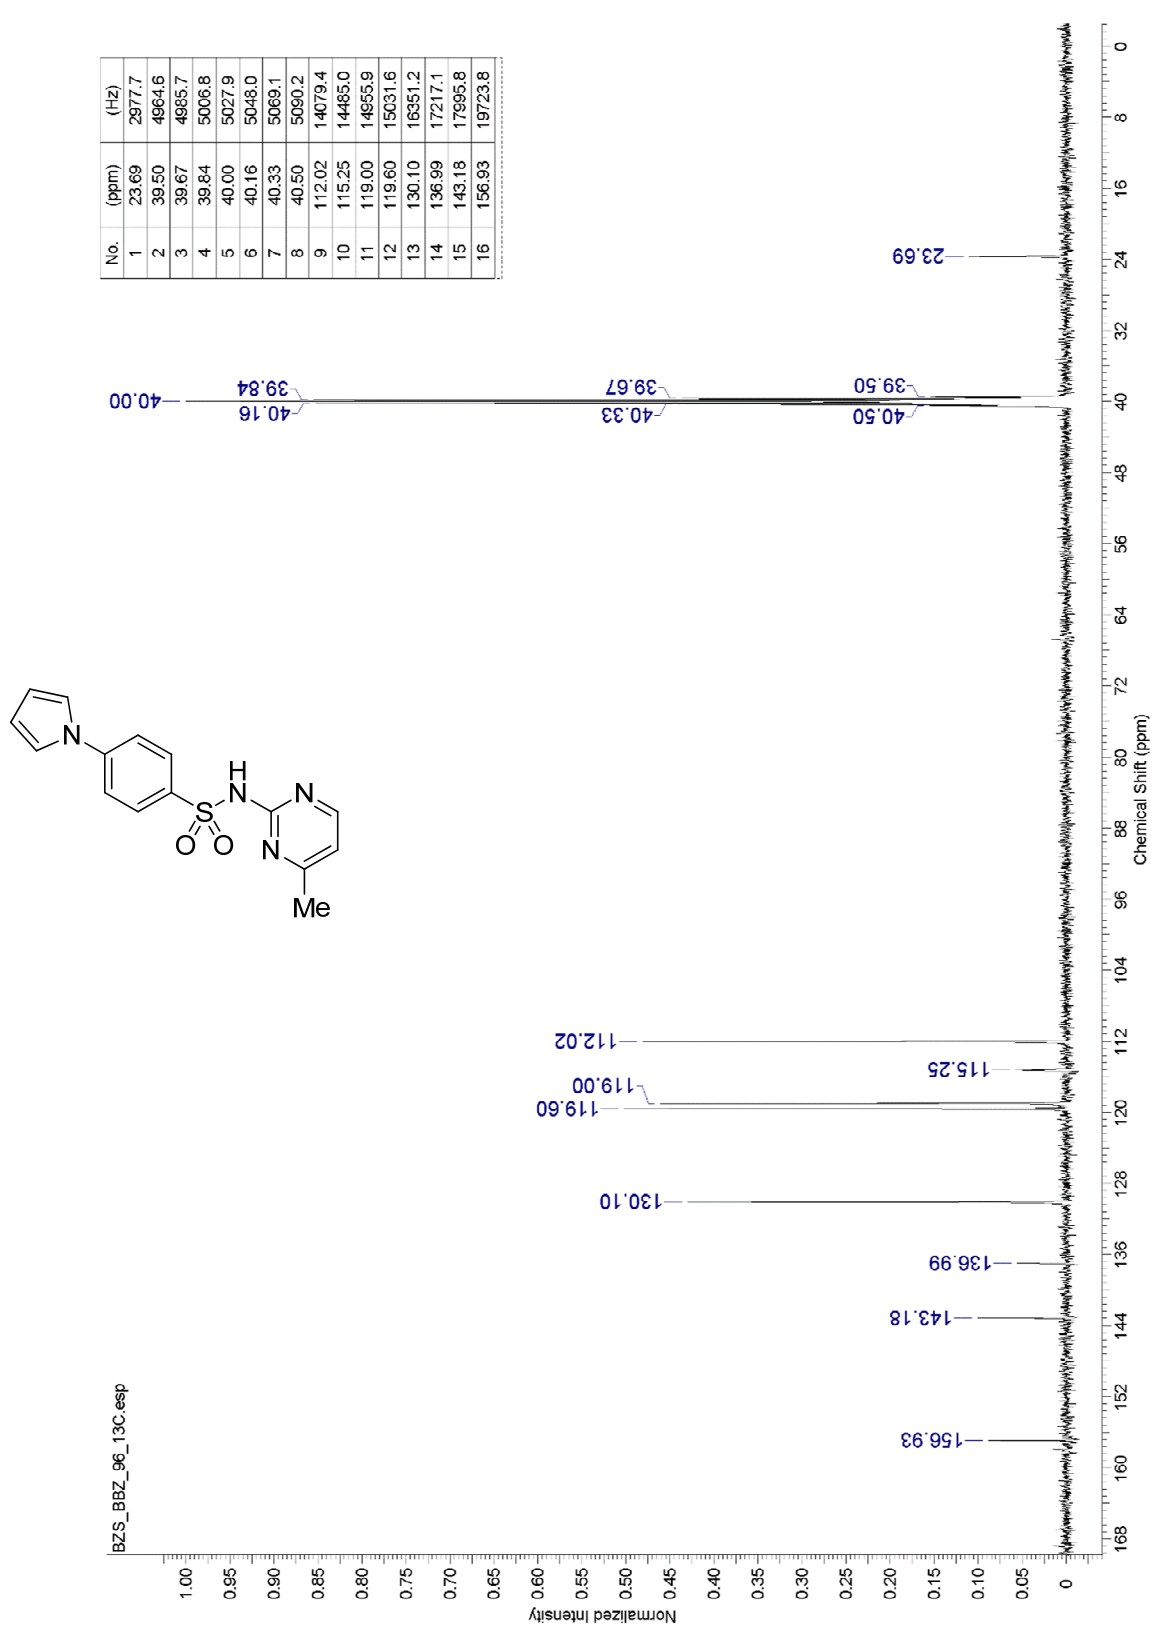

**Spectrum S2.**  $^{13}\text{C}$  NMR of compd **1** (125 MHz.  $\text{DMSO-}d_6$ ).

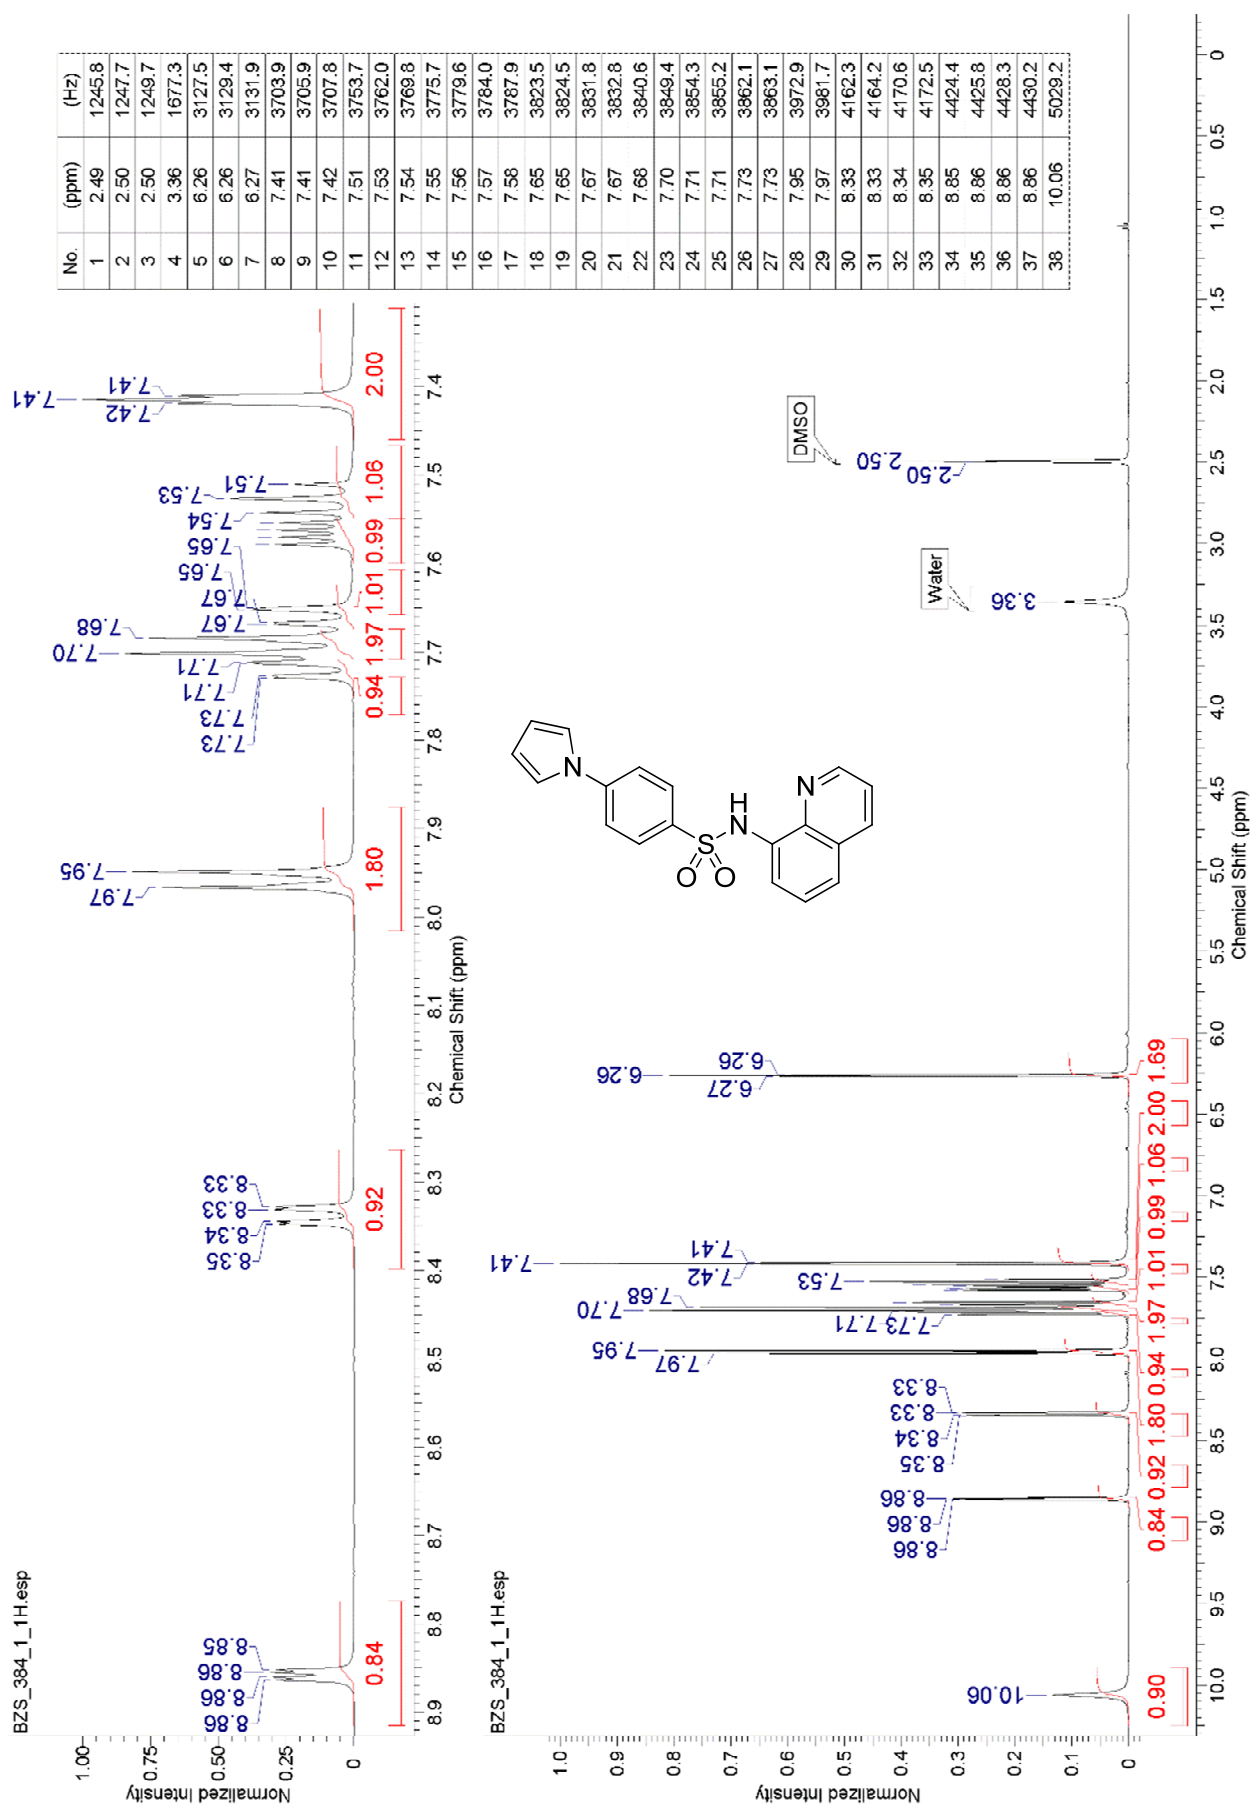

Spectrum S3.  $^1\text{H}$  NMR of compd 2 (500 MHz.  $\text{DMSO-}d_6$ ).

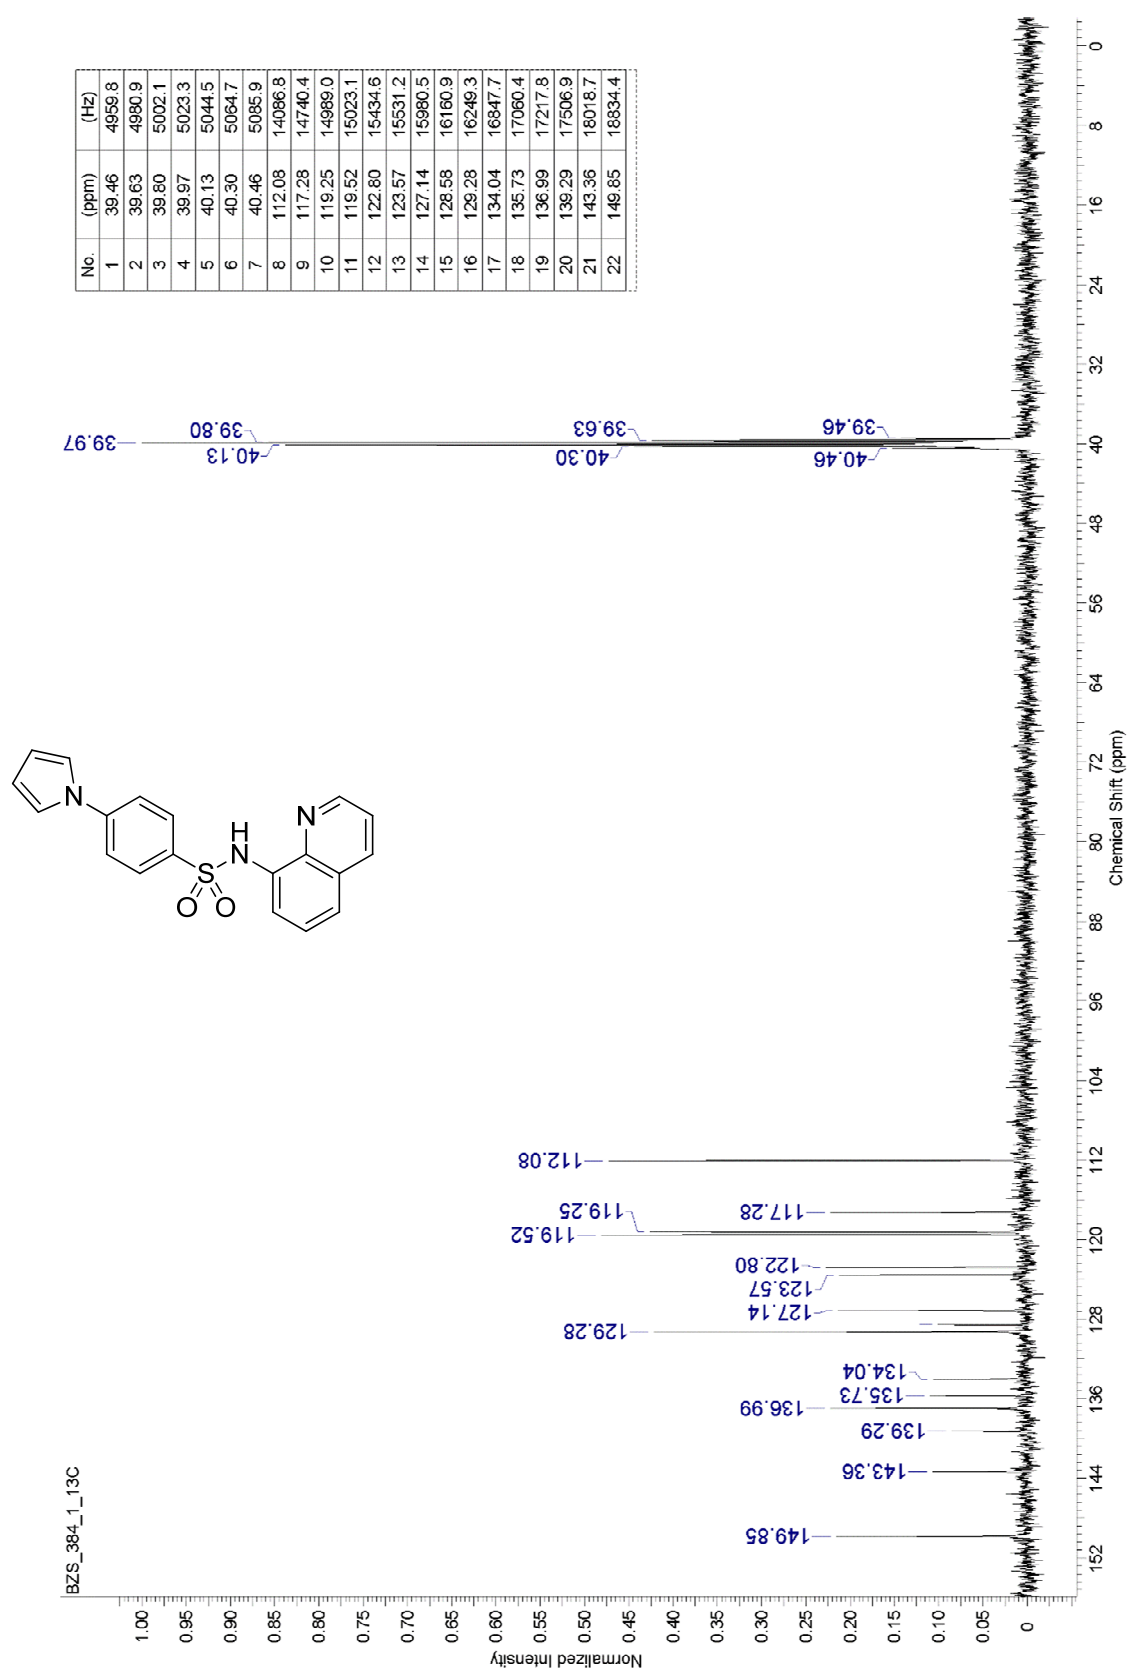

**Spectrum S4.** <sup>13</sup>C NMR of compd **2** (125 MHz, DMSO-*d*<sub>6</sub>).

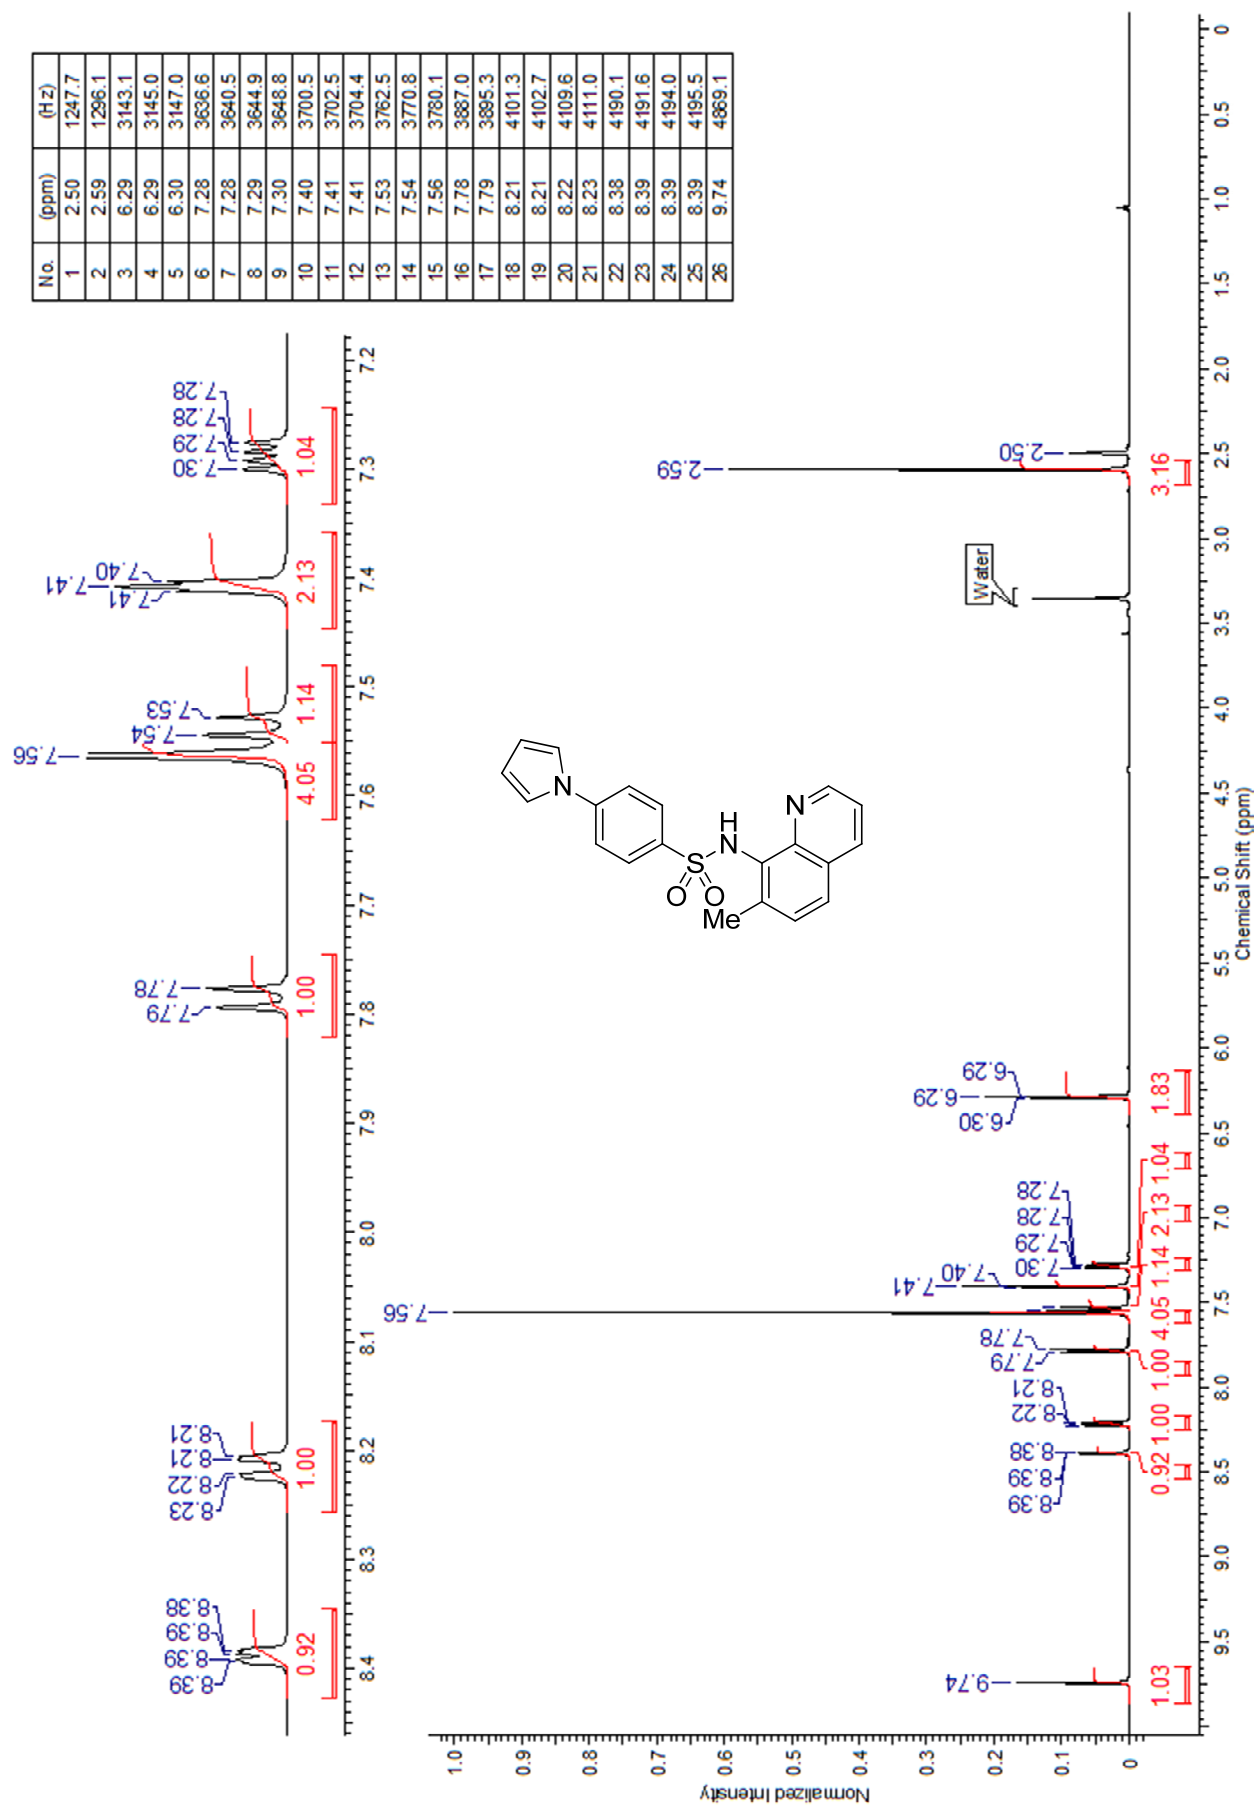

Spectrum S5. <sup>1</sup>H NMR of compd **3** (500 MHz, DMSO-*d*<sub>6</sub>).







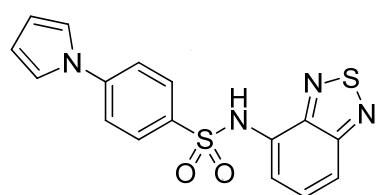

01-100576-DMSO-30

CPDAM LINES FOR TH<sup>a</sup> 11.25  
PL= 572.9 REP= 489.9

| EX      | FREQ   | PPM     | INTENSITY |
|---------|--------|---------|-----------|
| 2200.48 | 11.044 | 53.312  |           |
| 1535.77 | 7.950  | 58.606  |           |
| 1530.75 | 7.940  | 82.154  |           |
| 1555.42 | 7.779  | 109.929 |           |
| 1543.16 | 7.747  | 73.506  |           |
| 1535.61 | 7.680  | 33.230  |           |
| 1528.29 | 7.642  | 43.063  |           |
| 1520.04 | 7.581  | 27.878  |           |
| 1493.37 | 7.488  | 124.170 |           |
| 1260.43 | 6.323  | 104.639 |           |
| 714.15  | 3.571  | 15.565  |           |
| 675.22  | 3.377  | 38.068  |           |
| 592.89  | 2.515  | 38.072  |           |
| 385.25  | 1.525  | 11.923  |           |

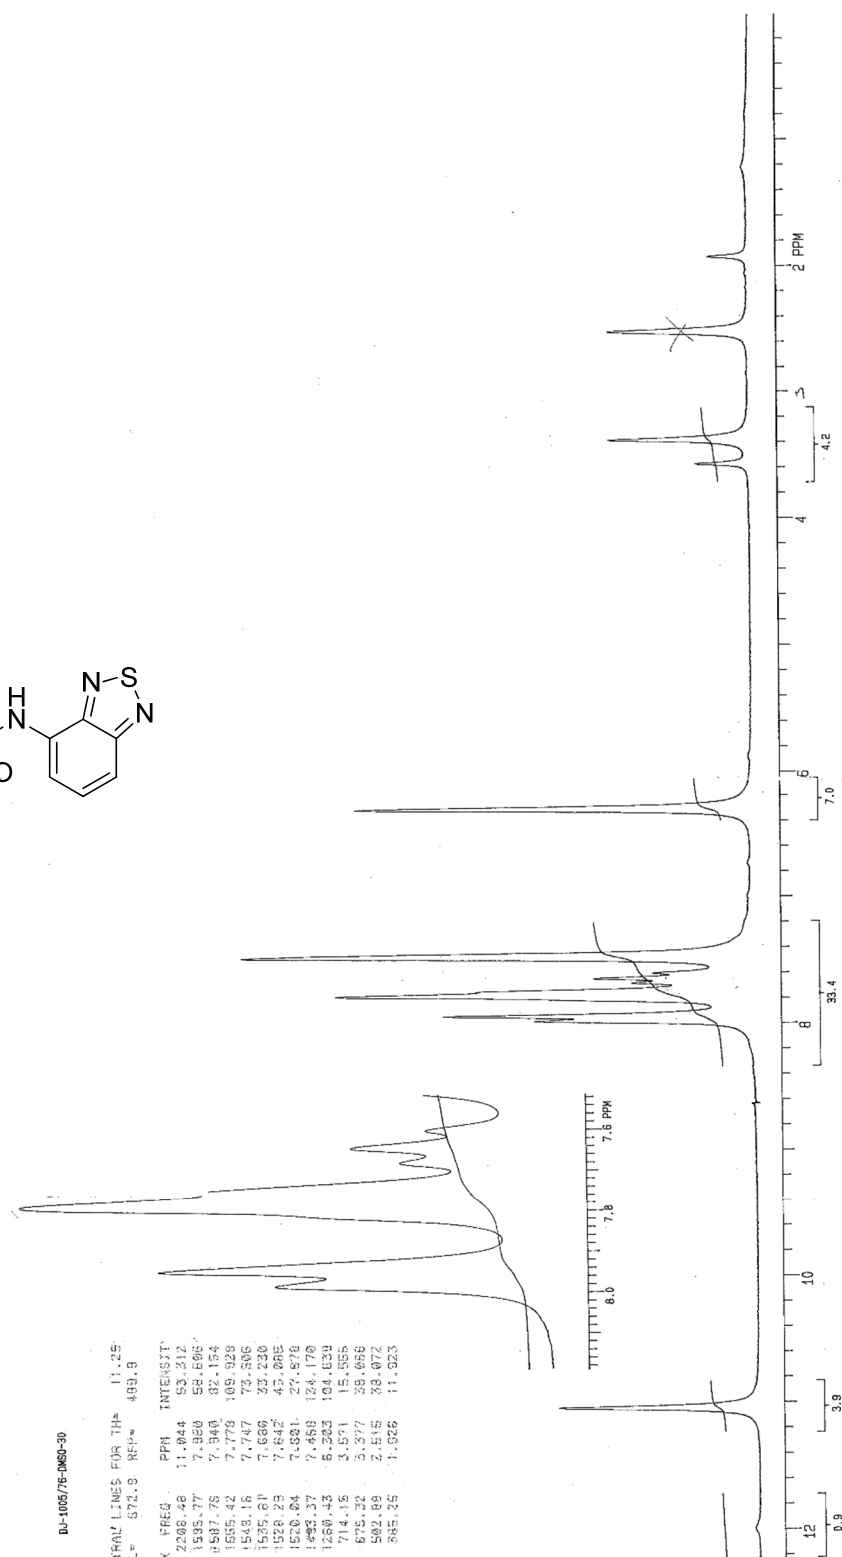

Spectrum S8. <sup>1</sup>H NMR of compd 5 (200 MHz, DMSO-d<sub>6</sub>).

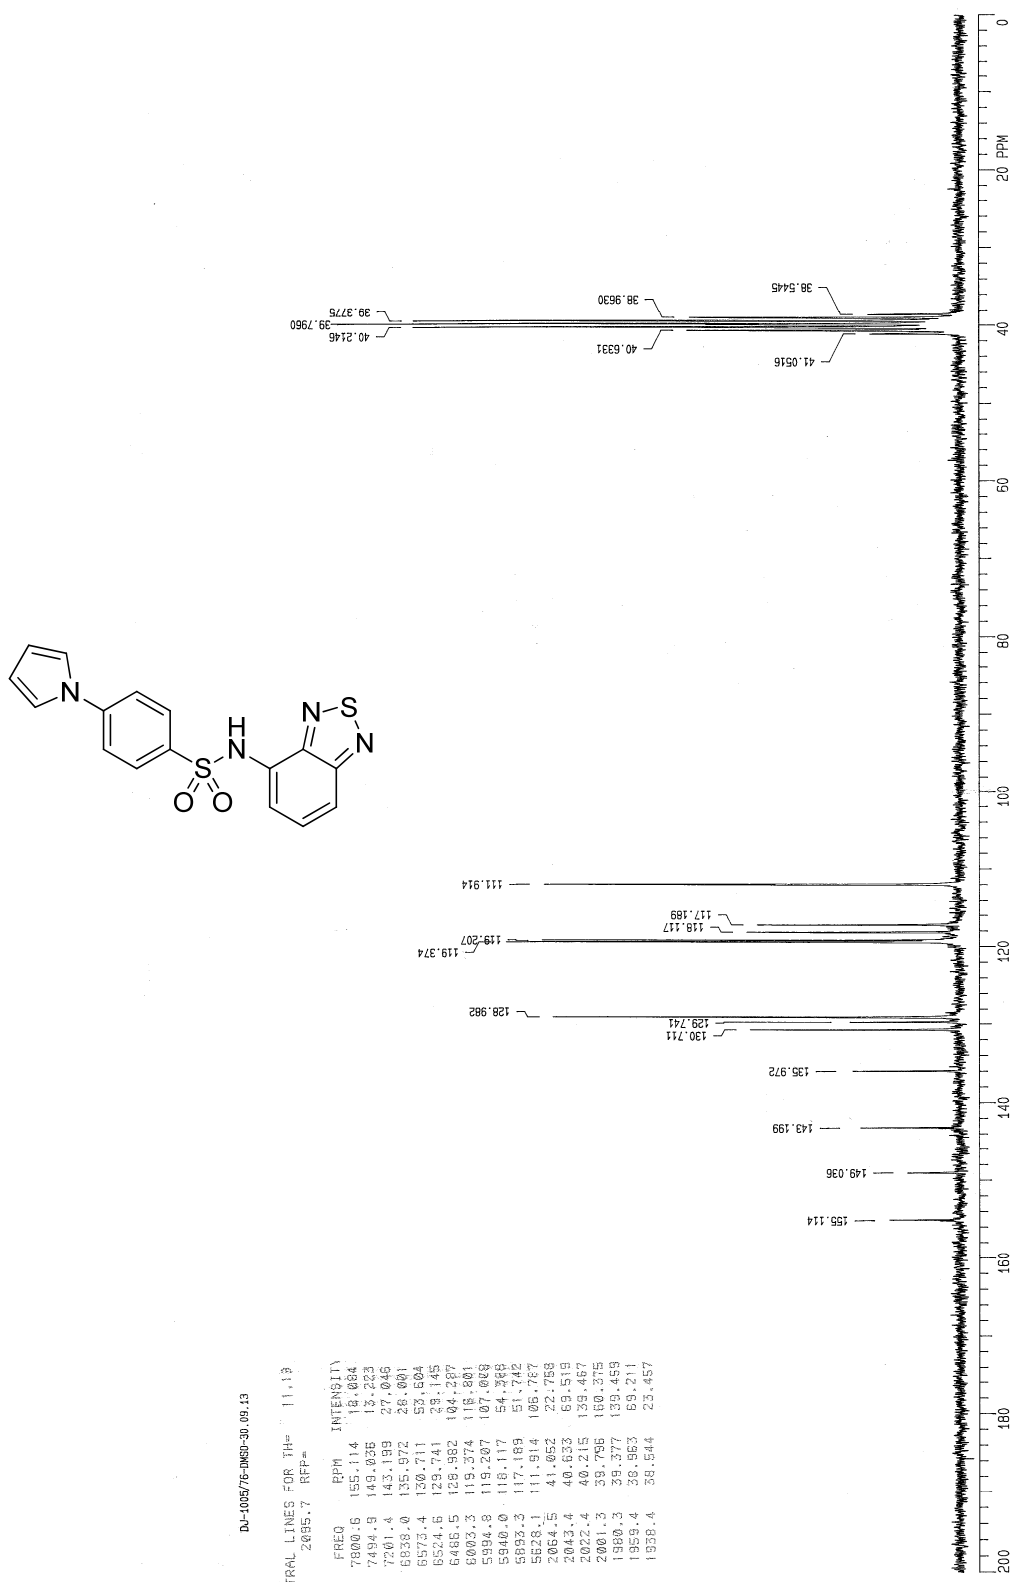

**Spectrum S9.** <sup>13</sup>C NMR of compd **5** (125 MHz, DMSO-*d*<sub>6</sub>).

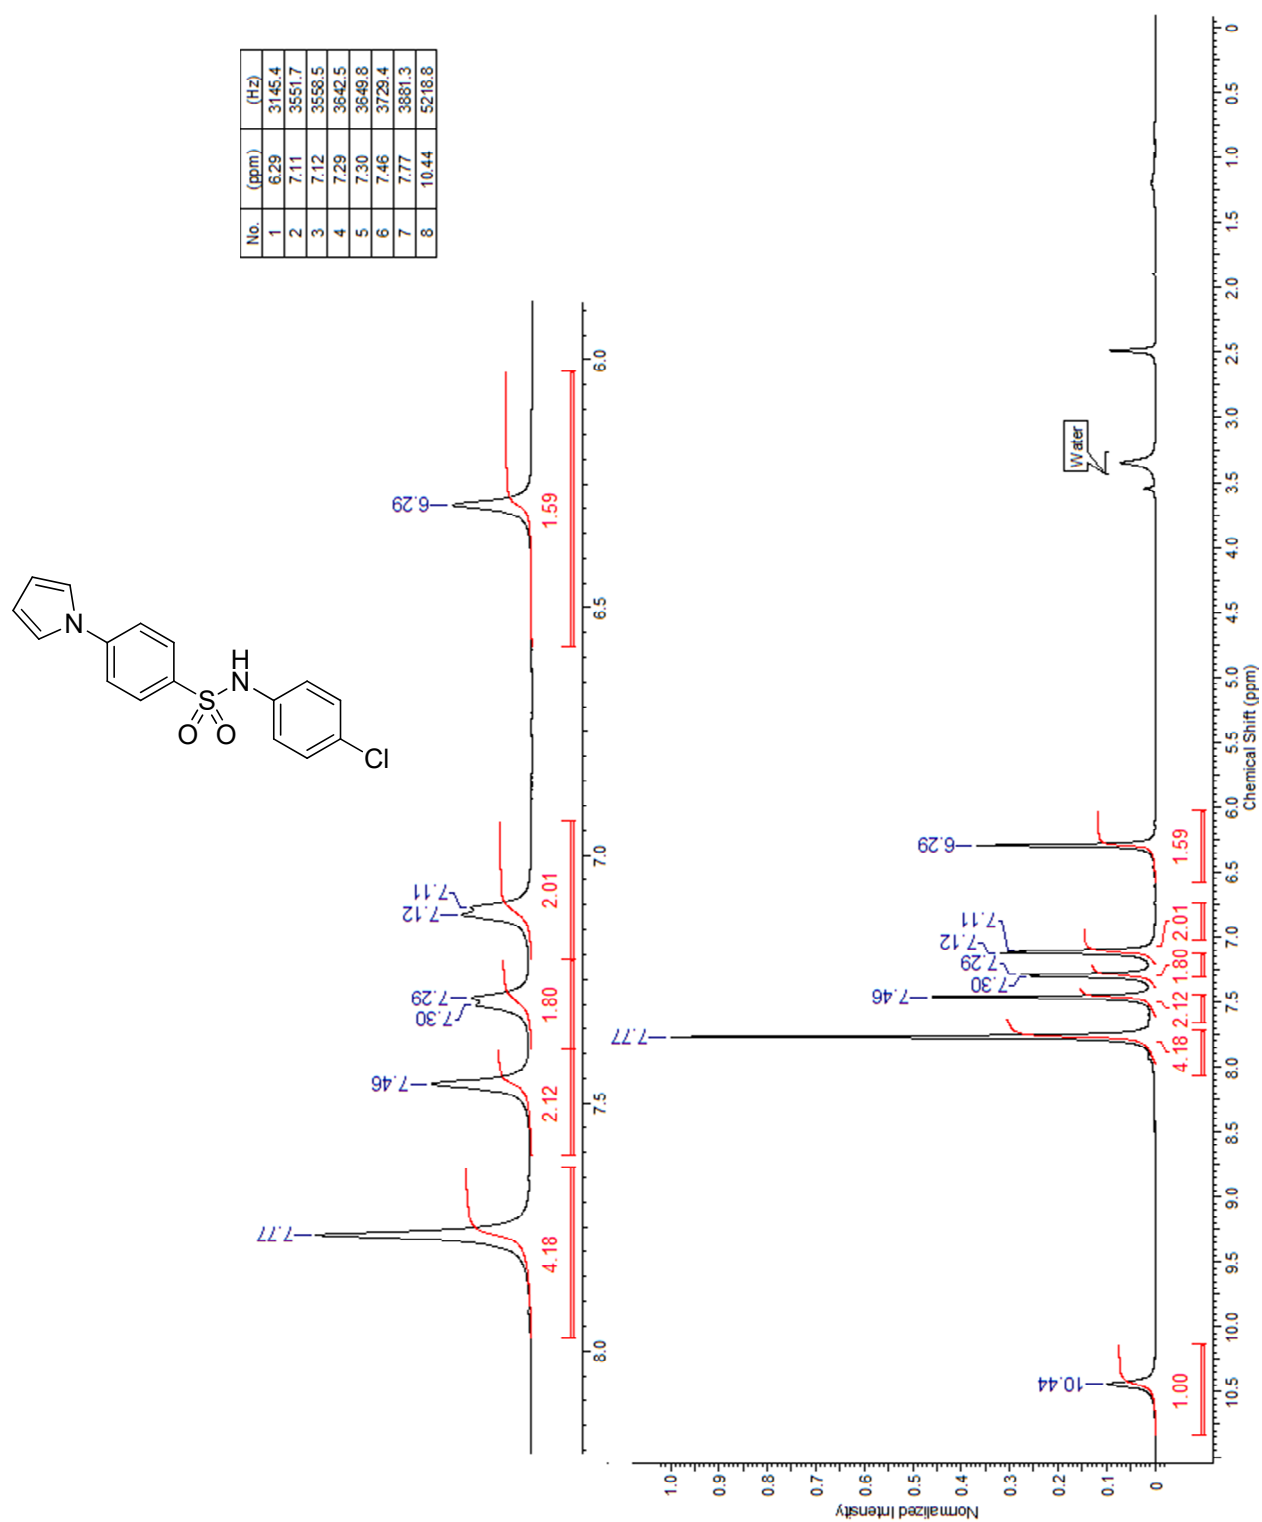

**Spectrum S10.** <sup>1</sup>H NMR of compd **6** (500 MHz, DMSO-*d*<sub>6</sub>).

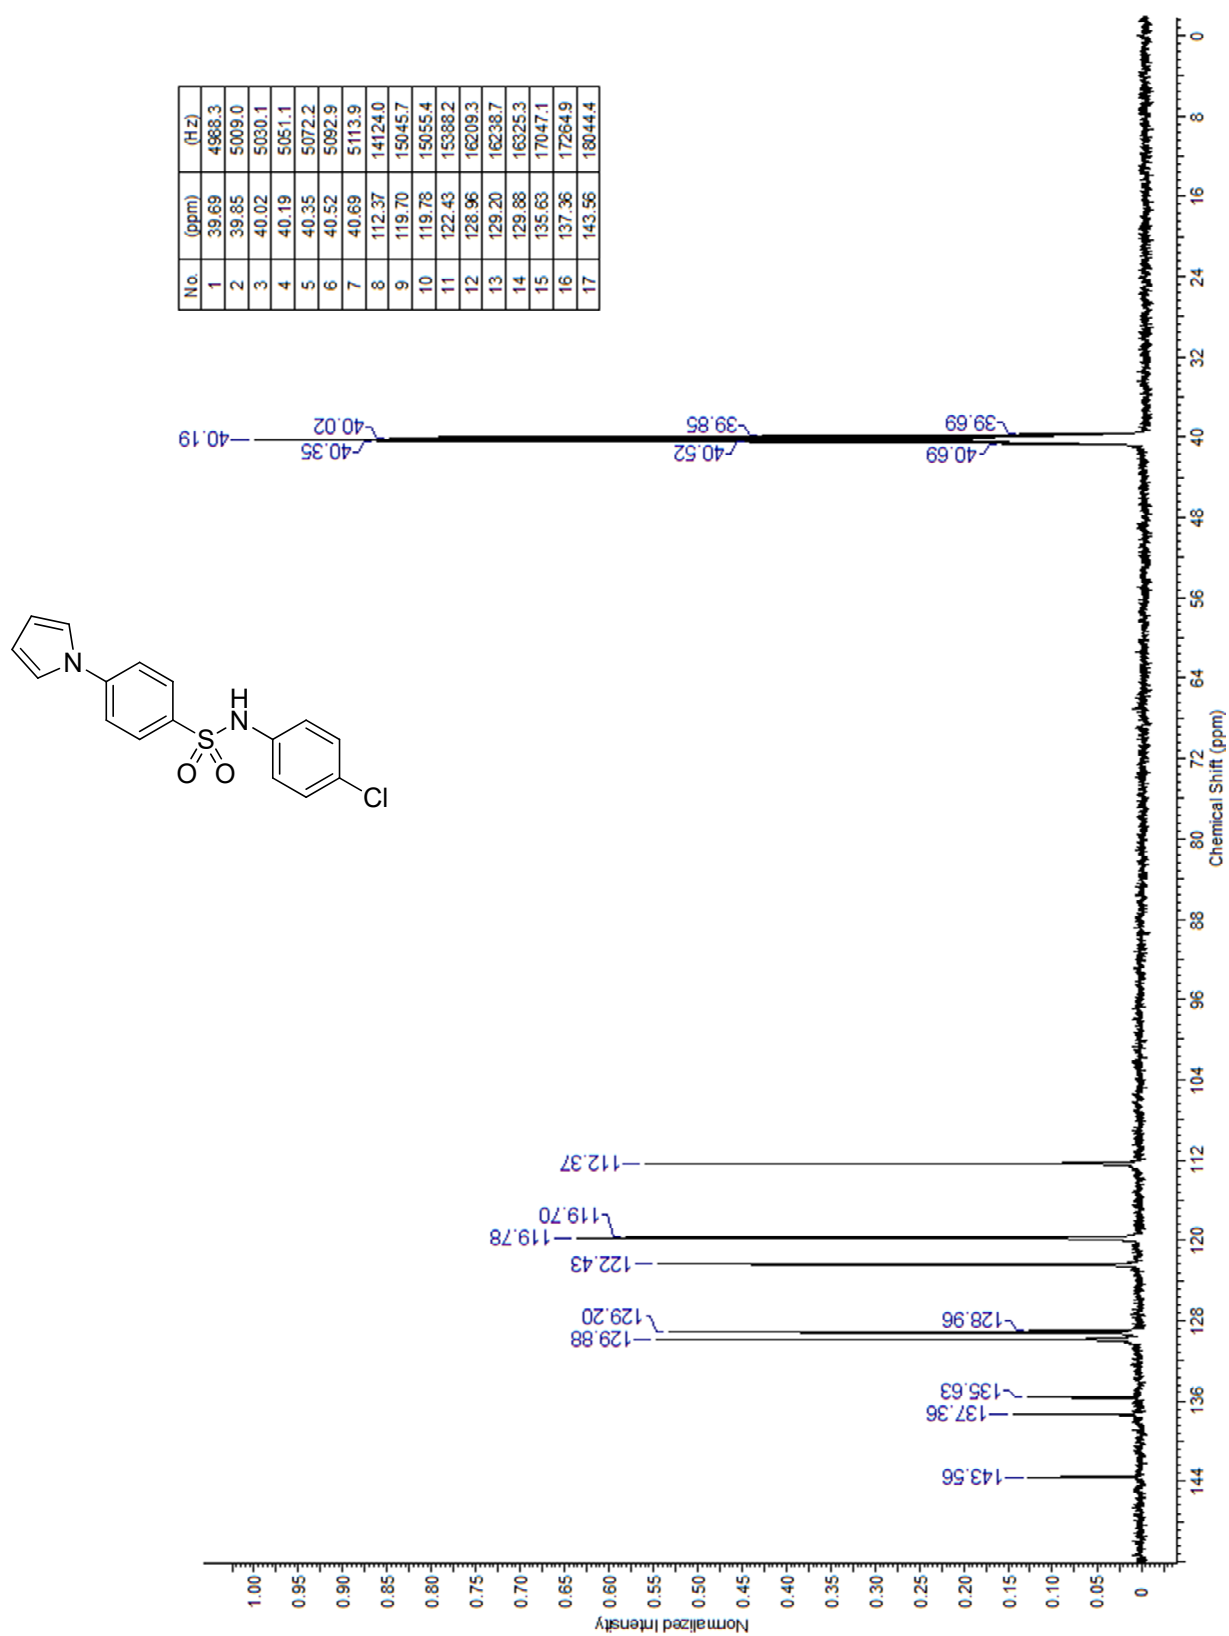

Spectrum S11.  $^{13}\text{C}$  NMR of compd **6** (125 MHz.  $\text{DMSO-}d_6$ ).

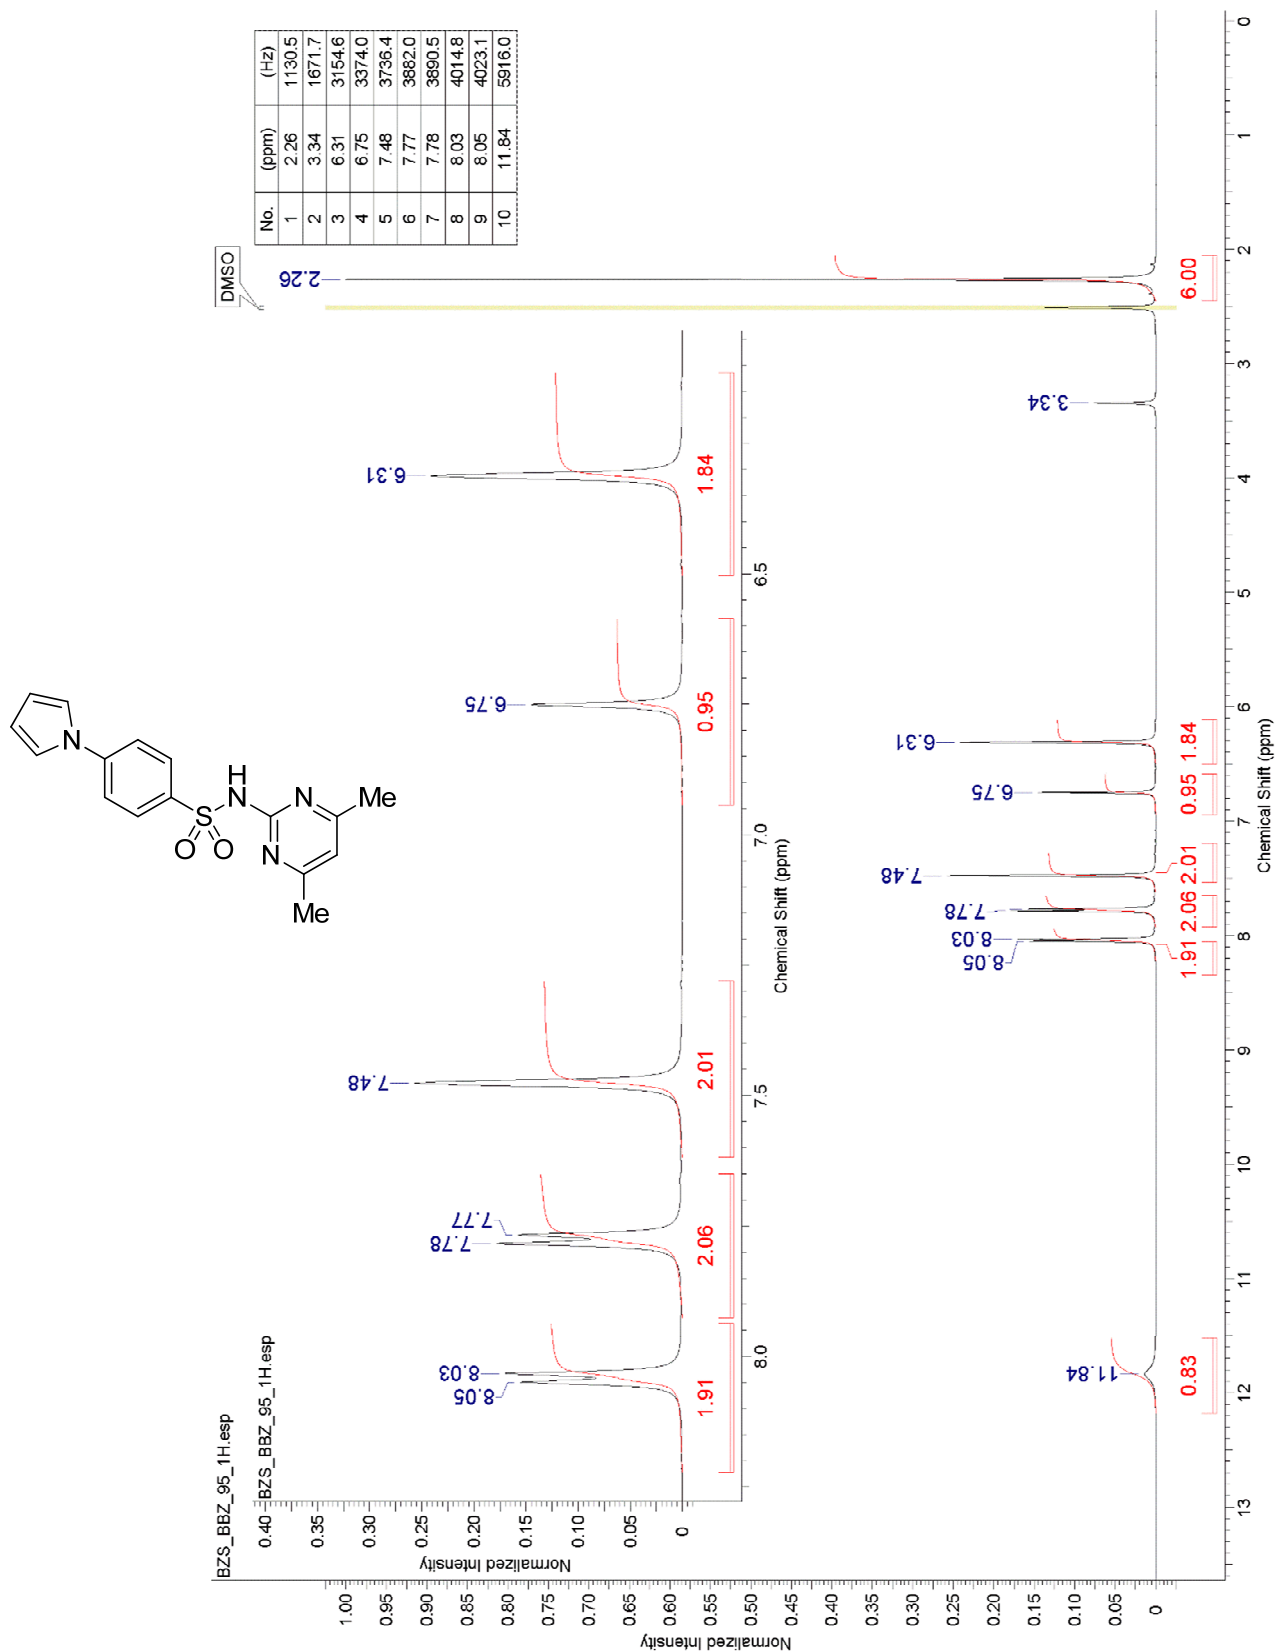

Spectrum S12.  $^1\text{H}$  NMR of compd 7 (500 MHz.  $\text{DMSO}-d_6$ ).

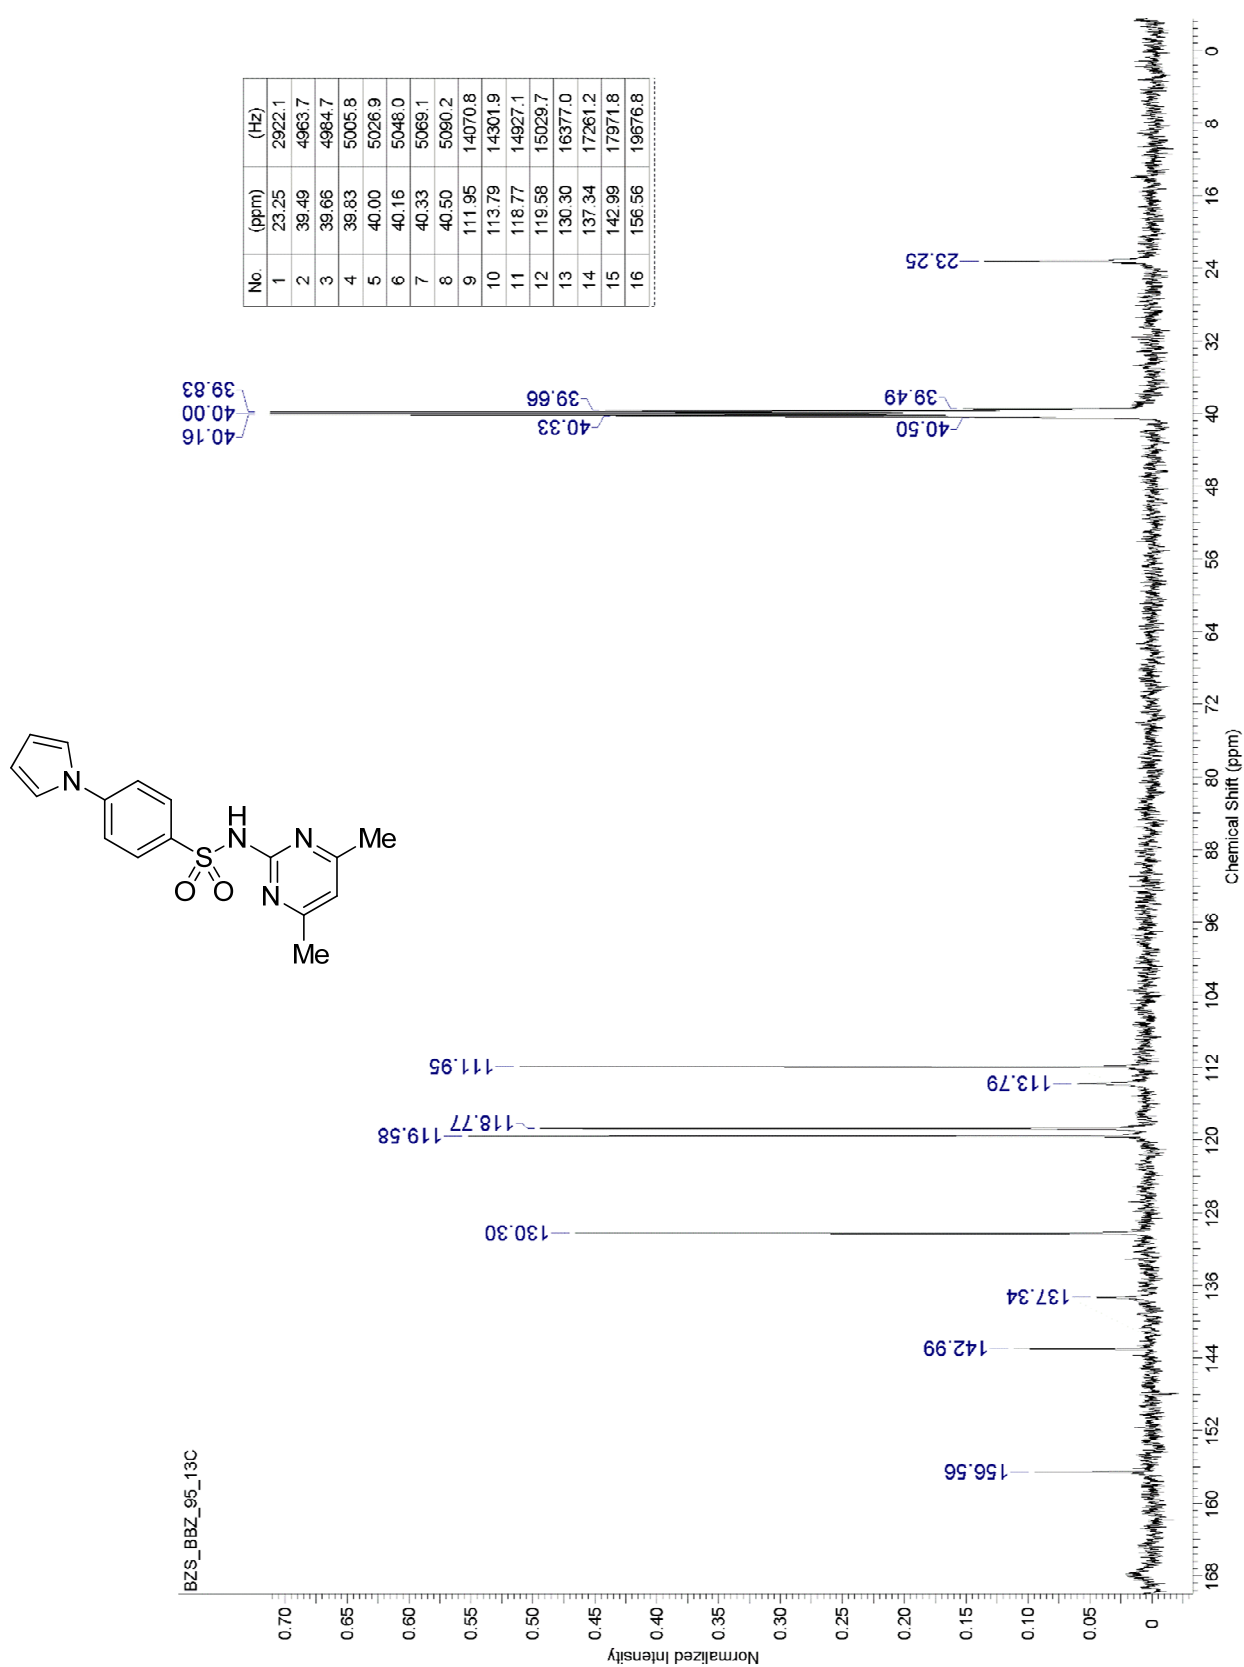

**Spectrum S13.** <sup>13</sup>C NMR of compd **7** (125 MHz, DMSO-*d*<sub>6</sub>).

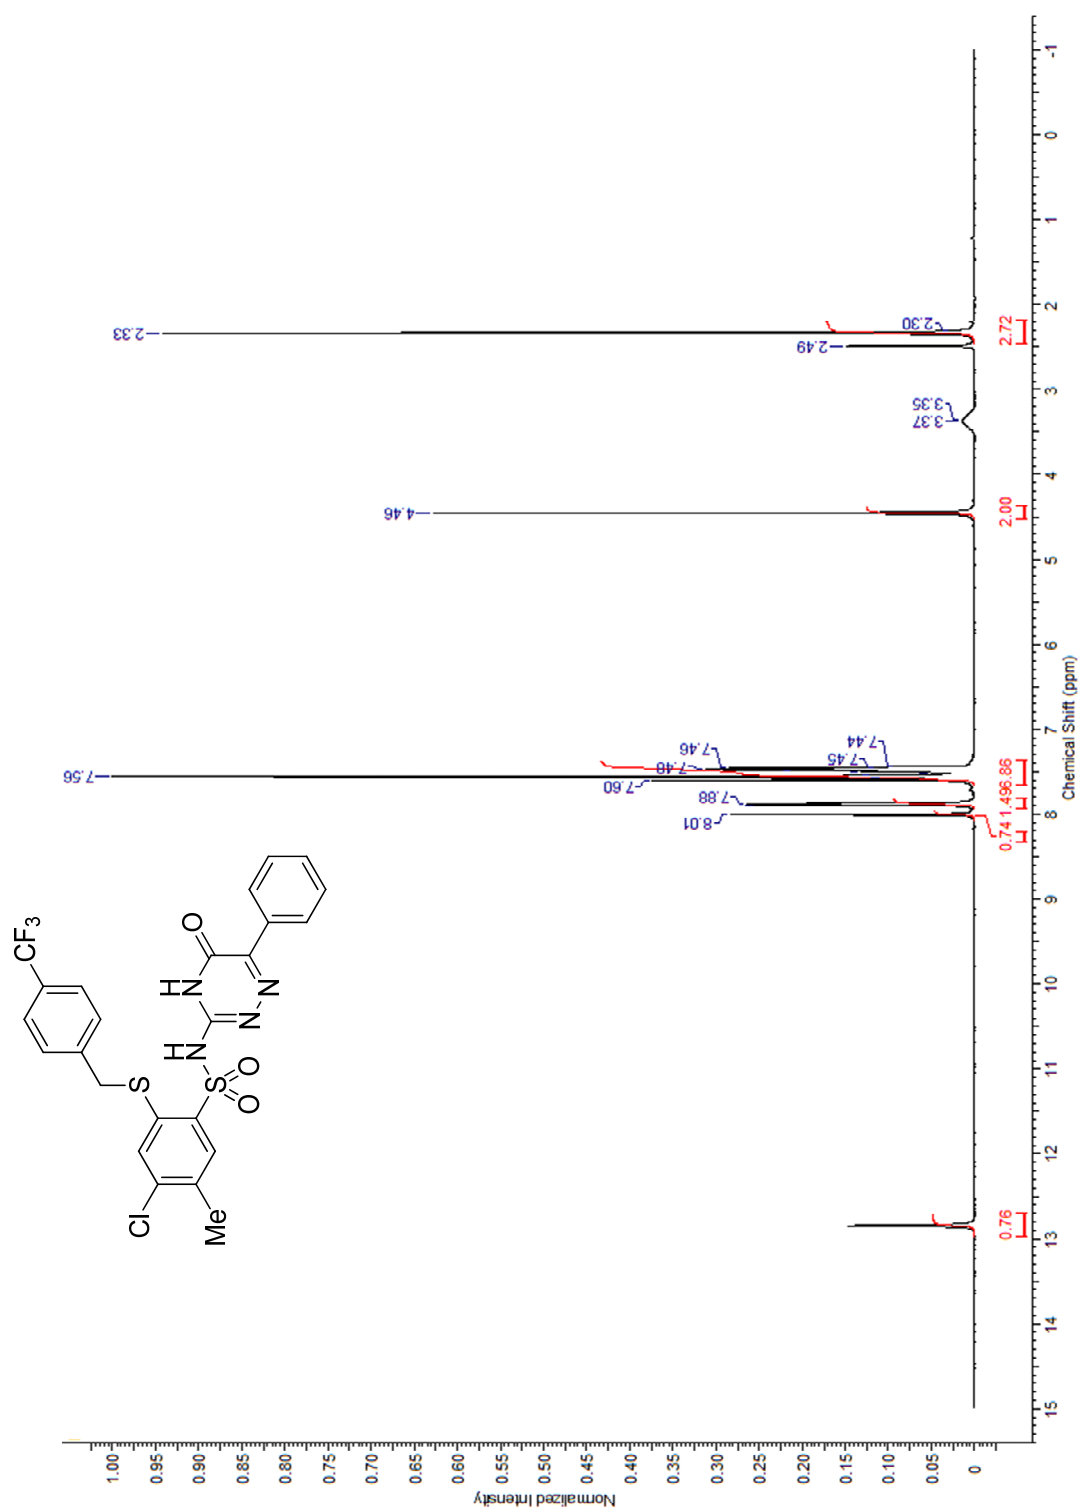

**Spectrum S14.**  $^1\text{H}$  NMR of compd **8** (500 MHz,  $\text{DMSO}-d_6$ ).

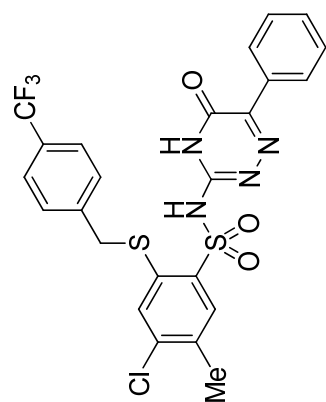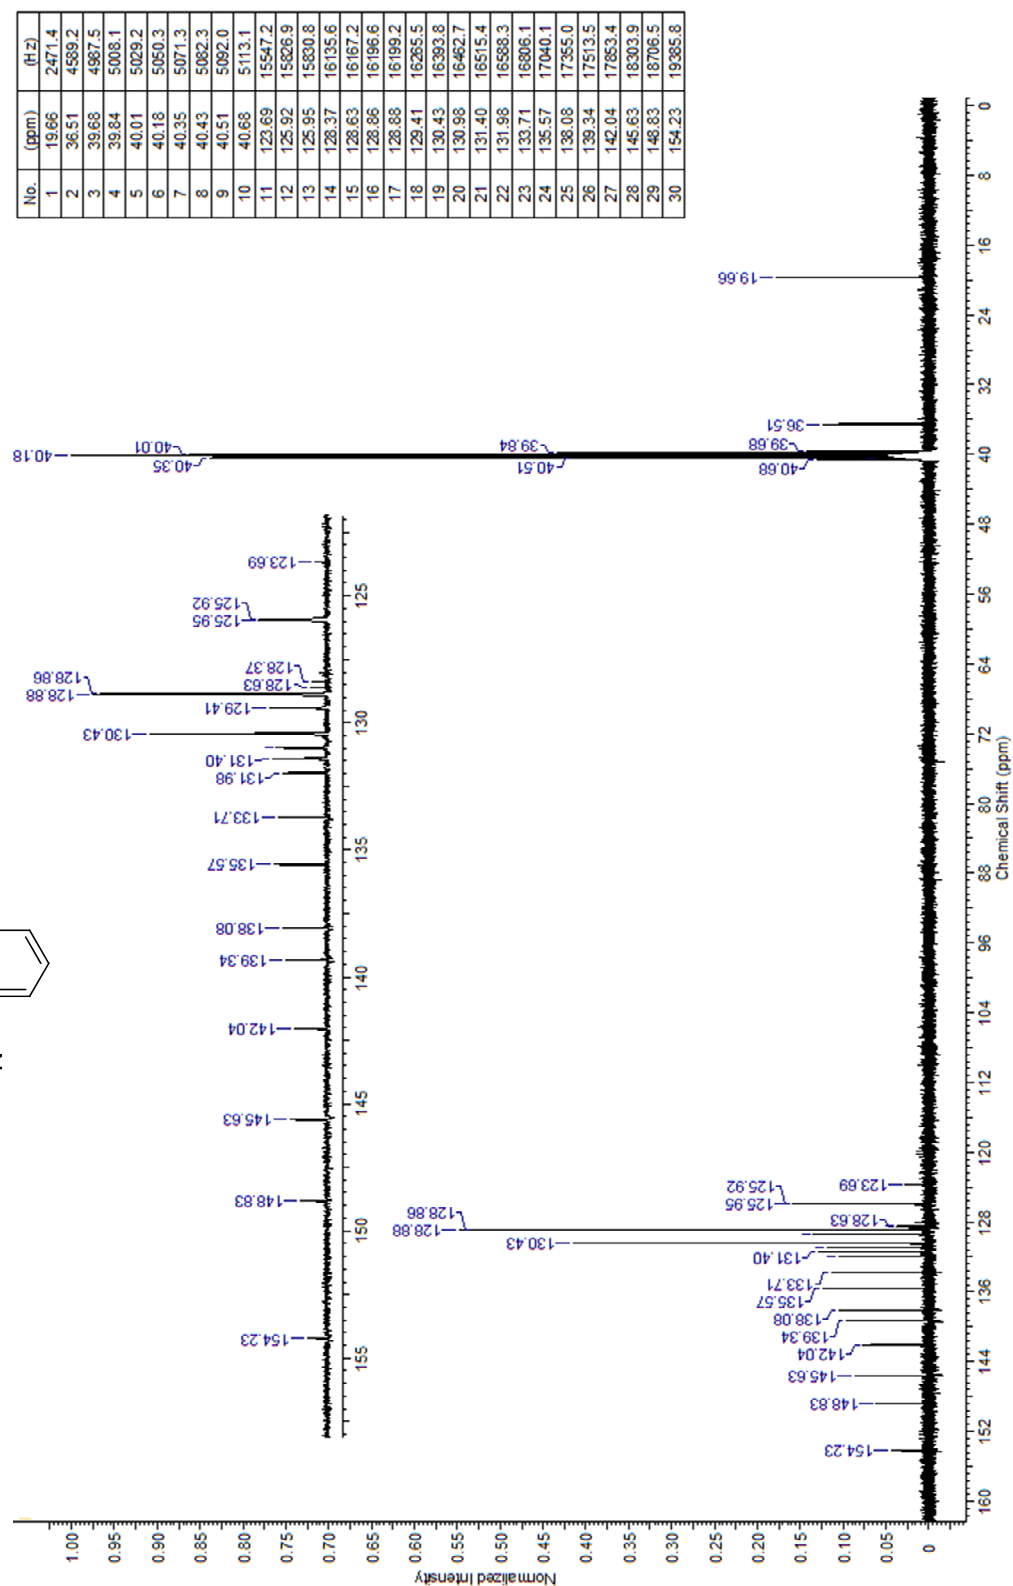

**Spectrum S15.**  $^{13}\text{C}$  NMR of compd **8** (125 MHz.  $\text{DMSO}-d_6$ ).



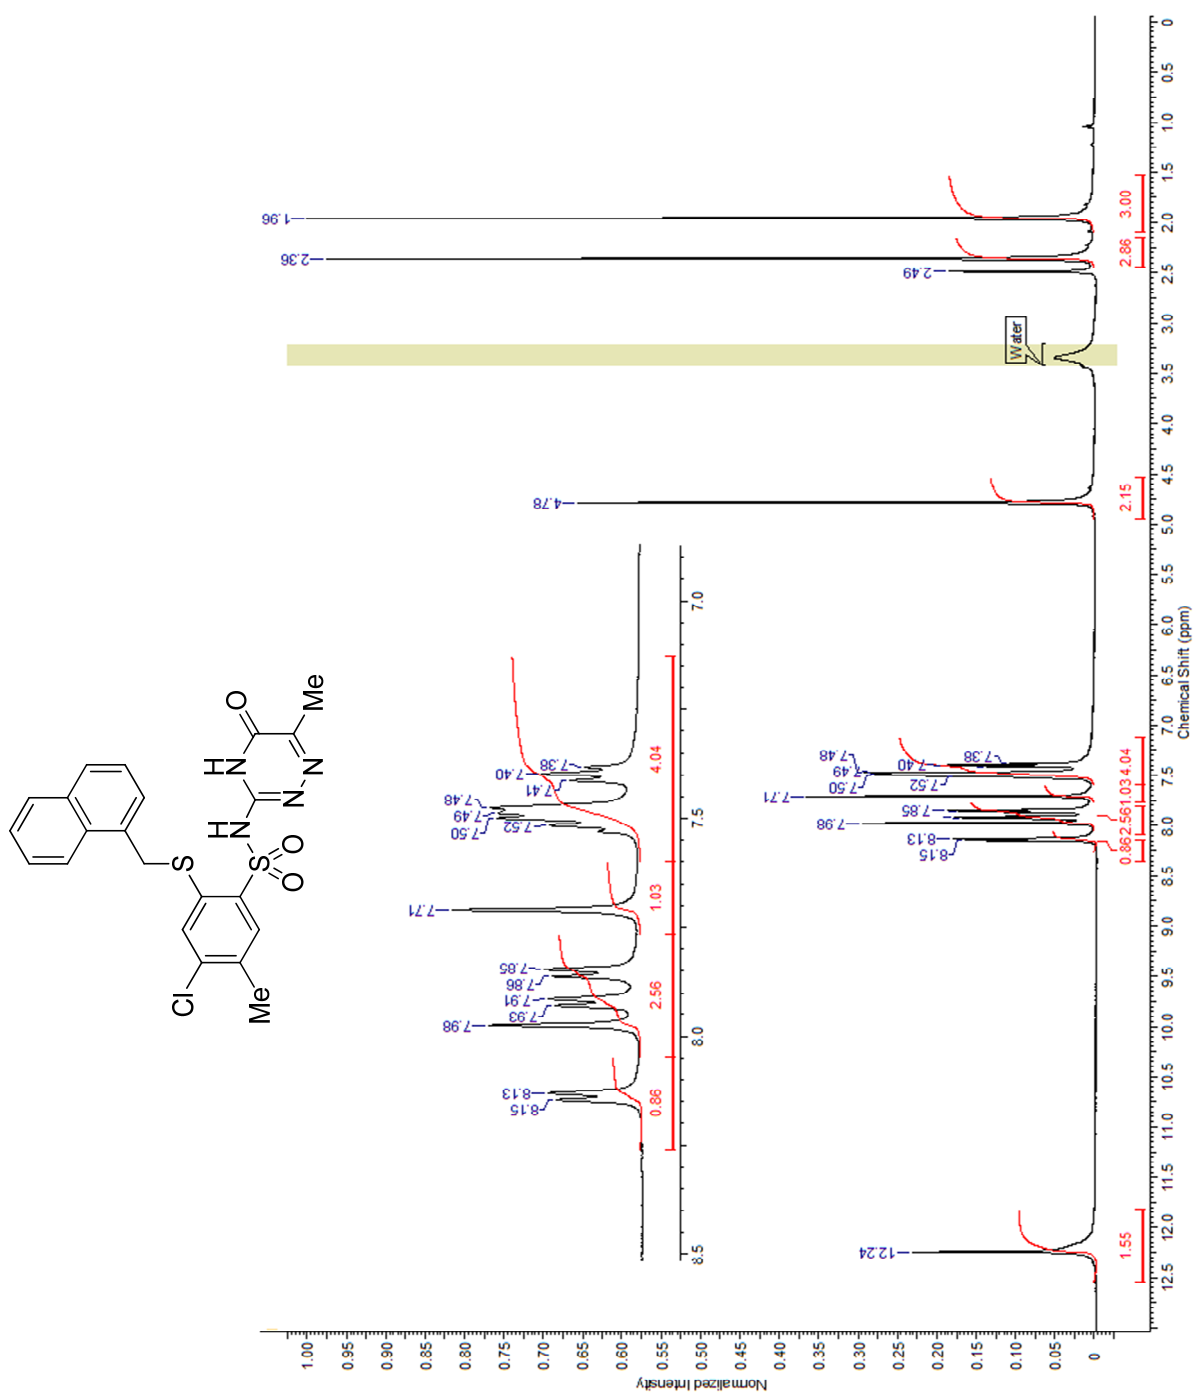

**Spectrum S16.** <sup>1</sup>H NMR of compd **9** (500 MHz, DMSO-*d*<sub>6</sub>).

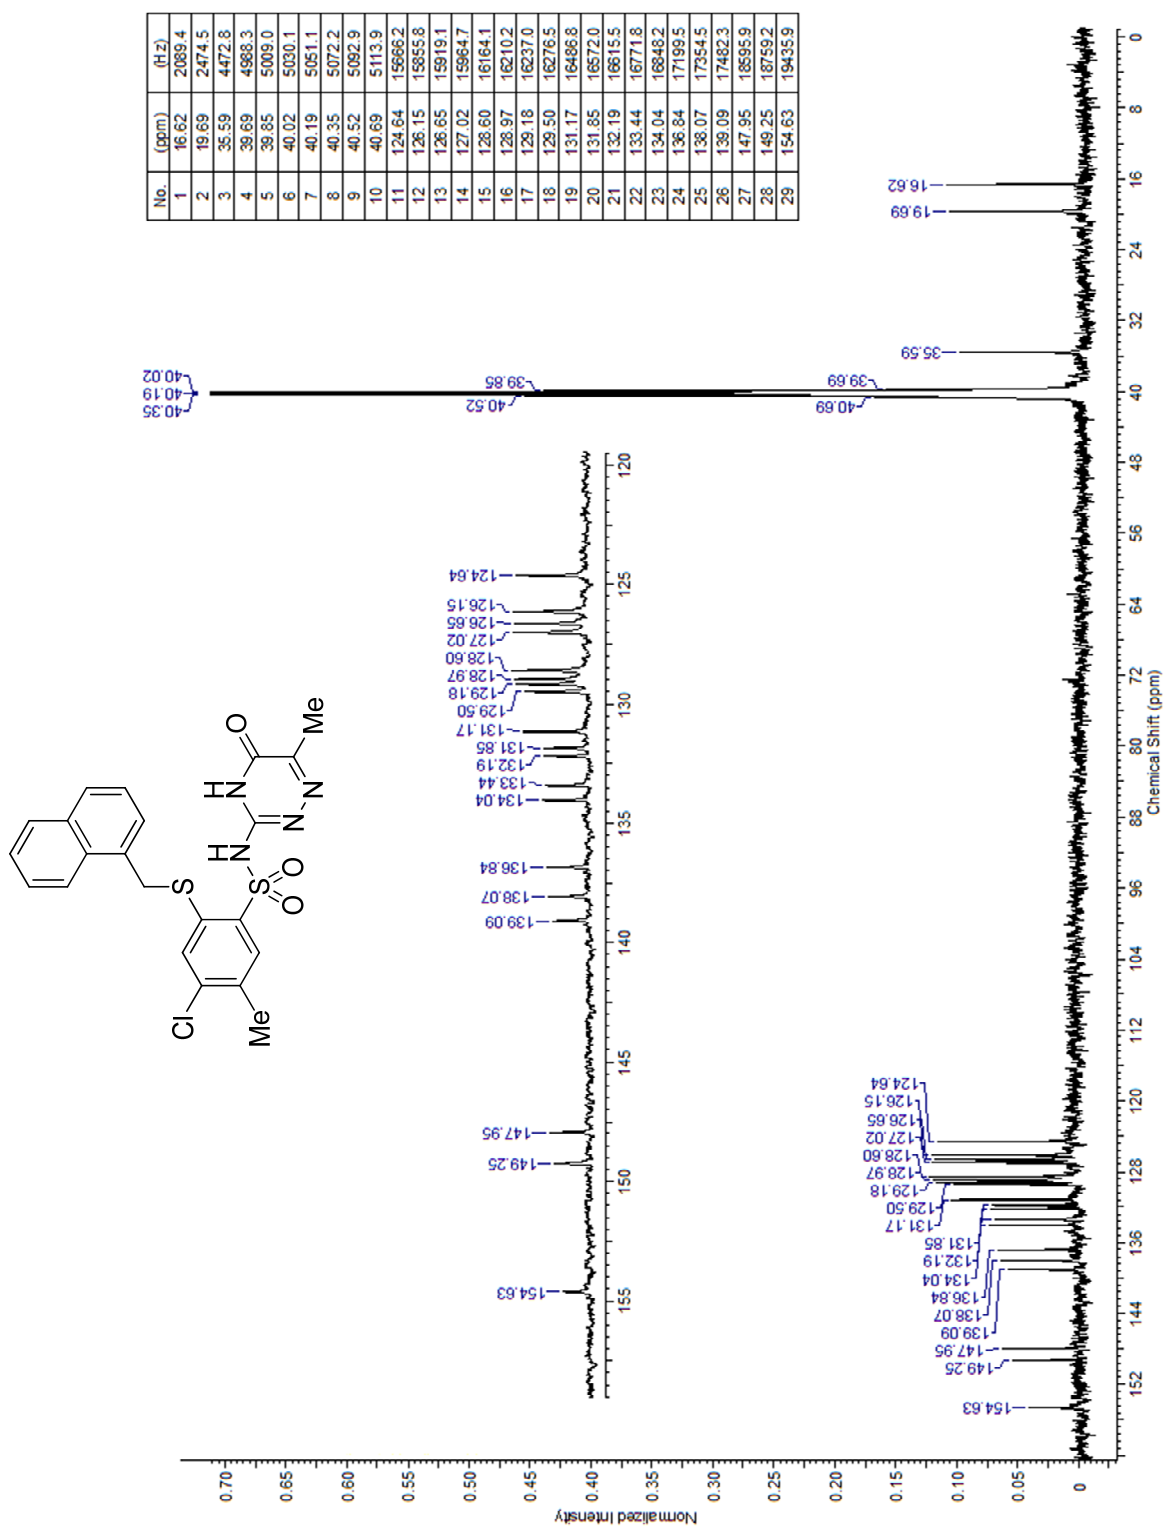

**Spectrum S17.**  $^{13}\text{C}$  NMR of compd **9** (125 MHz.  $\text{DMSO-}d_6$ ).

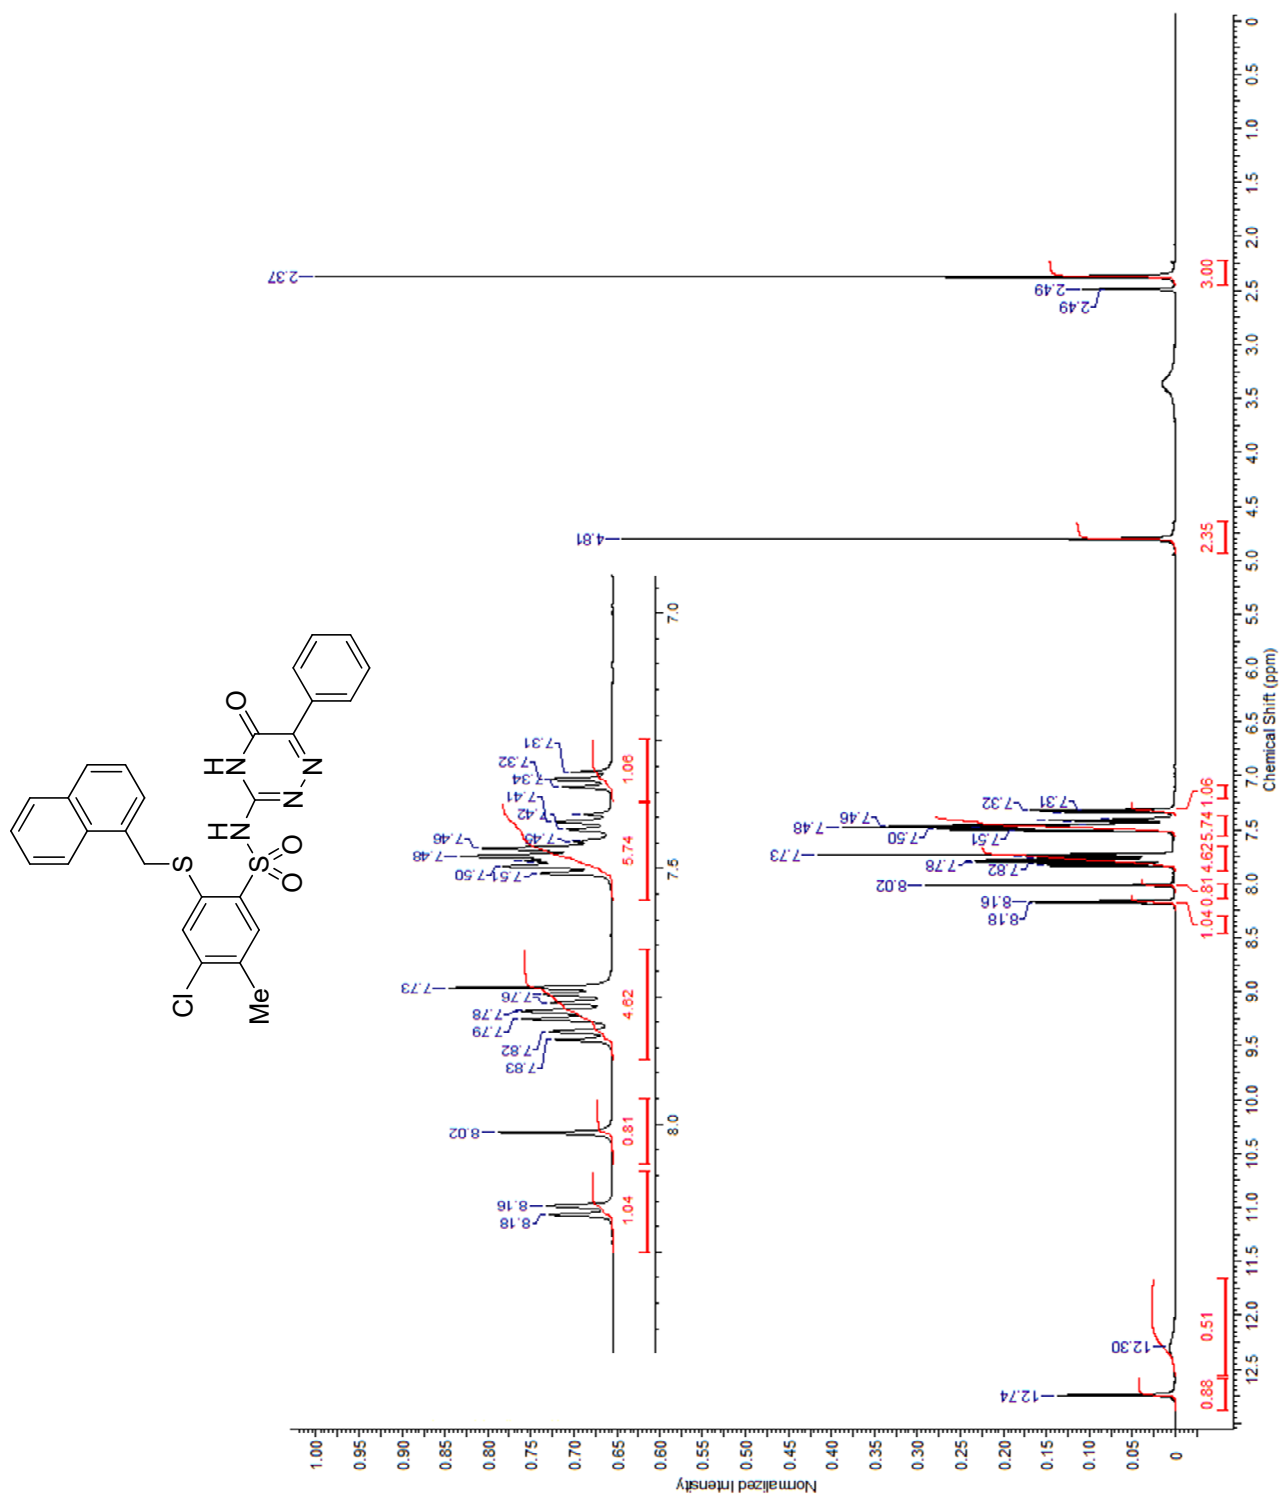

**Spectrum S18.**  $^1\text{H}$  NMR of compd **10** (500 MHz,  $\text{DMSO}-d_6$ ).

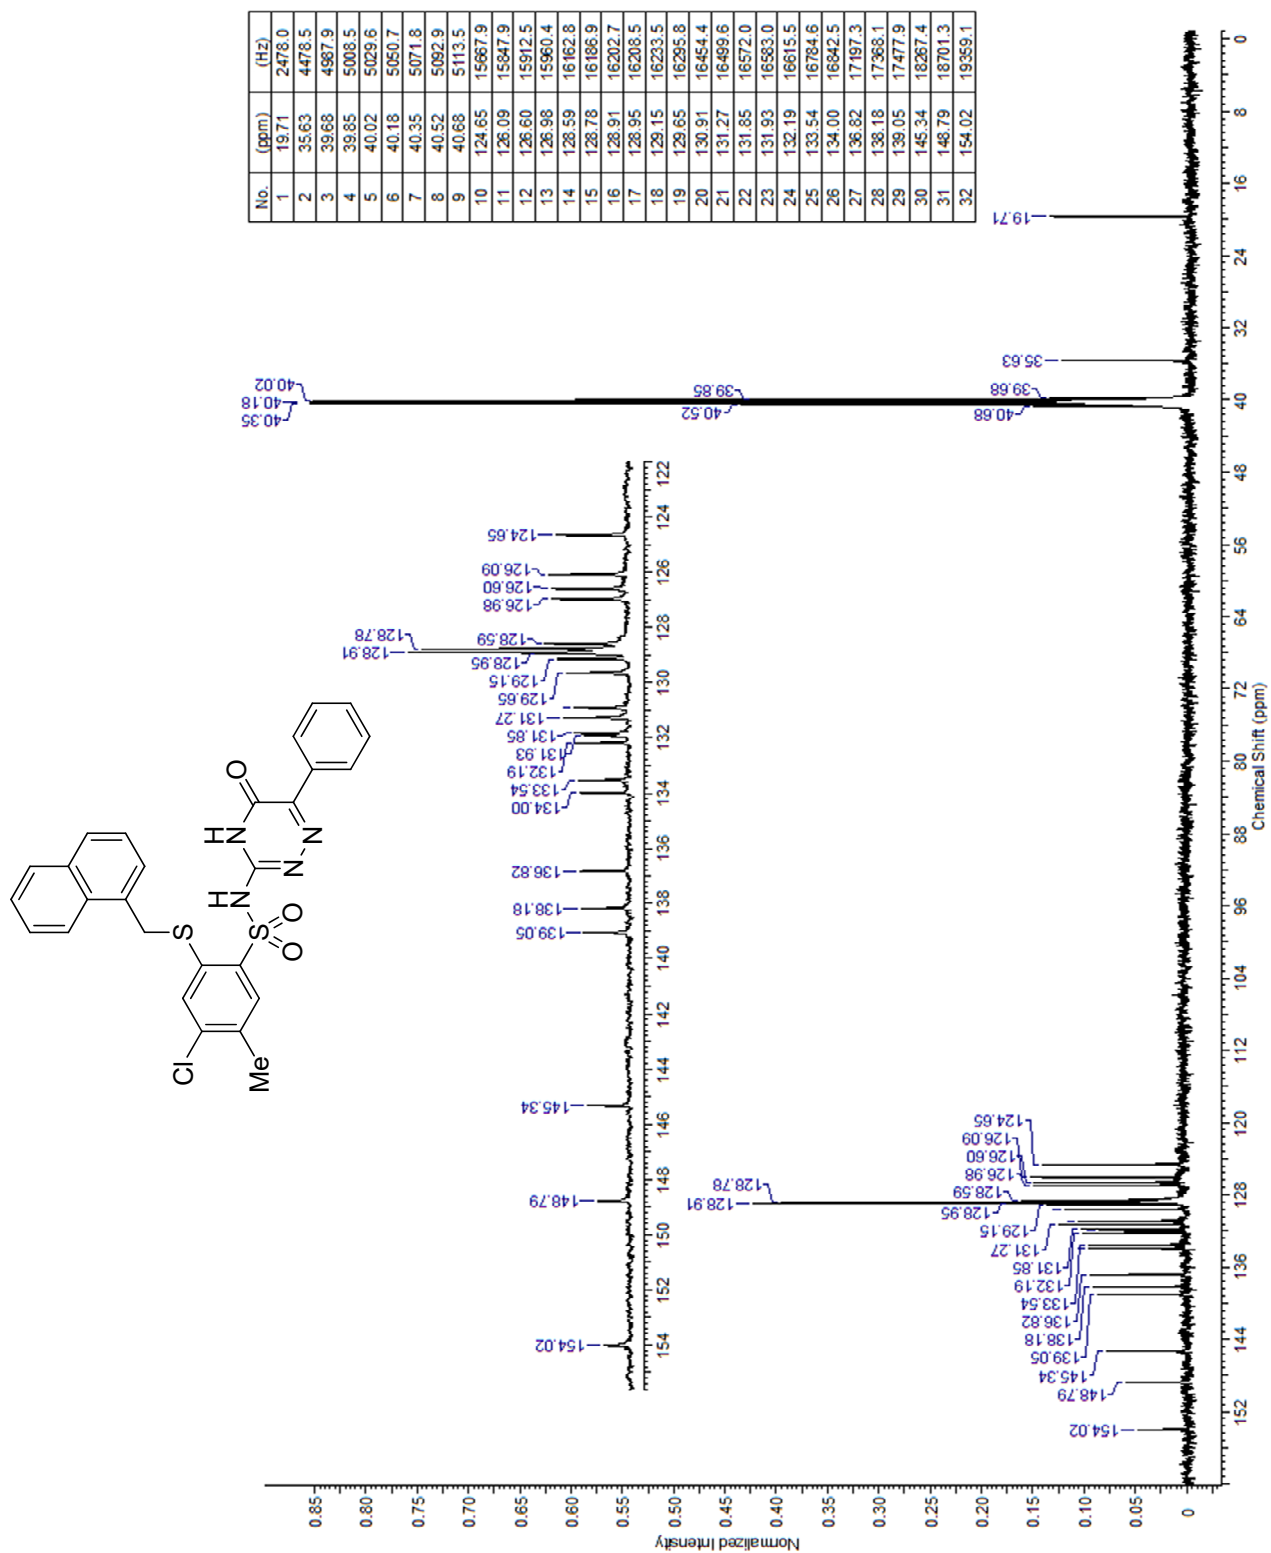

**Spectrum S19.** <sup>13</sup>C NMR of compd **10** (125 MHz, DMSO-*d*<sub>6</sub>).

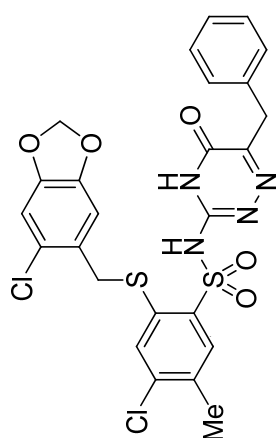

| INDEX | FREQUENCY | PPM    | HEIGHT |
|-------|-----------|--------|--------|
| 1     | 6213.064  | 12.430 | 10.1   |
| 2     | 3989.814  | 7.982  | 15.2   |
| 3     | 3804.744  | 7.512  | 18.1   |
| 4     | 3661.669  | 7.326  | 6.2    |
| 5     | 3654.344  | 7.311  | 14.2   |
| 6     | 3647.020  | 7.296  | 12.5   |
| 7     | 3629.929  | 7.262  | 20.8   |
| 8     | 3622.604  | 7.248  | 13.5   |
| 9     | 3611.861  | 7.226  | 2.4    |
| 10    | 3496.131  | 6.995  | 19.9   |
| 11    | 3482.947  | 6.968  | 13.2   |
| 12    | 3026.376  | 6.055  | 45.3   |
| 13    | 2139.603  | 4.281  | 36.2   |
| 14    | 1927.188  | 3.856  | 36.9   |
| 15    | 1754.305  | 3.470  | 4.5    |
| 16    | 1727.469  | 3.456  | 11.5   |
| 17    | 1720.632  | 3.442  | 11.5   |
| 18    | 1713.308  | 3.428  | 4.9    |
| 19    | 1676.638  | 3.358  | 3.5    |
| 20    | 1256.249  | 2.513  | 30.5   |
| 21    | 1254.784  | 2.510  | 32.9   |
| 22    | 1176.584  | 2.360  | 53.1   |
| 23    | 536.920   | 1.078  | 11.4   |
| 24    | 532.083   | 1.065  | 19.9   |
| 25    | 524.759   | 1.050  | 9.4    |

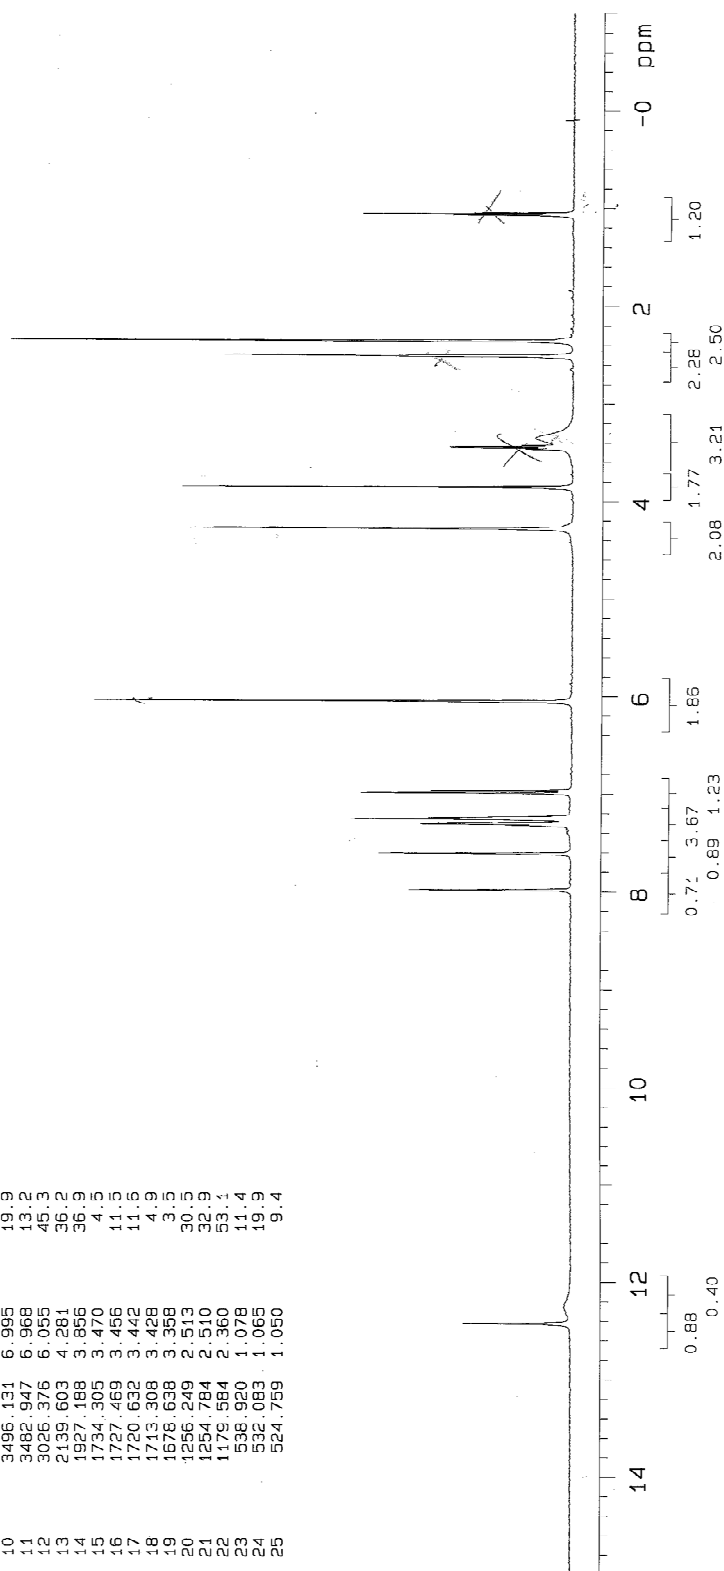

Spectrum S20.  $^1\text{H}$  NMR of compd **11** (200 MHz,  $\text{DMSO}-d_6$ ).

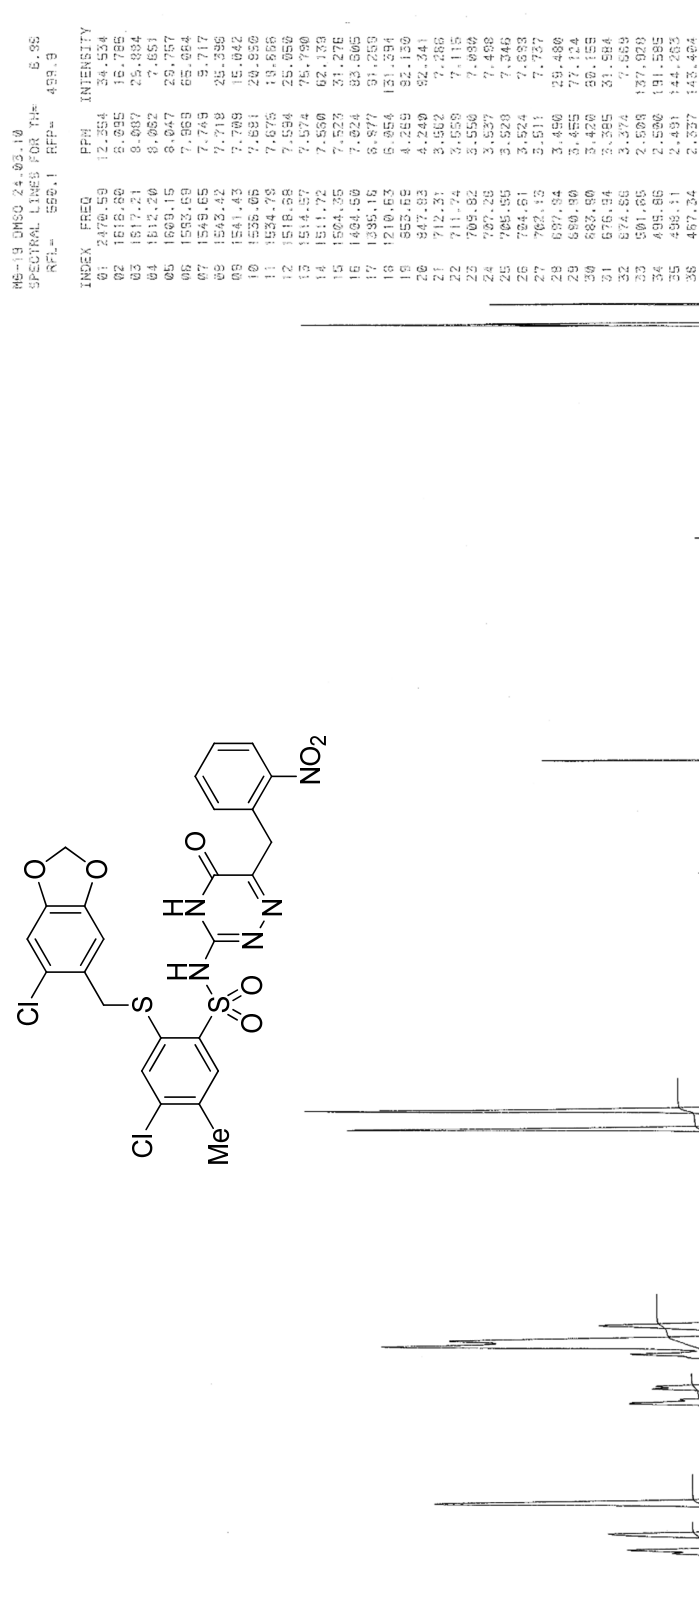

Spectrum S21. <sup>1</sup>H NMR of compd 12 (200 MHz. DMSO-*d*<sub>6</sub>).

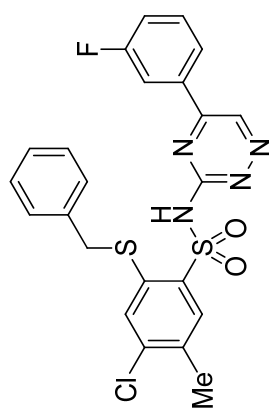

| No. | (ppm) | Hz     |
|-----|-------|--------|
| 1   | 2.29  | 459.3  |
| 2   | 4.31  | 862.3  |
| 3   | 7.09  | 1418.1 |
| 4   | 7.10  | 1420.1 |
| 5   | 7.26  | 1451.4 |
| 6   | 7.37  | 1474.5 |
| 7   | 7.50  | 1500.3 |
| 8   | 7.54  | 1507.9 |
| 9   | 7.58  | 1516.3 |
| 10  | 7.63  | 1526.7 |
| 11  | 7.67  | 1534.1 |
| 12  | 7.82  | 1563.8 |
| 13  | 7.85  | 1570.8 |
| 14  | 8.13  | 1625.0 |
| 15  | 9.31  | 1862.3 |
| 16  | 14.25 | 2850.5 |

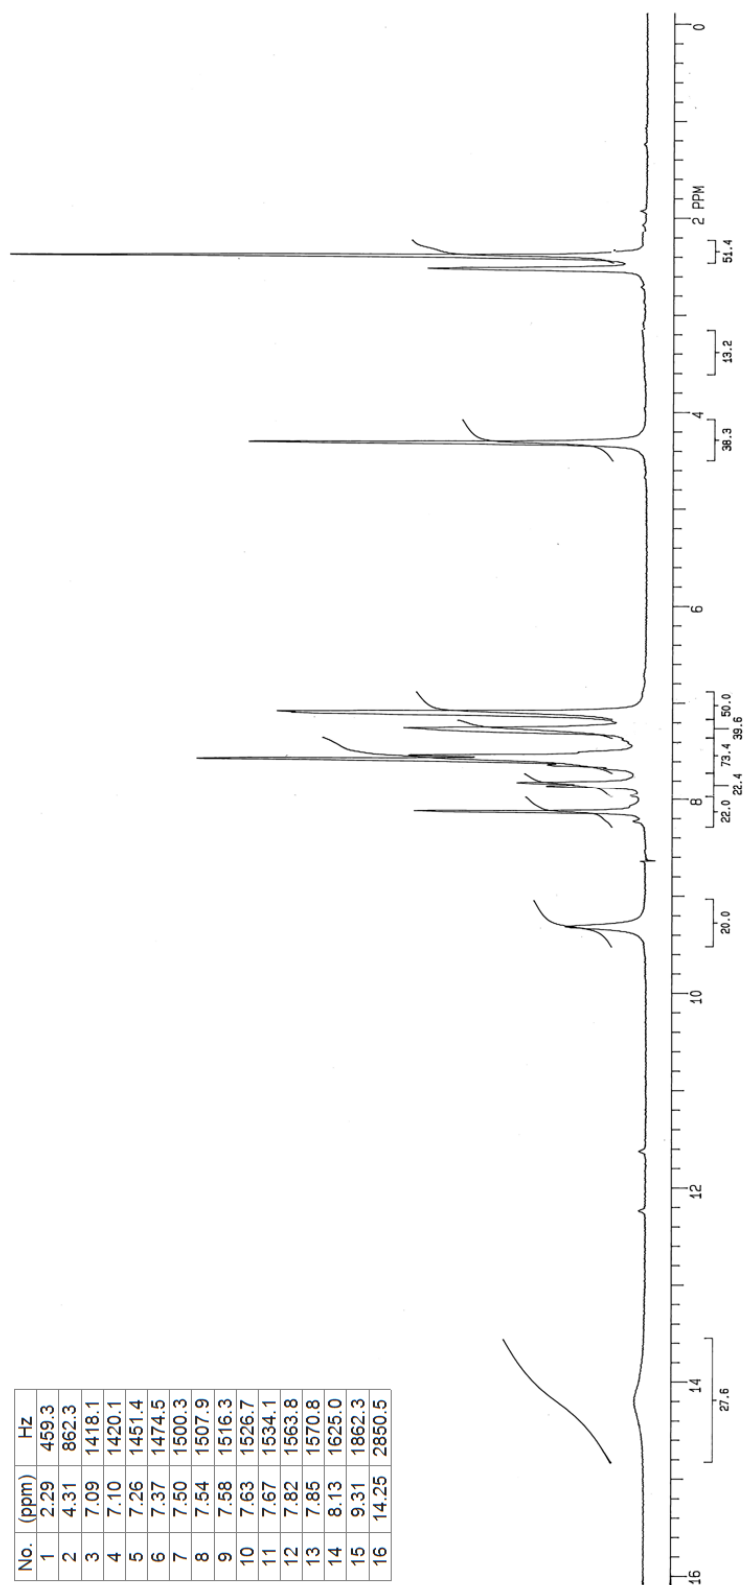

**Spectrum S22.**  $^1\text{H}$  NMR of compd **13** (200 MHz,  $\text{DMSO}-d_6$ ).

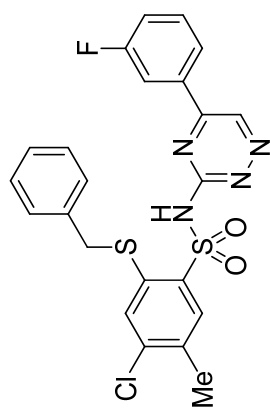

| No. | (ppm) | Hz     |
|-----|-------|--------|
| 1   | 19.1  | 960.5  |
| 2   | 36.2  | 1822.0 |
| 3   | 38.5  | 1938.4 |
| 4   | 38.9  | 1959.2 |
| 5   | 39.2  | 1972.0 |
| 6   | 39.4  | 1980.3 |
| 7   | 39.6  | 1993.1 |
| 8   | 39.8  | 2001.3 |
| 9   | 40.0  | 2013.4 |
| 10  | 40.2  | 2022.4 |
| 11  | 40.5  | 2035.7 |
| 12  | 40.6  | 2043.4 |
| 13  | 40.9  | 2056.4 |
| 14  | 41.0  | 2064.5 |
| 15  | 114.8 | 5774.6 |
| 16  | 115.3 | 5797.8 |
| 17  | 121.1 | 6090.1 |
| 18  | 125.1 | 6291.4 |
| 19  | 127.3 | 6401.0 |
| 20  | 128.3 | 6451.7 |
| 21  | 128.4 | 6459.1 |
| 22  | 129.1 | 6495.1 |
| 23  | 131.6 | 6616.5 |
| 24  | 131.7 | 6624.6 |
| 25  | 132.5 | 6661.1 |
| 26  | 132.7 | 6675.1 |
| 27  | 134.9 | 6784.2 |
| 28  | 135.1 | 6792.1 |
| 29  | 135.4 | 6807.6 |
| 30  | 136.5 | 6864.9 |
| 31  | 137.6 | 6919.5 |
| 32  | 160.1 | 8053.0 |
| 233 | 165.0 | 8298.3 |

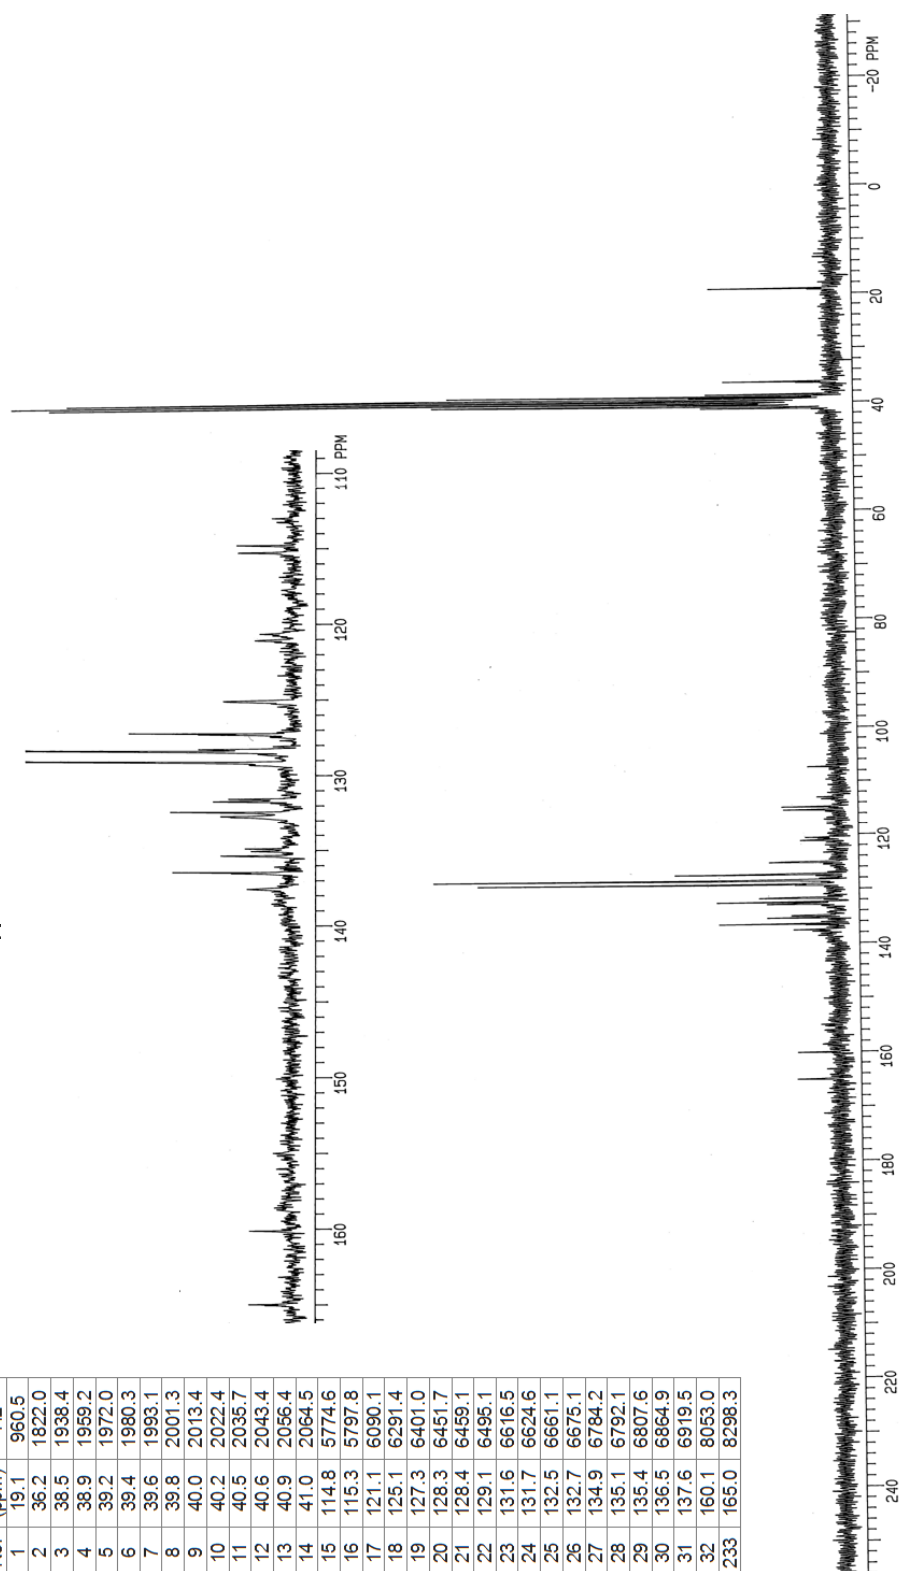

**Spectrum S23.**  $^{13}\text{C}$  NMR of compd **13** (50 MHz.  $\text{DMSO-}d_6$ ).



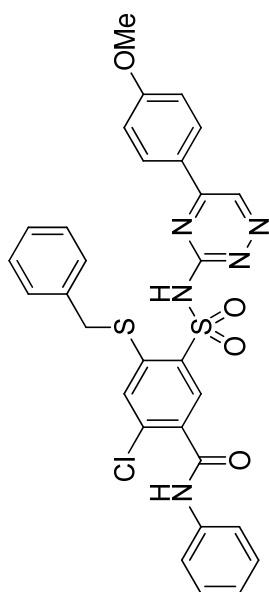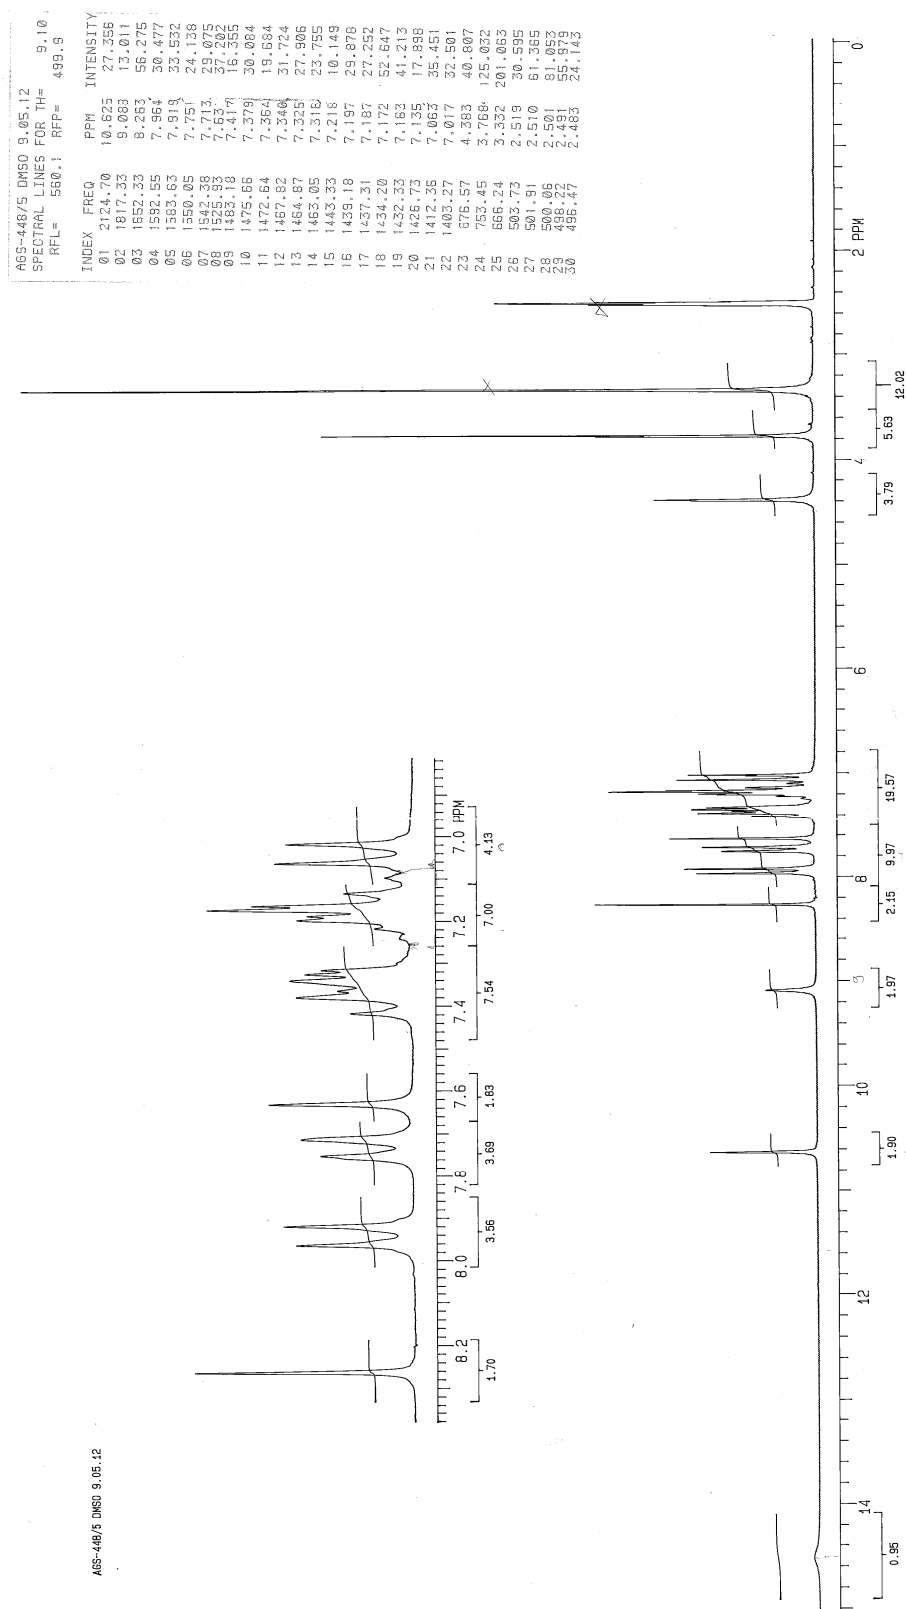

Spectrum S24.  $^1\text{H}$  NMR of compd **14** (200 MHz. DMSO- $d_6$ ).

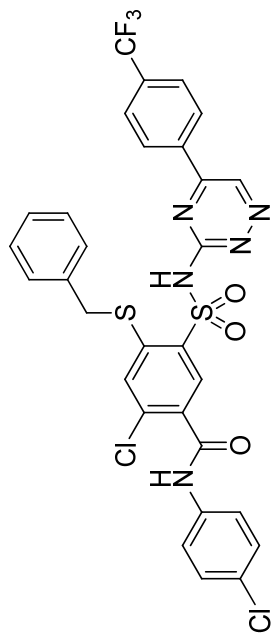

| No. | (ppm) | Hz     |
|-----|-------|--------|
| 1   | 4.43  | 886.5  |
| 2   | 7.16  | 1432.6 |
| 3   | 7.28  | 1455.0 |
| 4   | 7.34  | 1467.8 |
| 5   | 7.35  | 1470.1 |
| 6   | 7.42  | 1483.6 |
| 7   | 7.46  | 1492.2 |
| 8   | 7.73  | 1545.5 |
| 9   | 7.77  | 1553.4 |
| 10  | 7.85  | 1569.6 |
| 11  | 7.89  | 1577.2 |
| 12  | 8.09  | 1618.1 |
| 13  | 8.13  | 1625.5 |
| 14  | 8.30  | 1660.6 |
| 15  | 9.36  | 1871.0 |
| 16  | 10.80 | 2158.7 |

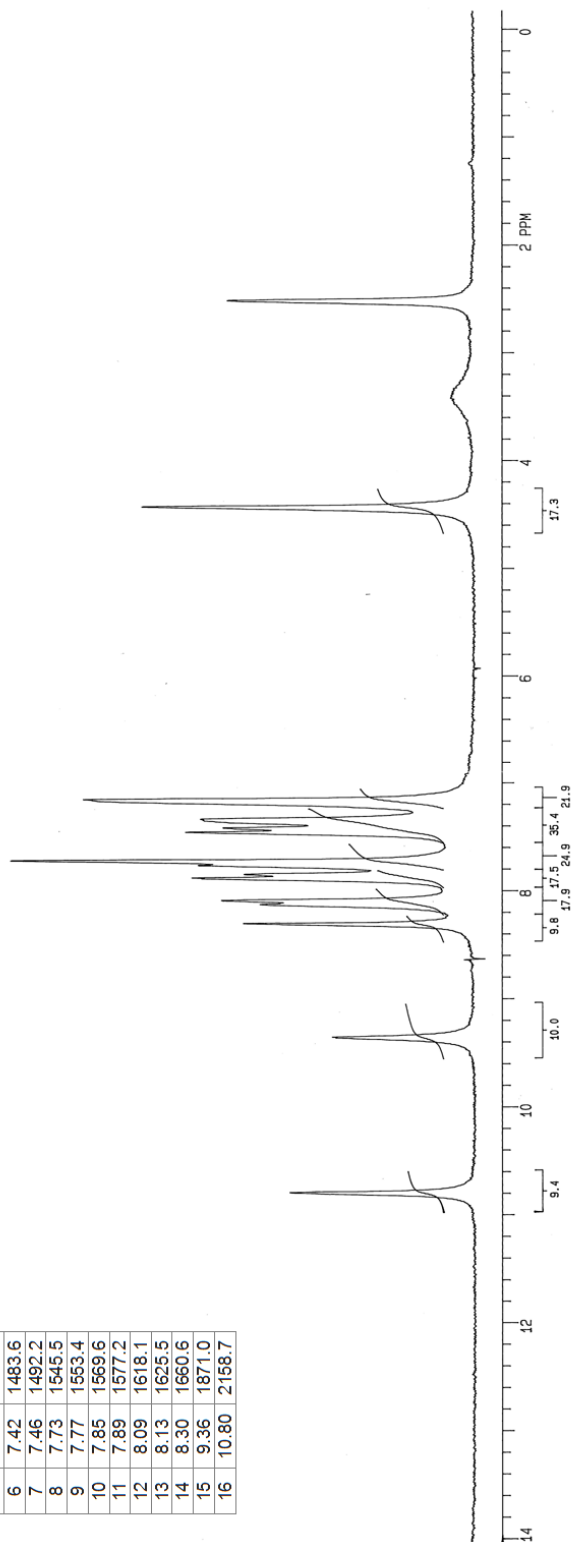

**Spectrum S25.**  $^1\text{H}$  NMR of compd **15** (200 MHz,  $\text{DMSO}-d_6$ ).

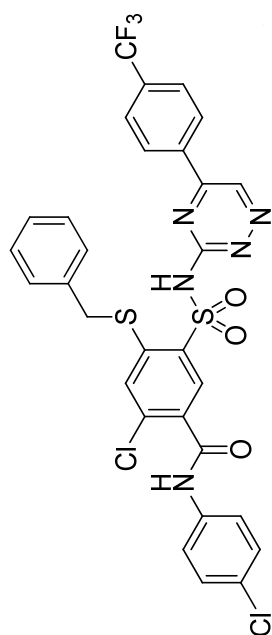

| No. | (ppm) | Hz     |
|-----|-------|--------|
| 1   | 35.9  | 1804.2 |
| 2   | 38.5  | 1938.4 |
| 3   | 38.9  | 1959.2 |
| 4   | 39.2  | 1972.0 |
| 5   | 39.4  | 1980.3 |
| 6   | 39.6  | 1993.1 |
| 7   | 39.8  | 2001.3 |
| 8   | 40.0  | 2013.4 |
| 9   | 40.2  | 2022.4 |
| 10  | 40.5  | 2035.7 |
| 11  | 40.6  | 2043.4 |
| 12  | 40.9  | 2056.4 |
| 13  | 41.0  | 2064.5 |
| 14  | 121.4 | 6103.7 |
| 15  | 126.3 | 6351.1 |
| 16  | 126.4 | 6354.2 |
| 17  | 126.6 | 6369.2 |
| 18  | 127.5 | 6412.4 |
| 19  | 128.0 | 6437.2 |
| 20  | 128.3 | 6450.9 |
| 21  | 128.6 | 6468.0 |
| 22  | 129.0 | 6489.1 |
| 23  | 129.2 | 6496.6 |
| 24  | 129.3 | 6503.7 |
| 25  | 129.6 | 6520.0 |
| 26  | 130.9 | 6583.3 |
| 27  | 132.2 | 6647.4 |
| 28  | 132.8 | 6678.4 |
| 29  | 133.4 | 6708.6 |
| 30  | 134.3 | 6755.3 |
| 31  | 136.2 | 6848.9 |
| 32  | 136.4 | 6857.9 |
| 33  | 137.9 | 6933.8 |
| 34  | 140.8 | 7080.7 |
| 35  | 155.1 | 7799.9 |
| 36  | 163.9 | 8243.0 |

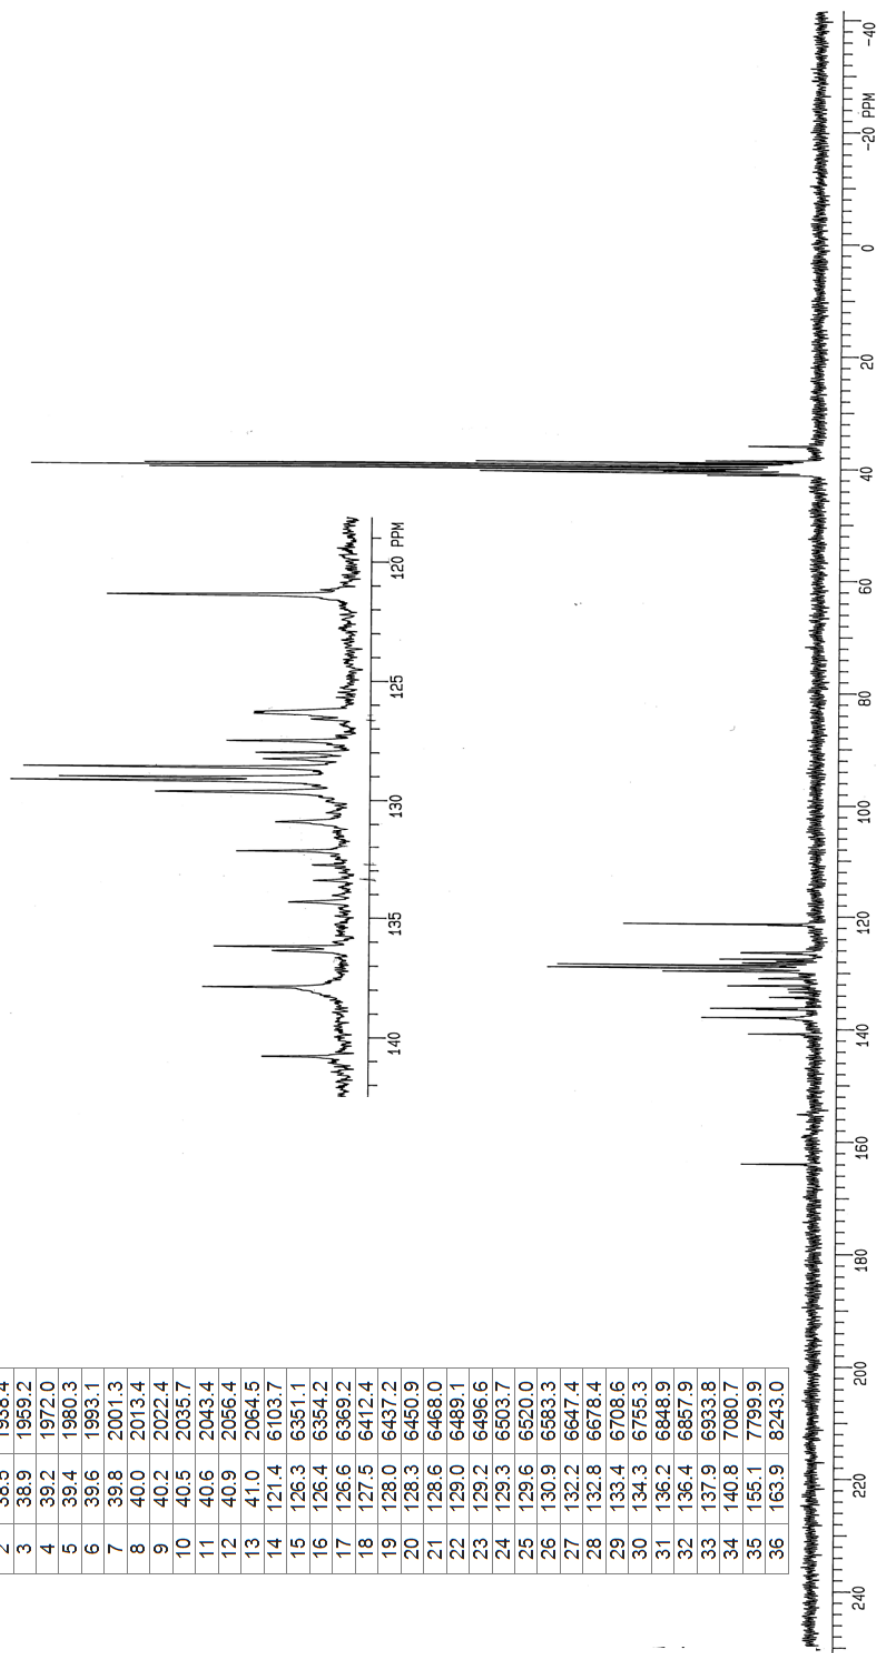

**Spectrum S26.**  $^{13}\text{C}$  NMR of compd **15** (50 MHz.  $\text{DMSO}-d_6$ ).

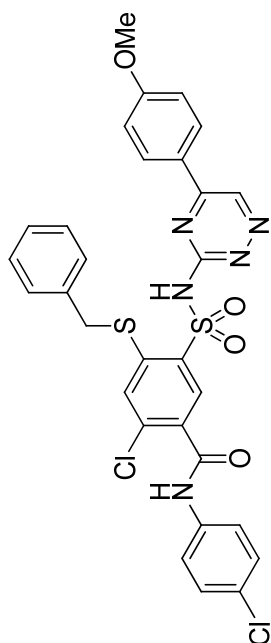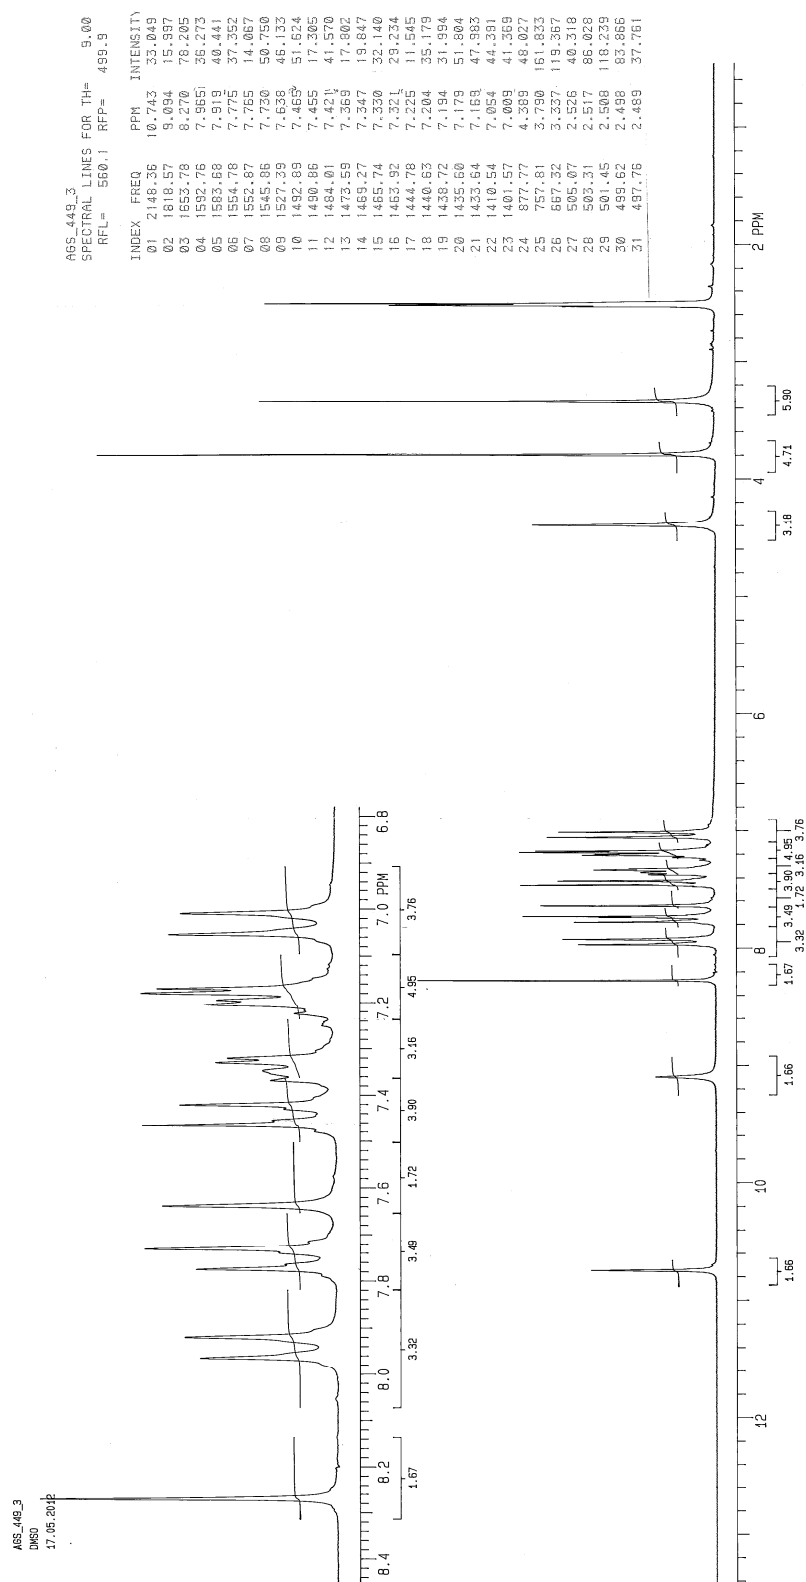

Spectrum S27.  $^1\text{H}$  NMR of compd 16 (200 MHz,  $\text{DMSO}-d_6$ ).

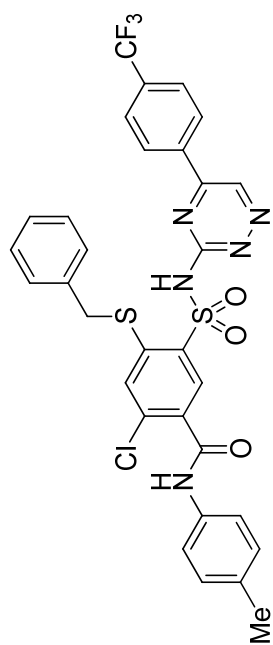

| No. | (ppm) | Hz     |
|-----|-------|--------|
| 1   | 2.31  | 461.0  |
| 2   | 4.43  | 885.9  |
| 3   | 7.16  | 1432.5 |
| 4   | 7.21  | 1440.9 |
| 5   | 7.34  | 1467.3 |
| 6   | 7.36  | 1470.8 |
| 7   | 7.60  | 1519.1 |
| 8   | 7.64  | 1527.1 |
| 9   | 7.72  | 1544.6 |
| 10  | 7.87  | 1573.8 |
| 11  | 7.91  | 1582.0 |
| 12  | 8.09  | 1617.0 |
| 13  | 8.13  | 1624.9 |
| 14  | 8.28  | 1656.1 |
| 15  | 9.36  | 1870.7 |
| 16  | 10.61 | 2120.7 |
| 17  | 14.13 | 2825.6 |

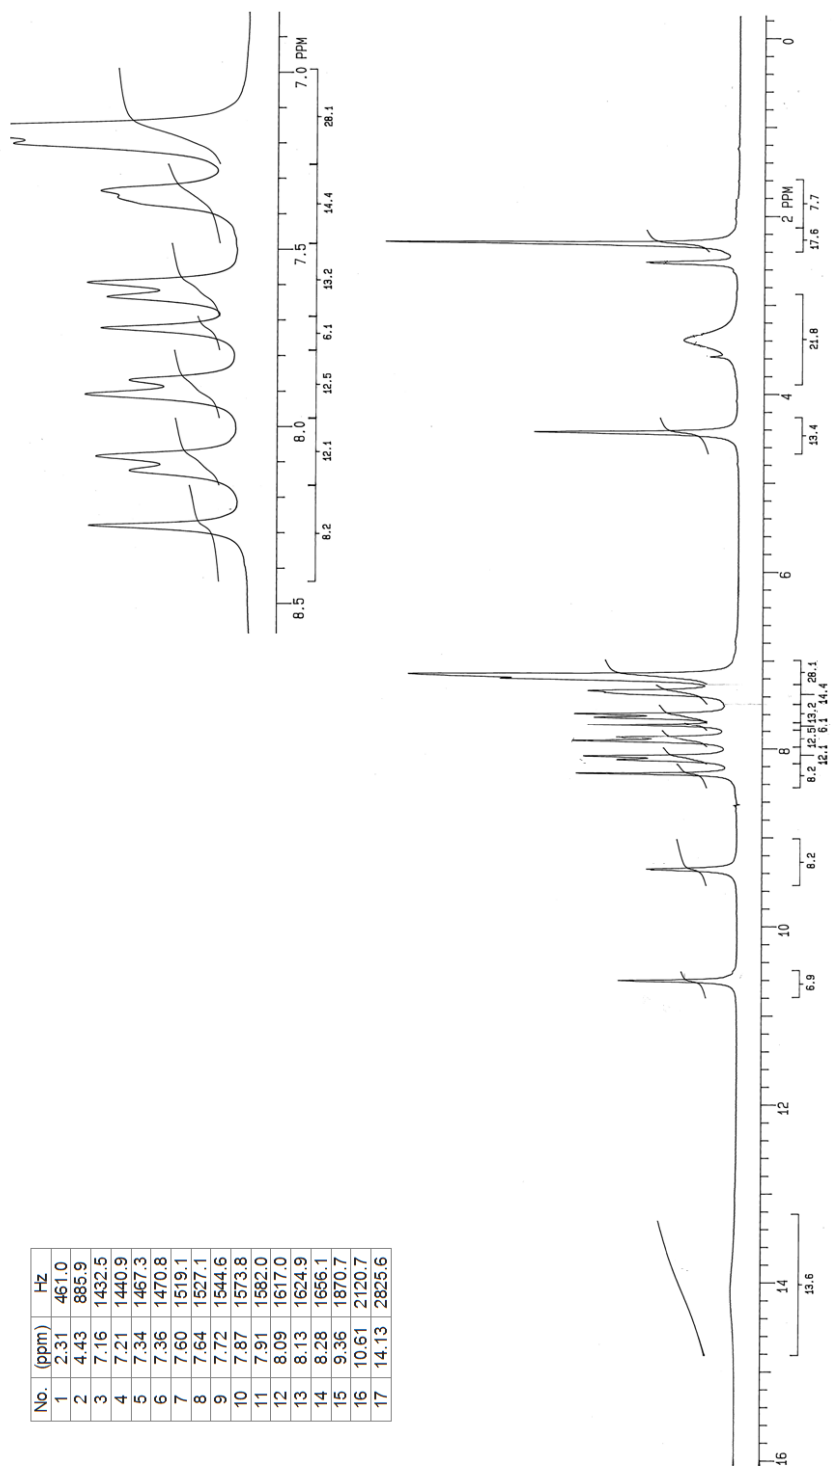

**Spectrum S28.**  $^1\text{H}$  NMR of compd **17** (200 MHz.  $\text{DMSO}-d_6$ ).

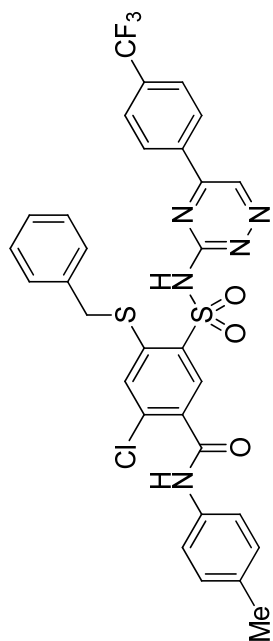

| No. | (ppm) | Hz     |
|-----|-------|--------|
| 1   | 20.8  | 1045.0 |
| 2   | 35.9  | 1805.9 |
| 3   | 38.5  | 1938.4 |
| 4   | 38.9  | 1959.2 |
| 5   | 39.2  | 1972.0 |
| 6   | 39.4  | 1980.3 |
| 7   | 39.6  | 1993.1 |
| 8   | 39.8  | 2001.3 |
| 9   | 40.0  | 2013.4 |
| 10  | 40.2  | 2022.4 |
| 11  | 40.5  | 2035.7 |
| 12  | 40.6  | 2043.4 |
| 13  | 40.9  | 2056.4 |
| 14  | 41.0  | 2064.5 |
| 15  | 119.8 | 6026.3 |
| 16  | 126.3 | 6352.9 |
| 17  | 126.4 | 6356.4 |
| 18  | 127.5 | 6411.3 |
| 19  | 128.3 | 6452.7 |
| 20  | 128.5 | 6459.9 |
| 21  | 128.6 | 6467.1 |
| 22  | 129.2 | 6496.5 |
| 23  | 129.5 | 6510.6 |
| 24  | 129.6 | 6519.5 |
| 25  | 130.9 | 6584.3 |
| 26  | 132.6 | 6667.3 |
| 27  | 133.4 | 6708.1 |
| 28  | 134.4 | 6757.7 |
| 29  | 136.2 | 6849.8 |
| 30  | 136.4 | 6858.6 |
| 31  | 136.5 | 6862.9 |
| 32  | 136.9 | 6884.6 |
| 33  | 140.5 | 7065.3 |
| 34  | 155.0 | 7794.9 |
| 35  | 163.6 | 8229.1 |

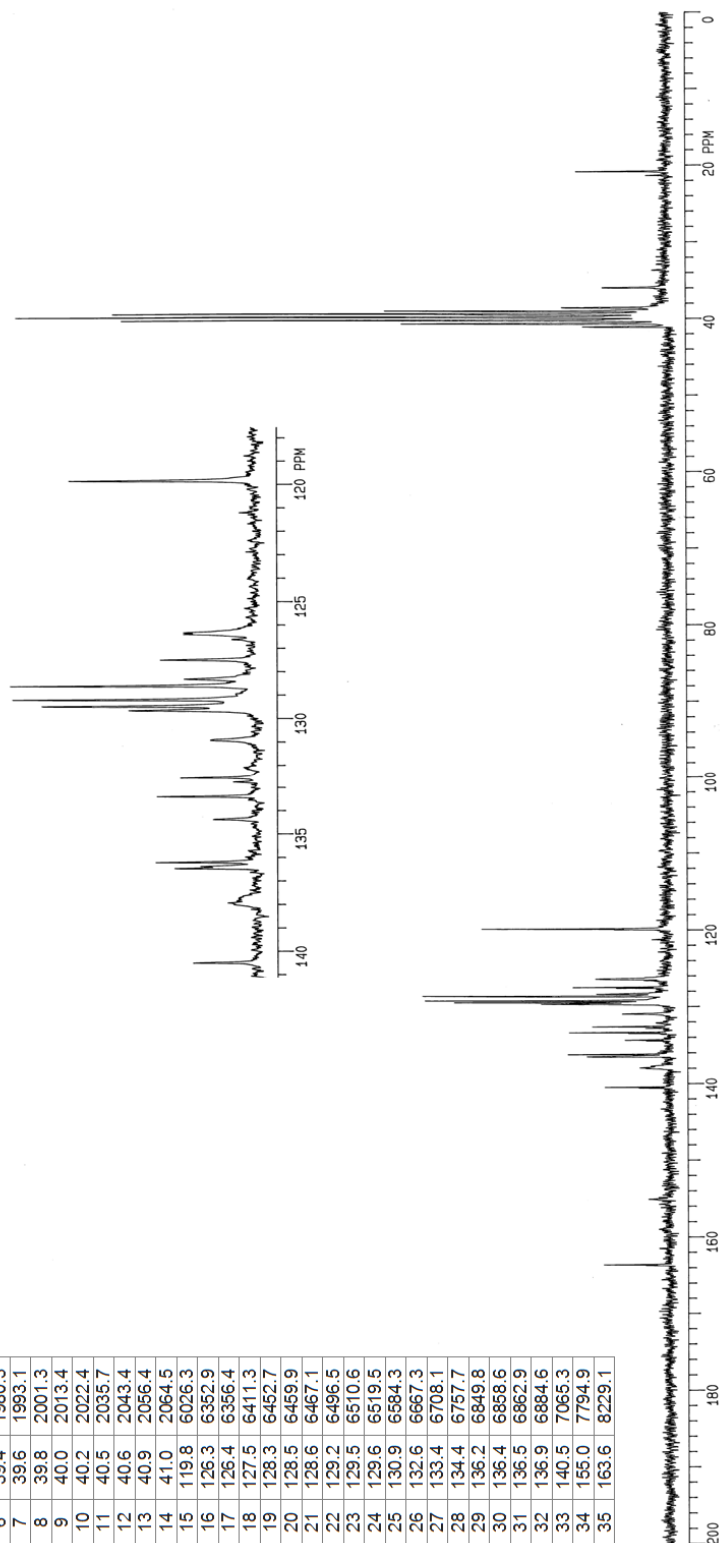

**Spectrum S29.**  $^{13}\text{C}$  NMR of compd **17** (50 MHz.  $\text{DMSO-}d_6$ ).

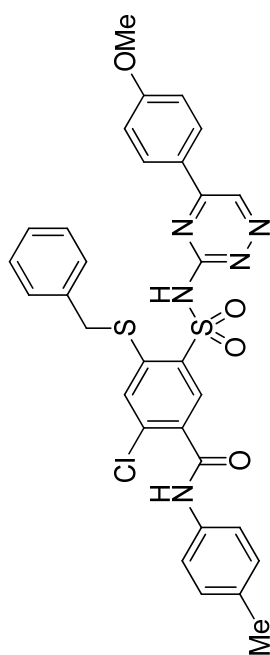

| No. | (ppm) | Hz     |
|-----|-------|--------|
| 1   | 2.31  | 461.6  |
| 2   | 3.78  | 756.1  |
| 3   | 4.40  | 879.9  |
| 4   | 7.03  | 1405.7 |
| 5   | 7.07  | 1414.0 |
| 6   | 7.18  | 1436.6 |
| 7   | 7.21  | 1442.5 |
| 8   | 7.34  | 1467.8 |
| 9   | 7.36  | 1472.0 |
| 10  | 7.62  | 1523.5 |
| 11  | 7.65  | 1529.8 |
| 12  | 7.93  | 1586.3 |
| 13  | 7.97  | 1594.6 |
| 14  | 8.27  | 1654.5 |
| 15  | 9.10  | 1819.9 |
| 16  | 10.57 | 2113.2 |
| 17  | 14.50 | 2899.8 |

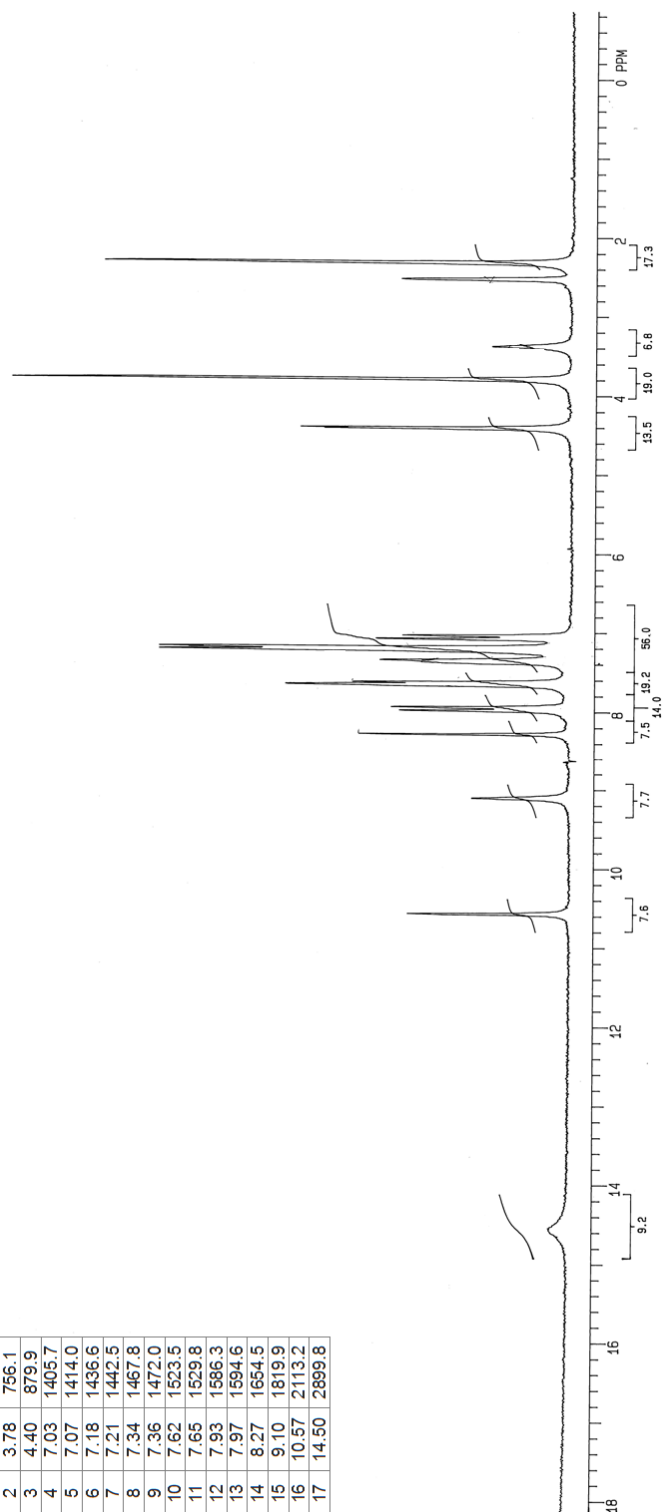

**Spectrum S30.**  $^1\text{H}$  NMR of compd **18** (200 MHz.  $\text{DMSO-}d_6$ ).

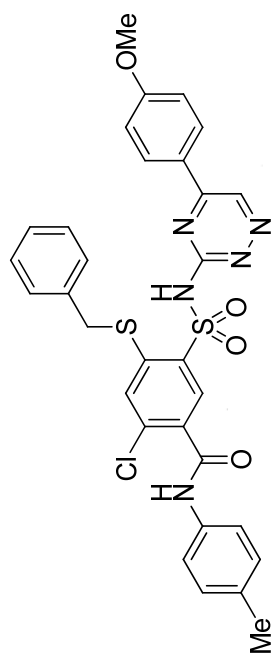

| No. | (ppm) | Hz     |
|-----|-------|--------|
| 1   | 20.8  | 1045.8 |
| 2   | 35.9  | 1801.2 |
| 3   | 38.5  | 1938.4 |
| 4   | 38.9  | 1959.2 |
| 5   | 39.2  | 1972.0 |
| 6   | 39.4  | 1980.3 |
| 7   | 39.6  | 1993.1 |
| 8   | 39.8  | 2001.3 |
| 9   | 40.0  | 2013.4 |
| 10  | 40.2  | 2022.4 |
| 11  | 40.5  | 2035.7 |
| 12  | 40.6  | 2043.4 |
| 13  | 40.9  | 2056.4 |
| 14  | 41.0  | 2064.5 |
| 15  | 55.7  | 2808.2 |
| 16  | 115.2 | 5795.8 |
| 17  | 119.9 | 6029.0 |
| 18  | 124.5 | 6260.2 |
| 19  | 127.5 | 6411.3 |
| 20  | 127.9 | 6430.7 |
| 21  | 128.6 | 6468.6 |
| 22  | 129.1 | 6494.5 |
| 23  | 129.5 | 6512.0 |
| 24  | 130.5 | 6563.4 |
| 25  | 131.7 | 6621.8 |
| 26  | 132.4 | 6659.5 |
| 27  | 133.3 | 6703.0 |
| 28  | 133.7 | 6726.7 |
| 29  | 136.3 | 6854.4 |
| 30  | 136.6 | 6869.3 |
| 31  | 140.2 | 7050.2 |
| 32  | 154.2 | 7754.6 |
| 33  | 163.7 | 8233.5 |
| 34  | 164.6 | 8280.0 |

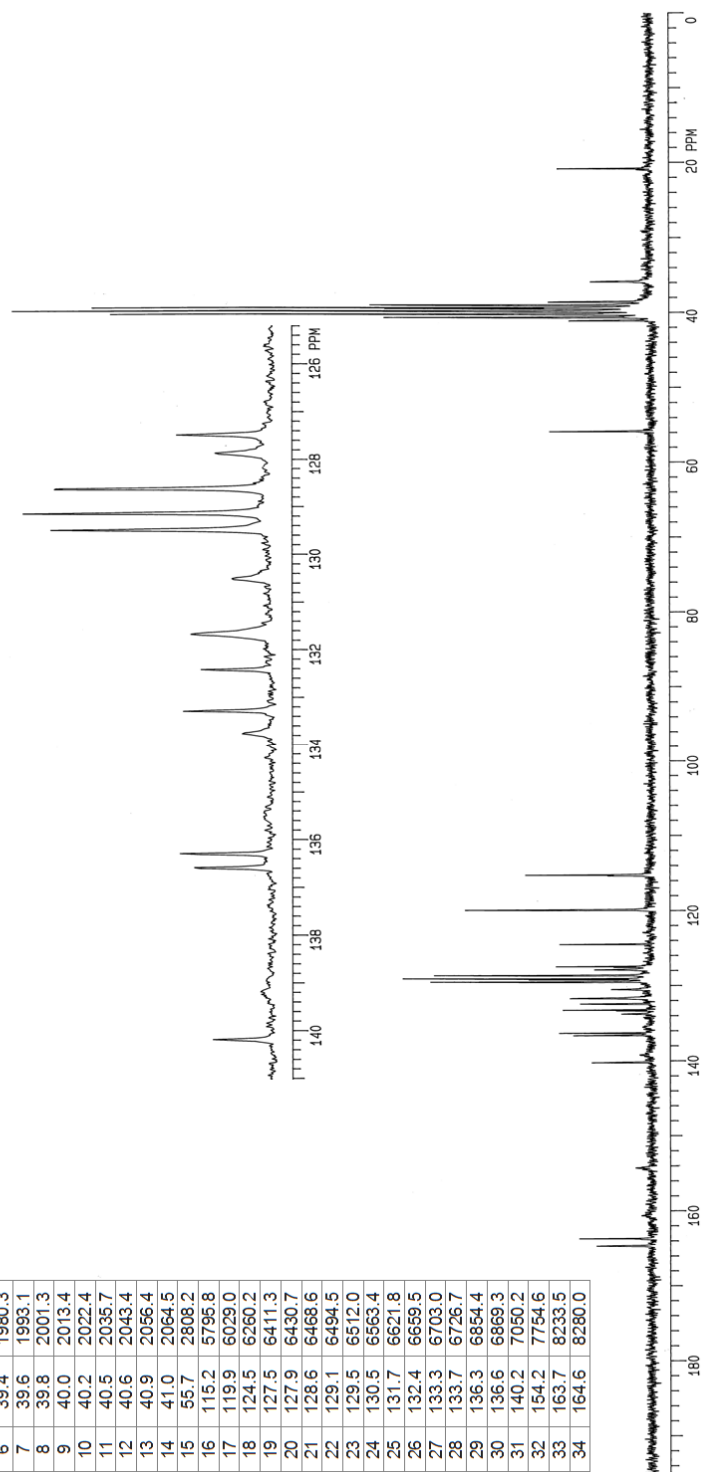

**Spectrum S31.**  $^{13}\text{C}$  NMR of compd **18** (50 MHz.  $\text{DMSO-}d_6$ ).



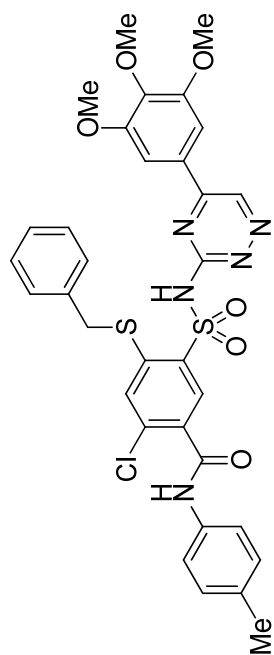

| No. | (ppm) | Hz     |
|-----|-------|--------|
| 1   | 2.29  | 458.8  |
| 2   | 3.71  | 741.0  |
| 3   | 3.80  | 758.9  |
| 4   | 4.43  | 886.1  |
| 5   | 7.14  | 1426.8 |
| 6   | 7.18  | 1434.9 |
| 7   | 7.23  | 1446.7 |
| 8   | 7.26  | 1452.7 |
| 9   | 7.40  | 1480.5 |
| 10  | 7.47  | 1493.3 |
| 11  | 7.52  | 1502.8 |
| 12  | 7.56  | 1510.7 |
| 13  | 7.63  | 1525.3 |
| 14  | 8.20  | 1640.6 |
| 15  | 9.32  | 1864.0 |
| 16  | 10.50 | 2090.0 |
| 17  | 14.20 | 2839.7 |

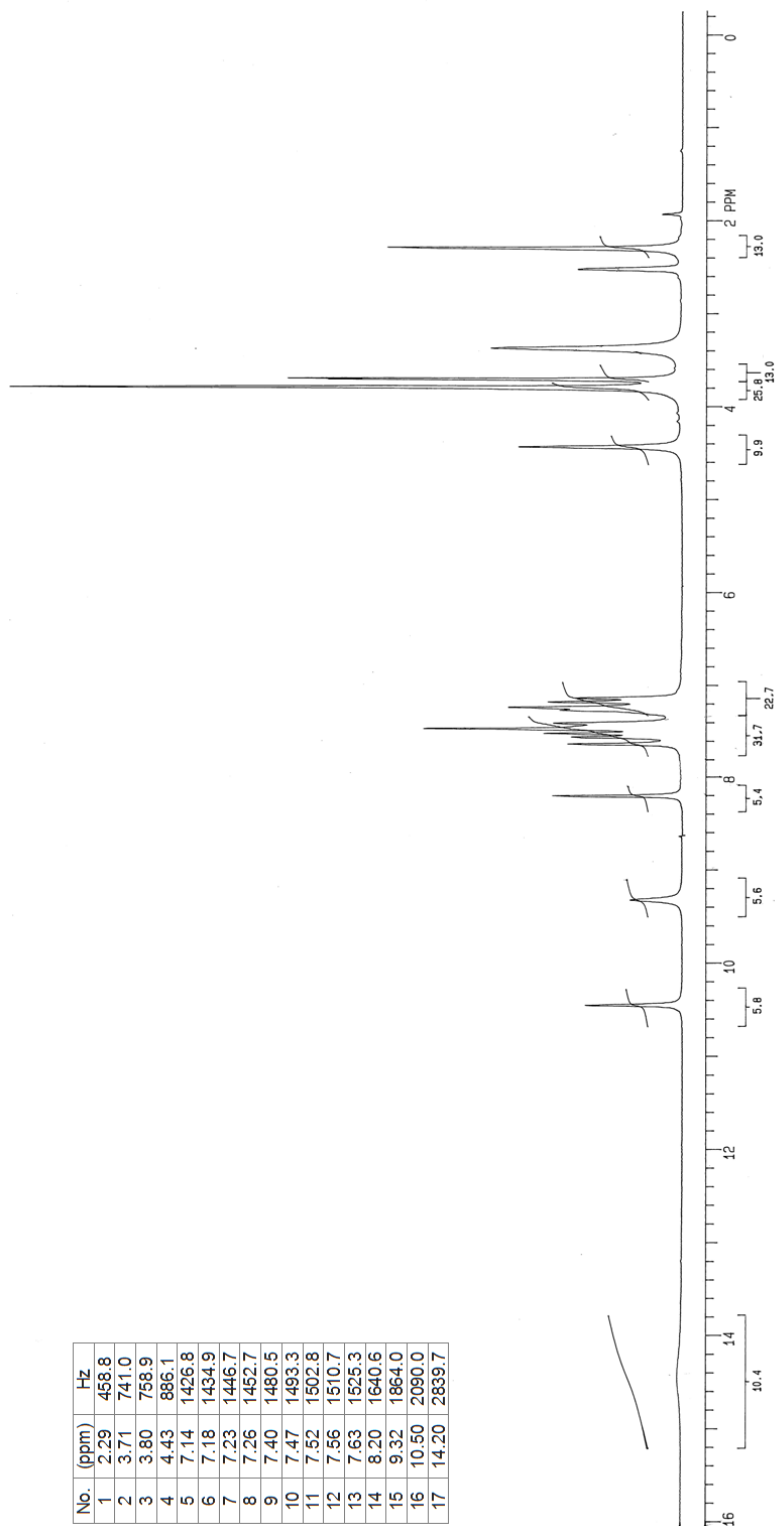

**Spectrum S32.**  $^1\text{H}$  NMR of compd **19** (200 MHz.  $\text{DMSO-}d_6$ ).

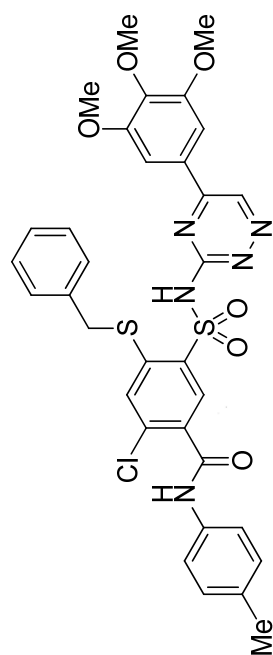

| No. | (ppm) | Hz     |
|-----|-------|--------|
| 1   | 20.8  | 1045.4 |
| 2   | 35.9  | 1802.9 |
| 3   | 38.5  | 1938.4 |
| 4   | 38.9  | 1959.2 |
| 5   | 39.2  | 1972.0 |
| 6   | 39.4  | 1980.3 |
| 7   | 39.6  | 1993.1 |
| 8   | 39.8  | 2001.3 |
| 9   | 40.0  | 2013.4 |
| 10  | 40.2  | 2022.4 |
| 11  | 40.5  | 2035.7 |
| 12  | 40.6  | 2043.4 |
| 13  | 40.9  | 2056.4 |
| 14  | 41.0  | 2064.5 |
| 15  | 56.2  | 2828.2 |
| 16  | 60.5  | 3042.9 |
| 17  | 106.6 | 5353.5 |
| 18  | 119.8 | 6023.6 |
| 19  | 127.4 | 6405.7 |
| 20  | 127.6 | 6416.4 |
| 21  | 127.7 | 6421.0 |
| 22  | 128.7 | 6472.3 |
| 23  | 129.3 | 6500.3 |
| 24  | 129.4 | 6506.2 |
| 25  | 130.0 | 6537.4 |
| 26  | 132.3 | 6653.0 |
| 27  | 133.2 | 6699.6 |
| 28  | 133.9 | 6735.8 |
| 29  | 136.2 | 6848.7 |
| 30  | 136.4 | 6861.0 |
| 31  | 140.4 | 7061.8 |
| 32  | 143.5 | 7216.6 |
| 33  | 153.5 | 7721.2 |
| 34  | 154.5 | 7769.7 |
| 35  | 163.4 | 8217.7 |

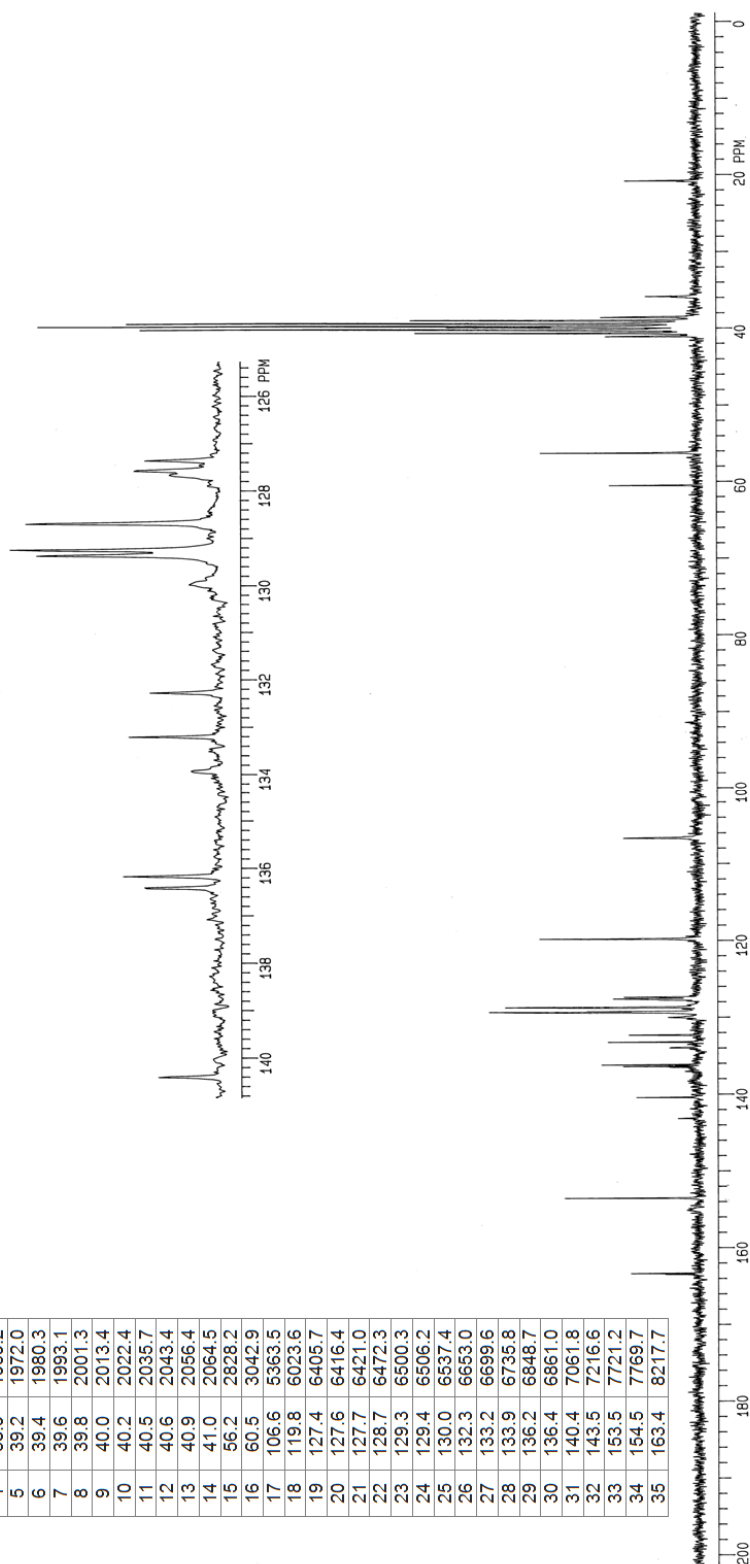

**Spectrum S33.**  $^{13}\text{C}$  NMR of compd **19** (50 MHz.  $\text{DMSO-}d_6$ ).

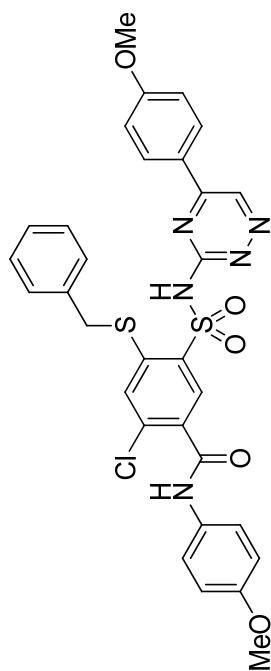

| No. | (ppm) | Hz     |
|-----|-------|--------|
| 1   | 3.77  | 753.2  |
| 2   | 3.79  | 757.9  |
| 3   | 4.39  | 878.1  |
| 4   | 6.94  | 1387.6 |
| 5   | 6.98  | 1396.6 |
| 6   | 7.03  | 1406.2 |
| 7   | 7.08  | 1415.2 |
| 8   | 7.17  | 1434.2 |
| 9   | 7.18  | 1435.9 |
| 10  | 7.19  | 1439.2 |
| 11  | 7.20  | 1440.7 |
| 12  | 7.33  | 1466.2 |
| 13  | 7.35  | 1469.8 |
| 14  | 7.63  | 1526.3 |
| 15  | 7.68  | 1535.4 |
| 16  | 7.93  | 1584.9 |
| 17  | 7.97  | 1593.7 |
| 18  | 8.26  | 1651.1 |
| 19  | 9.10  | 1819.8 |
| 20  | 10.49 | 2098.4 |

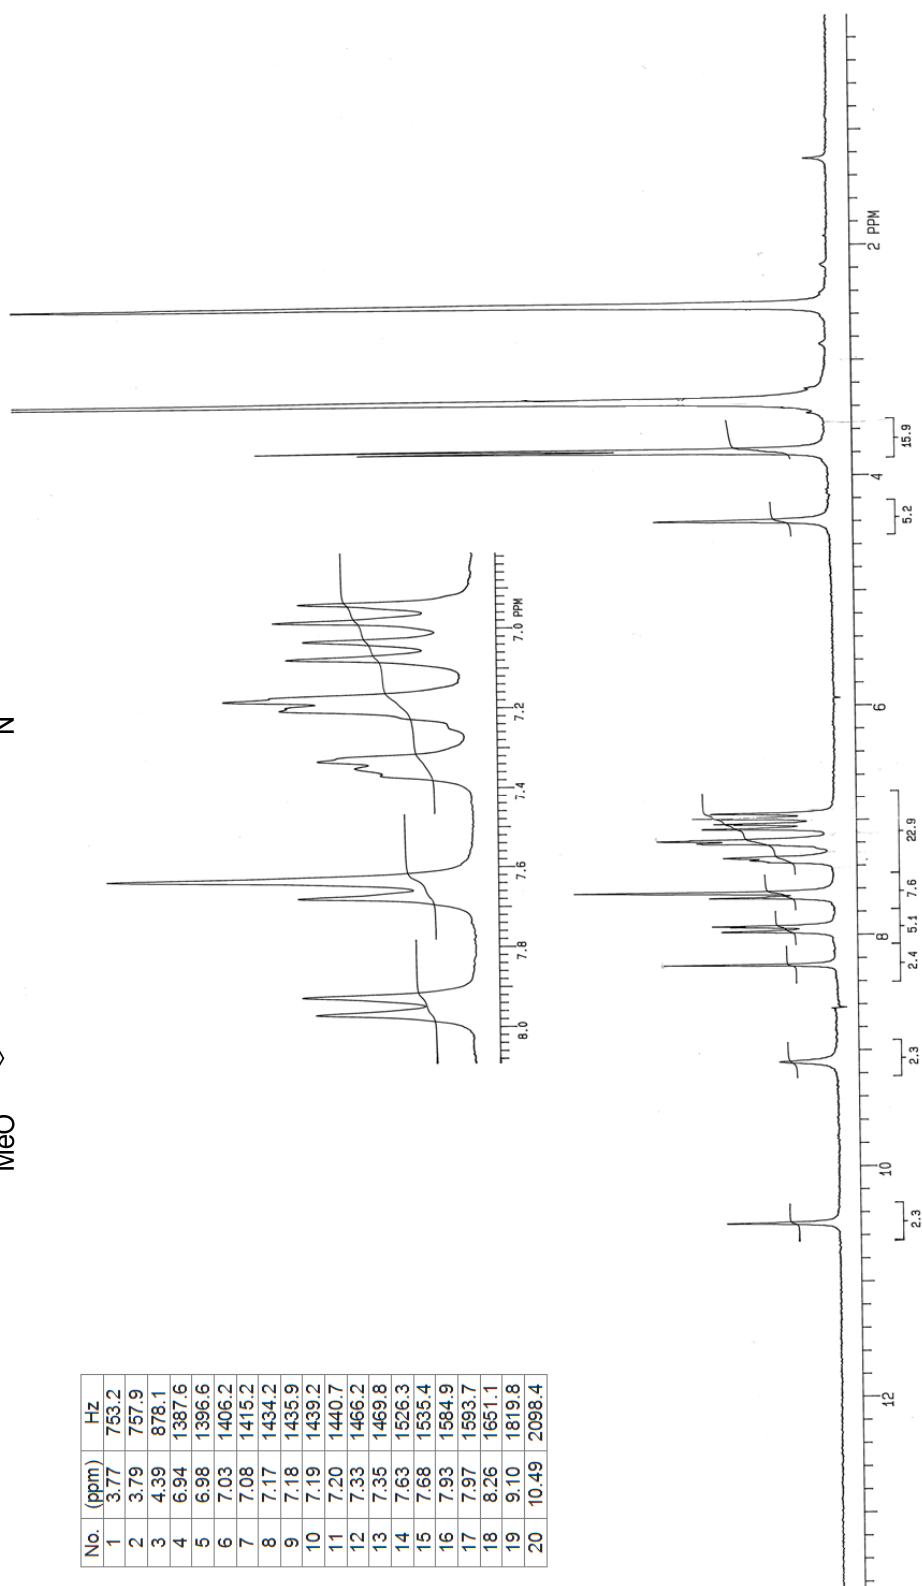

**Spectrum S34.**  $^1\text{H}$  NMR of compd **20** (200 MHz,  $\text{DMSO}-d_6$ ).

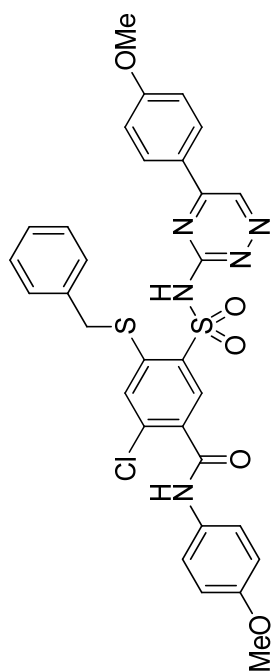

| No. | (ppm) | Hz     |
|-----|-------|--------|
| 1   | 35.8  | 1802.4 |
| 2   | 38.5  | 1938.4 |
| 3   | 38.9  | 1959.2 |
| 4   | 39.2  | 1972.0 |
| 5   | 39.4  | 1980.3 |
| 6   | 39.6  | 1993.1 |
| 7   | 39.8  | 2001.3 |
| 8   | 40.0  | 2013.4 |
| 9   | 40.2  | 2022.4 |
| 10  | 40.5  | 2035.7 |
| 11  | 40.6  | 2043.4 |
| 12  | 40.9  | 2056.4 |
| 13  | 41.0  | 2064.5 |
| 14  | 55.5  | 2791.9 |
| 15  | 55.9  | 2809.5 |
| 16  | 114.3 | 5745.8 |
| 17  | 115.3 | 5796.3 |
| 18  | 121.4 | 6105.9 |
| 19  | 124.5 | 6260.1 |
| 20  | 127.5 | 6411.1 |
| 21  | 127.9 | 6431.3 |
| 22  | 128.6 | 6468.0 |
| 23  | 129.1 | 6493.7 |
| 24  | 130.5 | 6561.4 |
| 25  | 131.7 | 6621.8 |
| 26  | 132.2 | 6649.0 |
| 27  | 132.5 | 6663.0 |
| 28  | 133.8 | 6727.4 |
| 29  | 136.3 | 6854.3 |
| 30  | 140.1 | 7045.3 |
| 31  | 156.0 | 7845.9 |
| 32  | 163.5 | 8221.4 |
| 33  | 164.6 | 8280.0 |

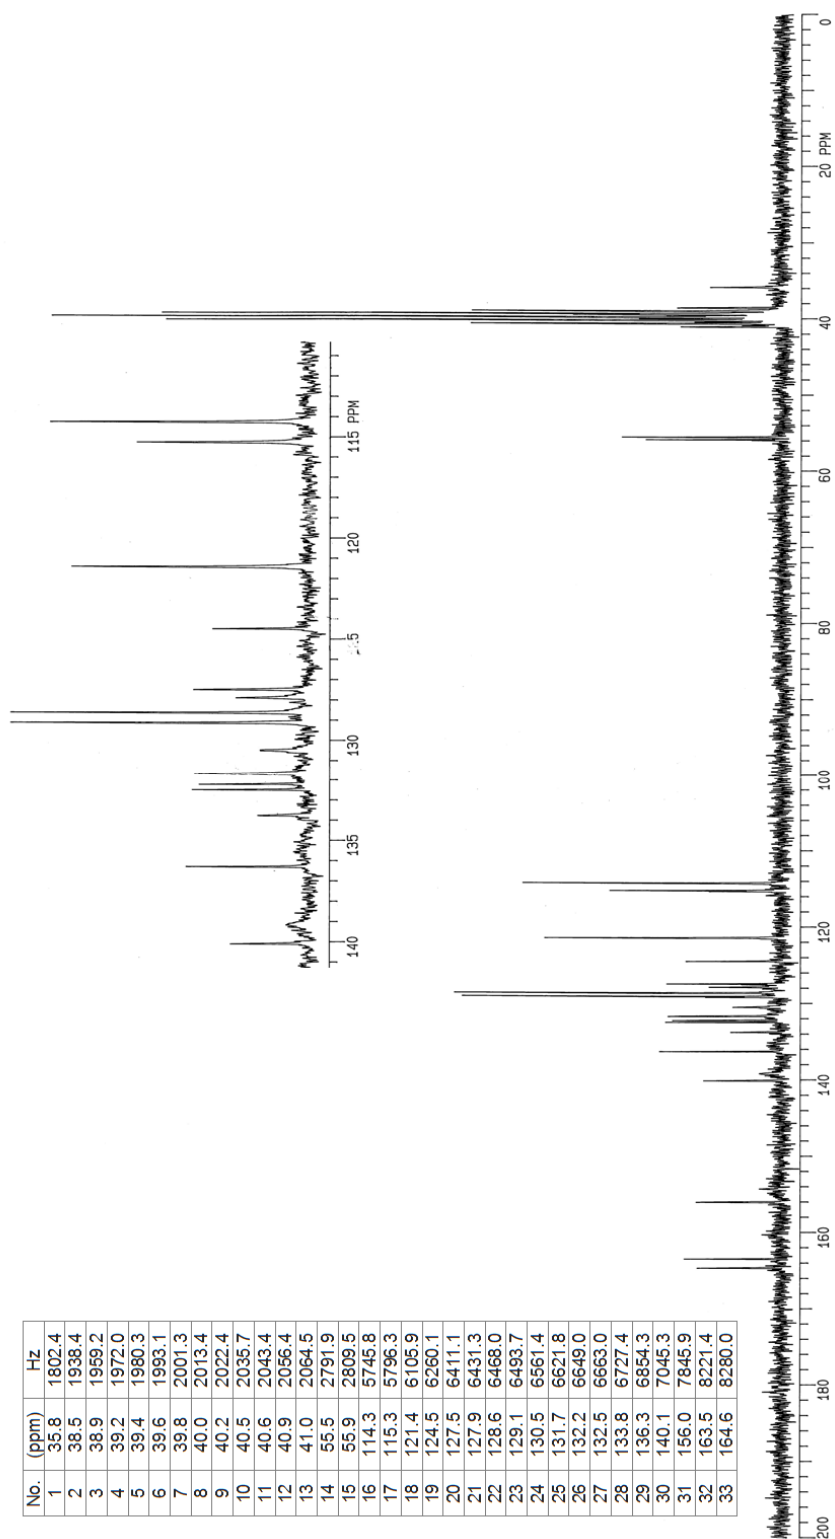

**Spectrum S35.**  $^{13}\text{C}$  NMR of compd **20** (50 MHz.  $\text{DMSO-}d_6$ ).

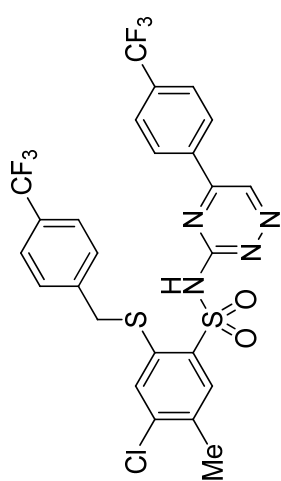

BZS\_248\_2

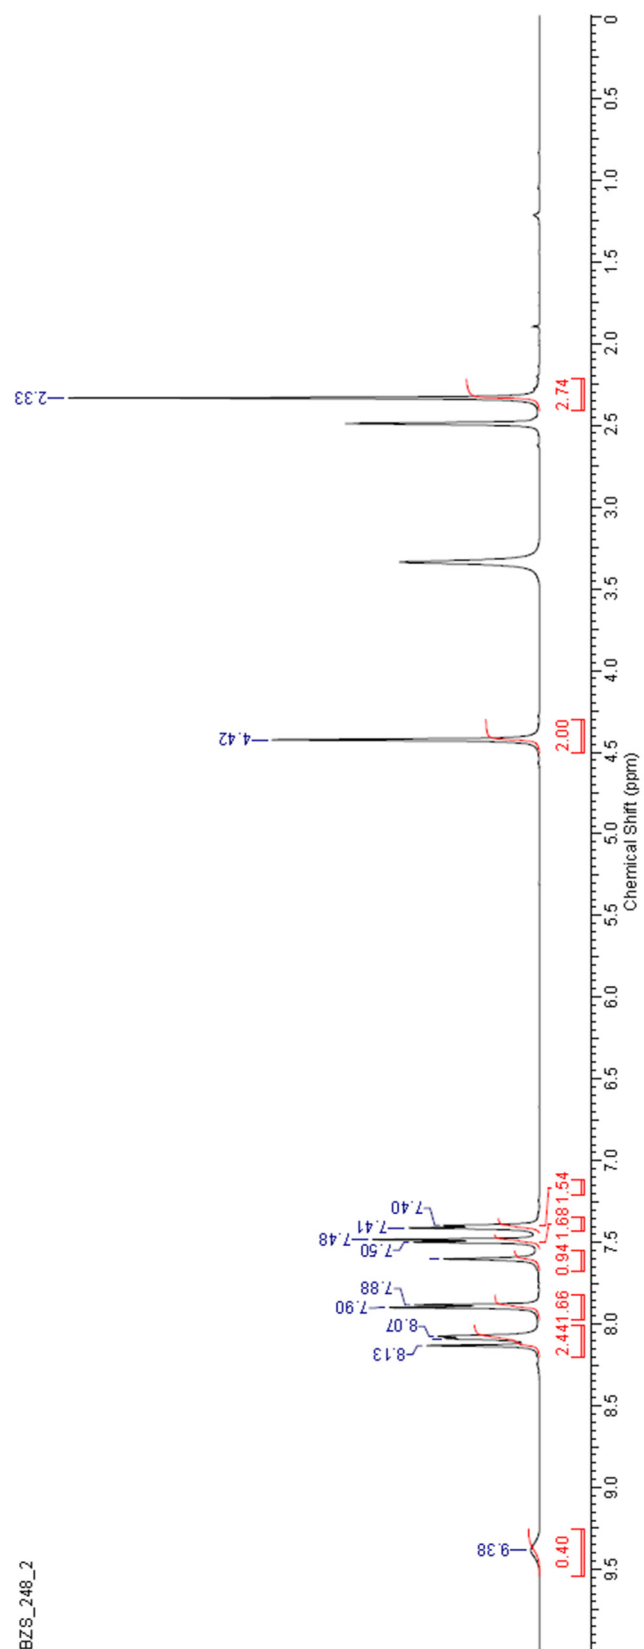

**Spectrum S36.**  $^1\text{H}$  NMR of compd **21** (500 MHz.  $\text{DMSO-}d_6$ ).

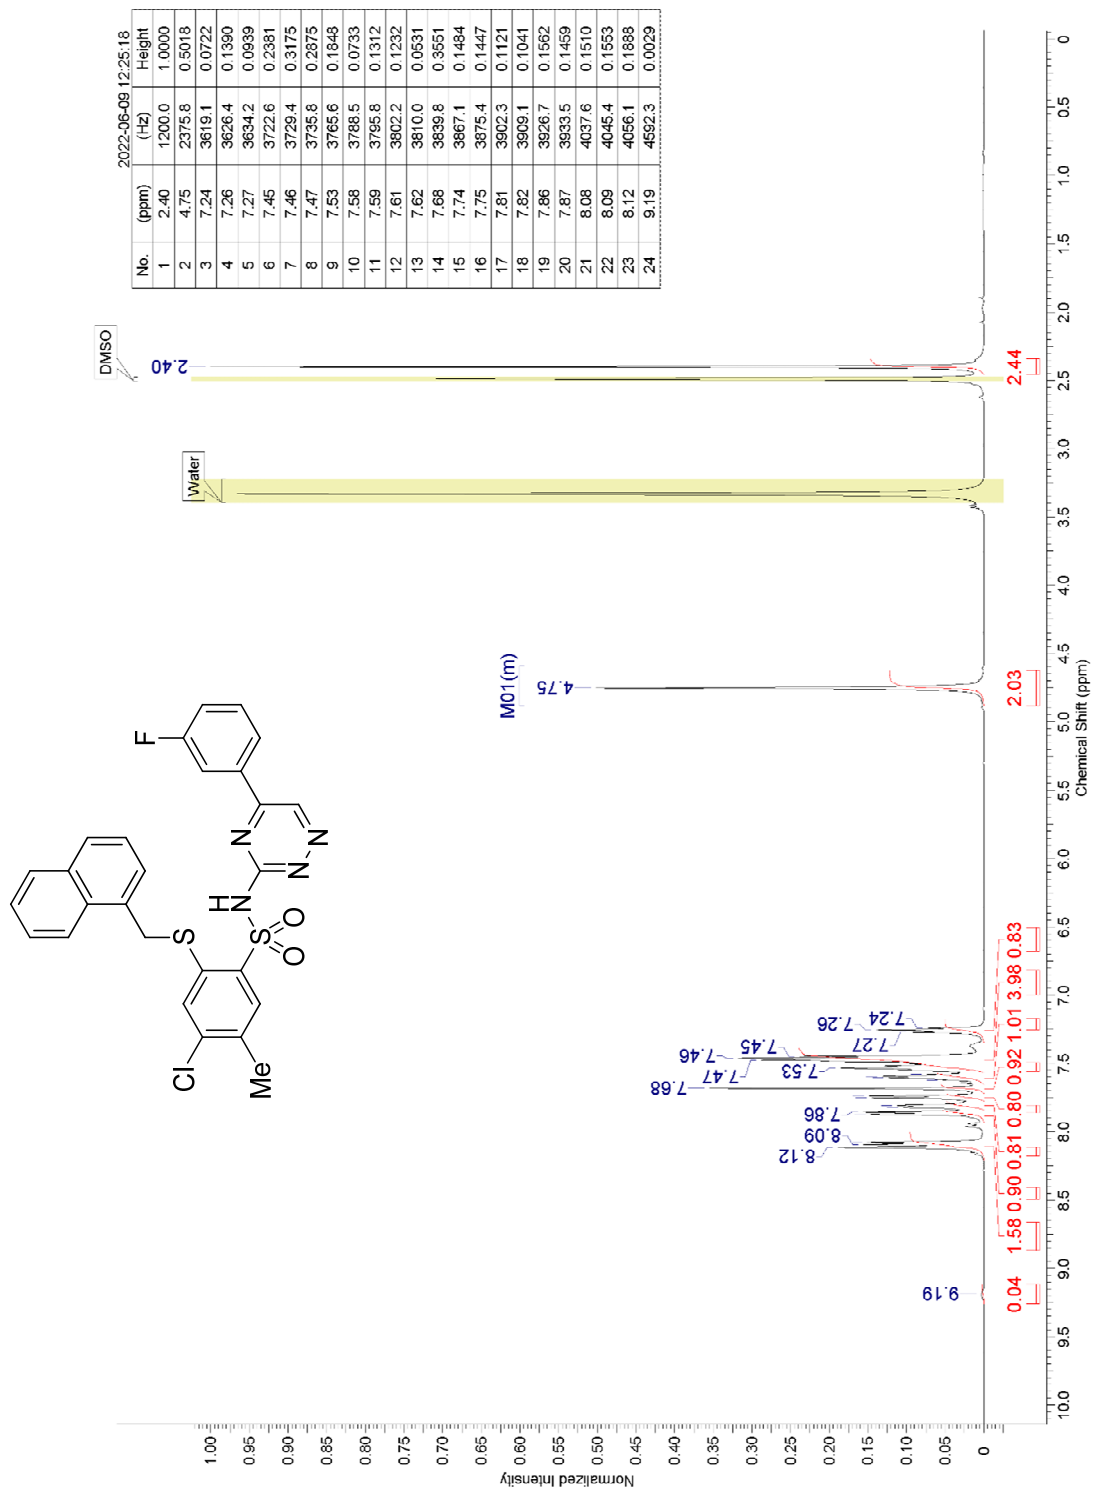

Spectrum S37.  $^1\text{H}$  NMR of compd **22** (500 MHz.  $\text{DMSO-}d_6$ ).

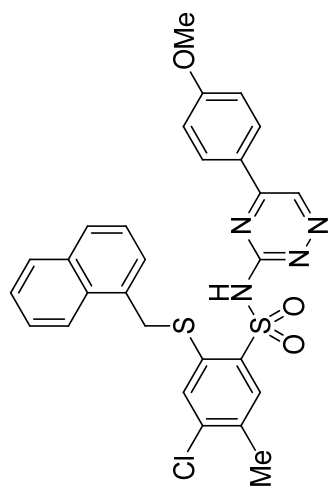

| No. | (ppm) | (Hz)   |
|-----|-------|--------|
| 1   | 2.42  | 1211.2 |
| 2   | 3.88  | 1938.3 |
| 3   | 4.73  | 2361.7 |
| 4   | 7.05  | 3525.8 |
| 5   | 7.07  | 3534.6 |
| 6   | 7.28  | 3637.6 |
| 7   | 7.29  | 3644.5 |
| 8   | 7.31  | 3652.8 |
| 9   | 7.46  | 3729.4 |
| 10  | 7.47  | 3735.3 |
| 11  | 7.49  | 3742.1 |
| 12  | 7.50  | 3748.5 |
| 13  | 7.51  | 3755.3 |
| 14  | 7.60  | 3799.7 |
| 15  | 7.77  | 3884.2 |
| 16  | 7.79  | 3892.5 |
| 17  | 7.88  | 3937.9 |
| 18  | 7.89  | 3945.8 |
| 19  | 7.93  | 3963.3 |
| 20  | 7.94  | 3970.7 |
| 21  | 8.08  | 4040.0 |
| 22  | 8.10  | 4047.8 |
| 23  | 8.13  | 4065.4 |
| 24  | 9.00  | 4498.5 |
| 25  | 14.39 | 7191.6 |

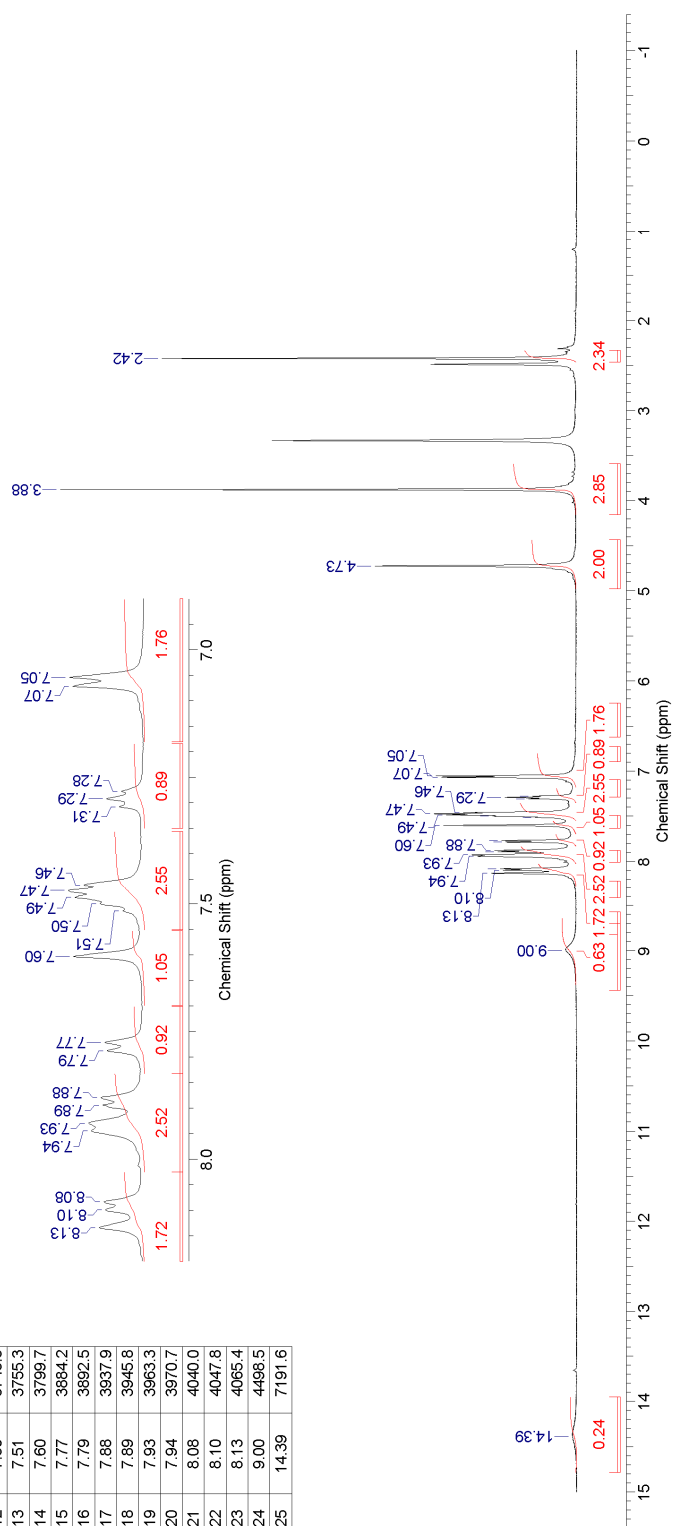

**Spectrum S38.**  $^1\text{H}$  NMR of compd **23** (500 MHz.  $\text{DMSO}-d_6$ ).

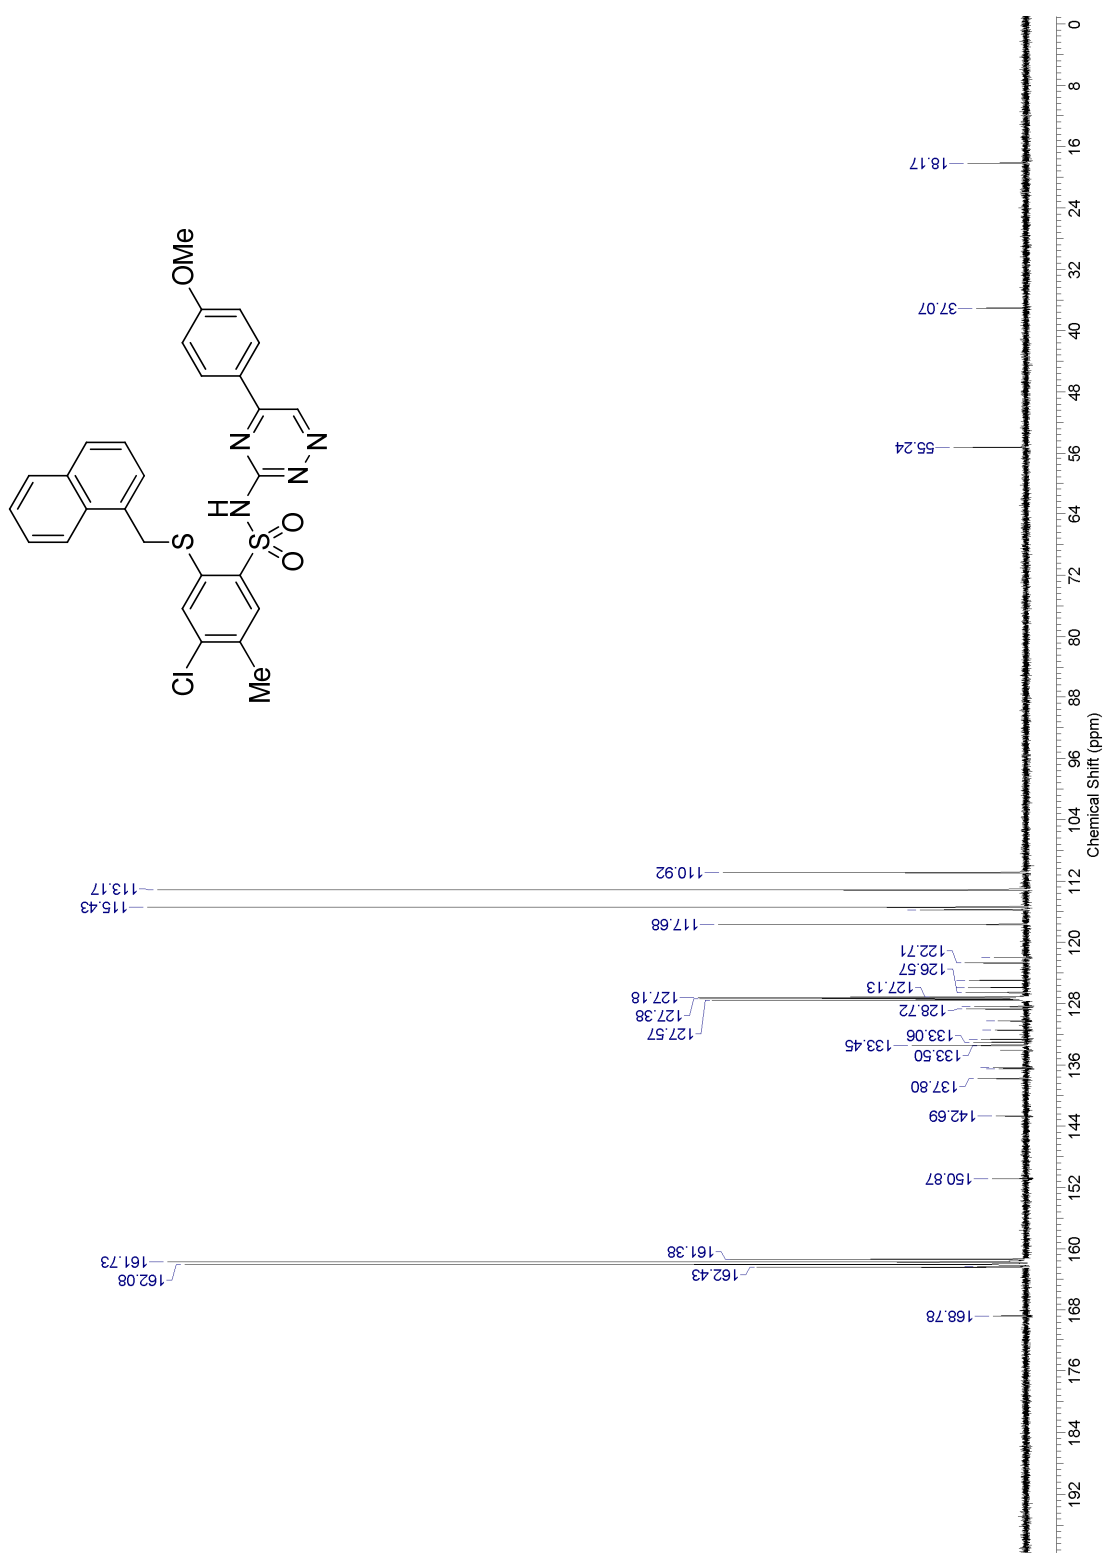

**Spectrum S39.**  $^{13}\text{C}$  NMR of compd **23** (125 MHz. TFA).



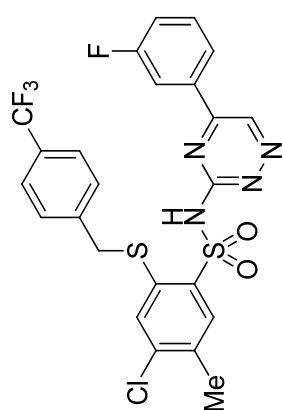

BZS\_243\_2

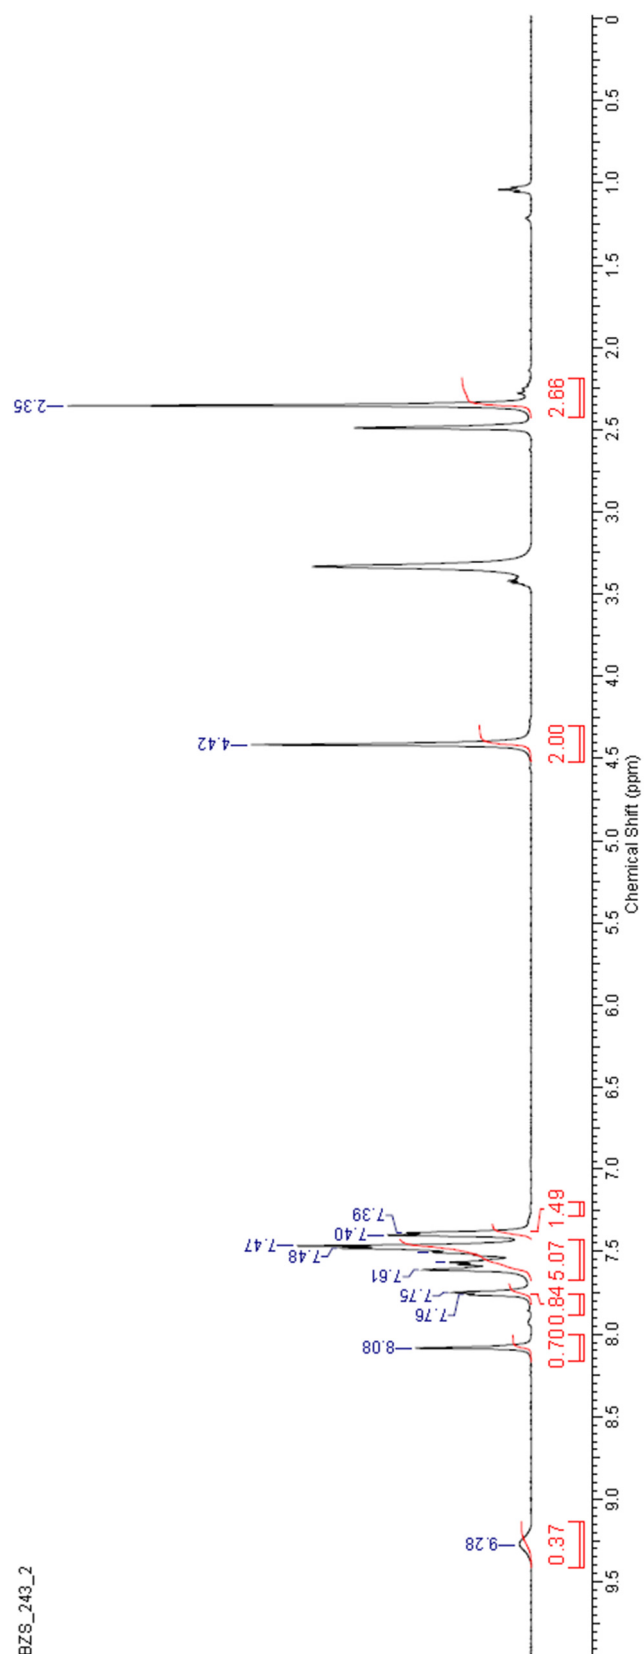

**Spectrum S40.**  $^1\text{H}$  NMR of compd **24** (500 MHz.  $\text{DMSO}-d_6$ ).

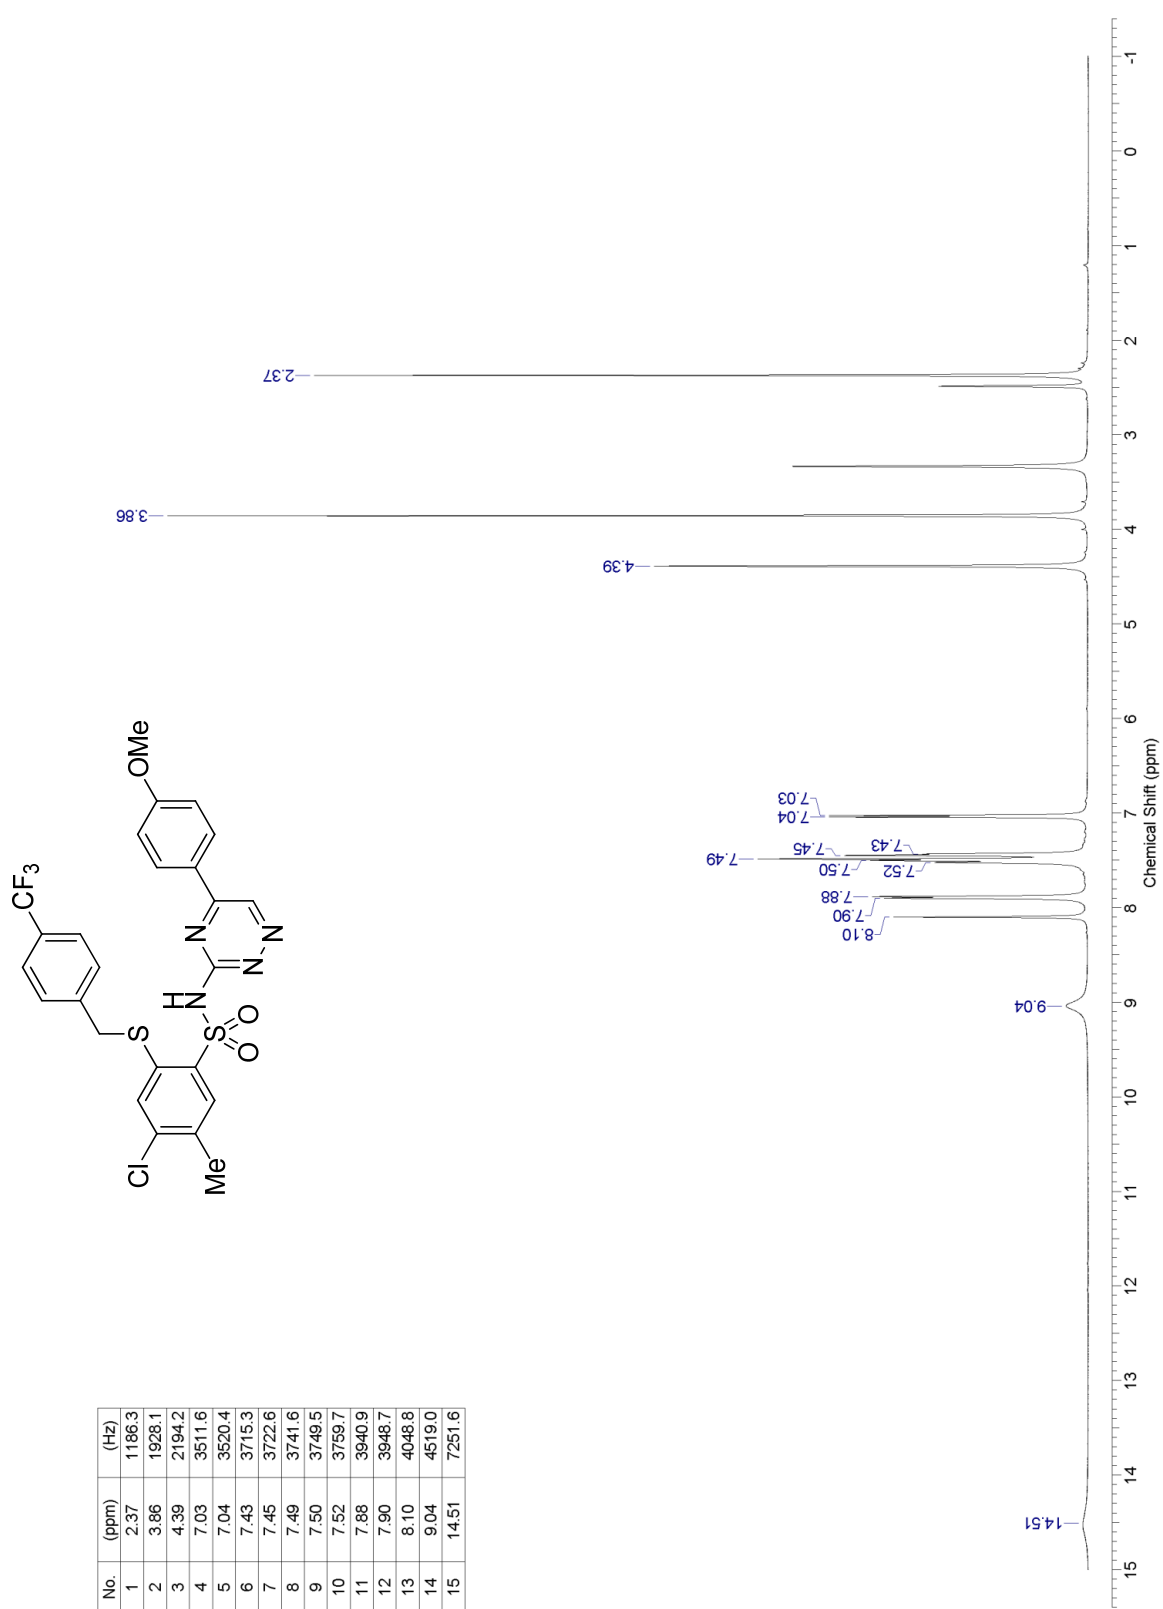

**Spectrum S41.**  $^1\text{H}$  NMR of compd **25** (500 MHz,  $\text{DMSO}-d_6$ ).

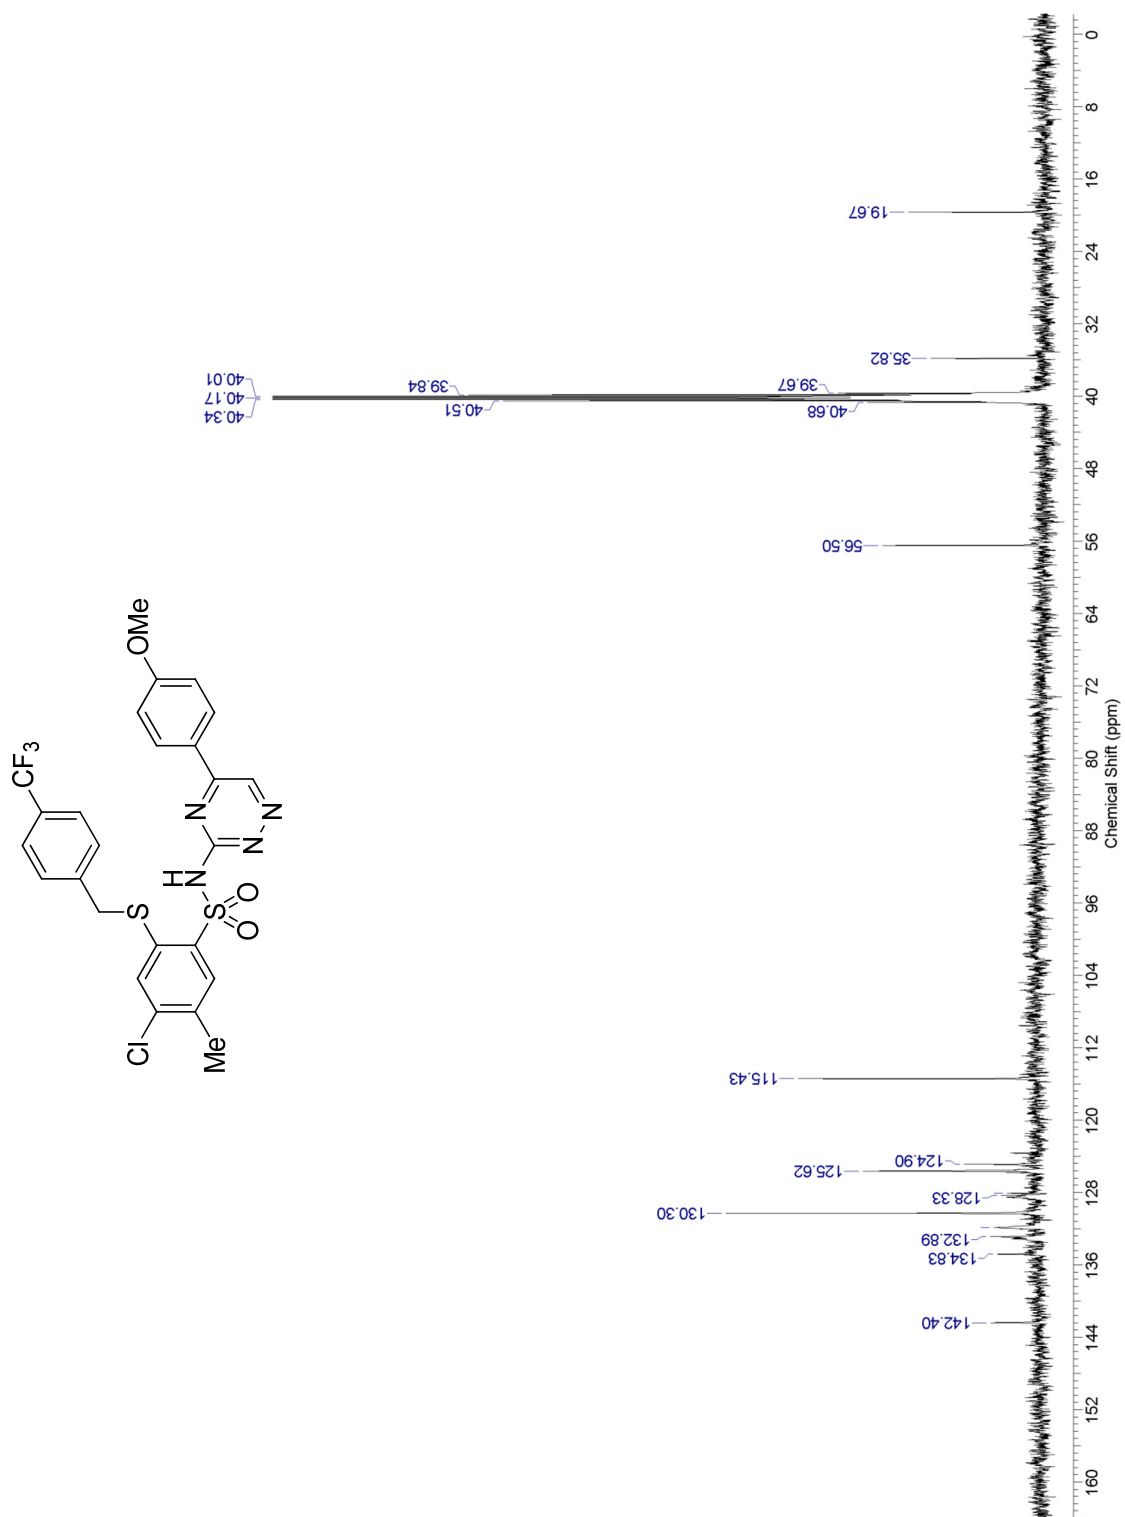

**Spectrum S42.**  $^{13}\text{C}$  NMR of compd **25** (125 MHz,  $\text{DMSO}-d_6$ ).

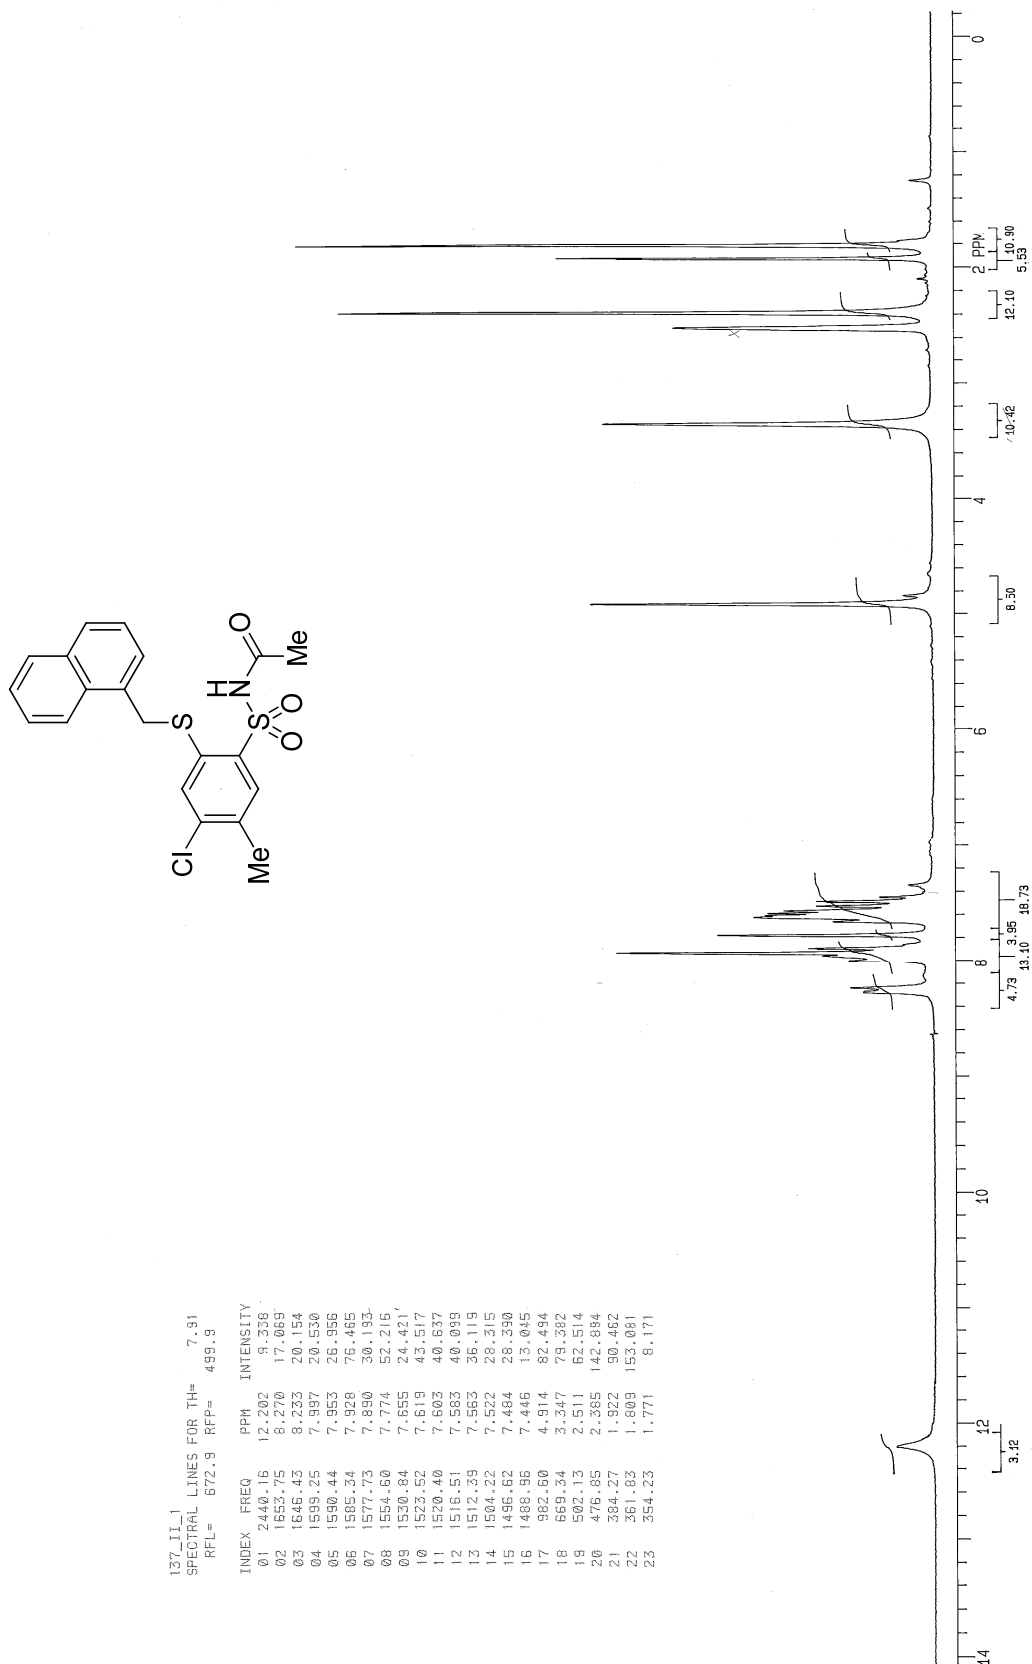

Spectrum S43.  $^1\text{H}$  NMR of compd **26** (200 MHz.  $\text{DMSO-d}_6$ ).

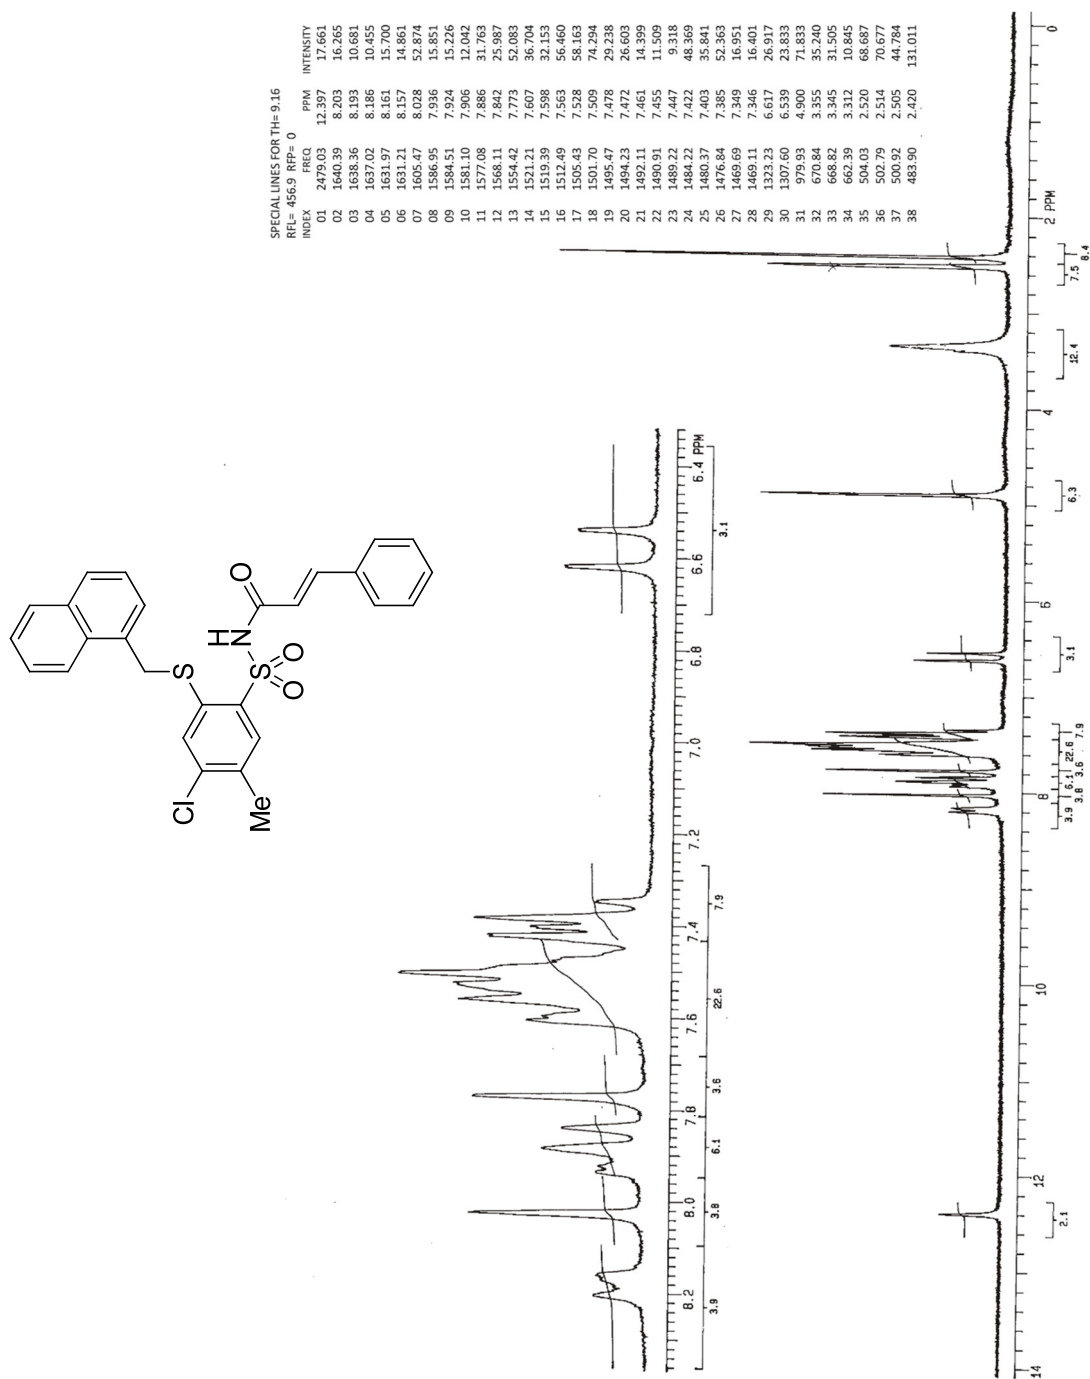

**Spectrum S44.** <sup>1</sup>H NMR of compd **27** (200 MHz, DMSO-d<sub>6</sub>).

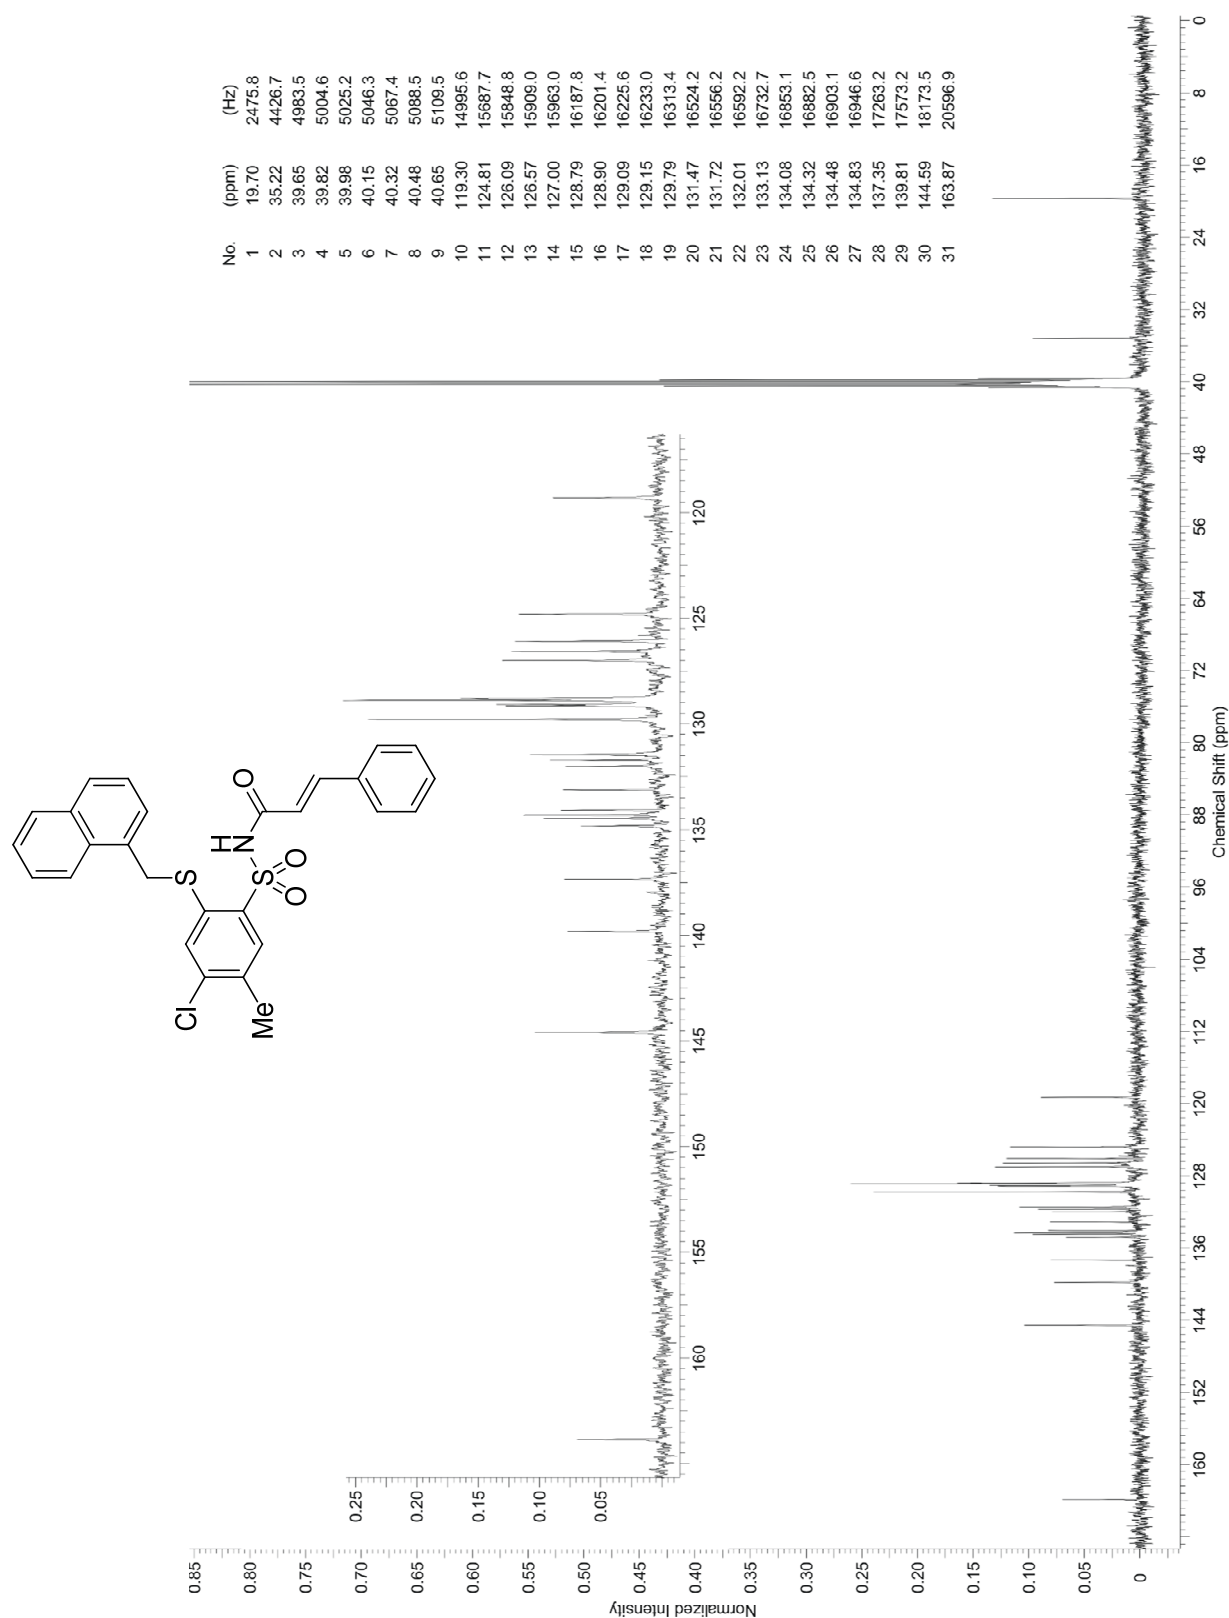

**Spectrum S45.**  $^{13}\text{C}$  NMR of compd **27** (125 MHz. DMSO- $d_6$ )

Method of synthesis and full structure analysis of compounds **1-27** have been published in:

*Compounds 1-7*; B. Żołnowska. J. Sławiński. Z. Brzozowski. A. Kawiak. M. Belka. J. Zielińska. T. Bączek. J. Chojnacki. Synthesis. Molecular Structure. Anticancer Activity. and QSAR Study of N-(aryl/heteroaryl)-4-(1H-pyrrol-1-yl)Benzenesulfonamide Derivatives. Int. J. Mol. Sci. 19 (2018).  
<https://doi.org/10.3390/ijms19051482>.

*Compounds 8-12*; B. Żołnowska, J. Sławiński, A. Pogorzelska, K. Szafrąński, A. Kawiak, G. Stasiłojć, M. Belka, J. Zielińska, T. Bączek. Synthesis, QSAR studies, and metabolic stability of novel 2-alkylthio-4-chloro-N-(5-oxo-4,5-dihydro-1,2,4-triazin-3-yl)benzenesulfonamide derivatives as potential anticancer and apoptosis-inducing agents.. Chem. Biol. Drug Des. 90 (2017) 380–396. <https://doi.org/10.1111/cbdd.12955>.

*Compounds 13-25*; B. Żołnowska, J. Sławiński, A. Pogorzelska, K. Szafrąński, A. Kawiak, G. Stasiłojć, M. Belka, S. Ulenberg, T. Bączek, J. Chojnacki. Novel 5-substituted 2-(arylmethylthio)-4-chloro-N-(5-aryl-1,2,4-triazin-3-yl)benzenesulfonamides: Synthesis, molecular structure, anticancer activity, apoptosis-inducing activity and metabolic stability. Molecules. 21 (2016). <https://doi.org/10.3390/molecules21060808>.

*Compounds 26-27*; B. Żołnowska, J. Sławiński, M. Belka, T. Bączek, A. Kawiak, J. Chojnacki, A. Pogorzelska, K. Szafrąński. Synthesis, Molecular Structure, Metabolic Stability and QSAR Studies of a Novel Series of Anticancer N-Acylbenzenesulfonamides. Molecules. 20 (2015) 19101–19129. <https://doi.org/10.3390/molecules201019101>.
